# Supplementary material for: Authentic Research Experience and “Big Data” Analysis in the Classroom: Maize Response to Abiotic Stress
Source: Atypon-hosted journal article supplement (doi:10.1187/cbe.15-04-0081), 2015-07-03
Supplement: cbe-cbe-15-04-0081-s01.csv [file cbe-cbe-15-04-0081-s01.csv]

Gene_ID	Mo17_control_rep1	Mo17_control_rep2	Mo17_control_rep3	Mo17_cold_rep1	Mo17_cold_rep2	Mo17_cold_rep3	Mo17_heat_rep1	Mo17_heat_rep2	Mo17_heat_rep3	B73_control_rep1	B73_control_rep2	B73_control_rep3	B73_cold_rep1	B73_cold_rep2	B73_Cold_rep3	B73_heat_rep1	B73_heat_rep2	B73_heat_rep3
AC147602.5_FG004	7267	24683	30225	10691	22929	26958	4732	15686	19840	5217	12213	15525	5092	14183	19992	2398	18924	15834
AC148152.3_FG001	17	18	53	22	32	51	3	14	18	0	0	0	0	0	0	0	0	0
AC148152.3_FG005	42	105	159	47	70	112	83	92	145	206	559	645	188	669	838	71	327	319
AC148152.3_FG006	0	0	0	1	0	0	0	0	1	16	17	26	11	18	18	3	12	8
AC148152.3_FG008	1460	4560	5840	772	1427	2019	656	1804	2675	2314	6036	6831	1139	3137	4914	1334	4917	4799
AC148167.6_FG001	2627	7776	10348	3097	5892	7633	1256	4453	5796	2267	5895	7182	1779	4542	7130	1017	4578	4138
AC149475.2_FG002	33	217	251	177	292	343	167	353	661	468	1362	1705	220	660	1168	43	488	335
AC149475.2_FG003	565	1959	2442	1019	2016	2151	537	1499	2026	1182	2871	3419	774	1748	3474	168	1356	1098
AC149475.2_FG005	700	2366	3190	1281	2591	3184	431	1390	1800	782	2310	2521	698	2645	3186	359	867	827
AC149475.2_FG007	14	55	97	28	68	82	29	126	121	42	93	118	31	84	100	22	85	88
AC149810.2_FG003	1039	3363	4135	2049	4681	5093	424	1532	1724	1264	3949	4444	965	4526	4858	482	1039	1132
AC149810.2_FG004	286	908	1163	392	941	968	85	343	466	391	896	1099	219	742	1019	24	439	411
AC149810.2_FG008	44	282	296	1513	3050	3879	7	33	44	106	194	304	971	2970	3588	6	63	55
AC149818.2_FG001	132	475	602	322	634	727	76	289	353	200	447	518	215	600	1026	50	198	176
AC149818.2_FG004	23	55	71	38	84	91	67	94	243	161	583	475	54	144	281	6	37	37
AC149818.2_FG005	9	6	11	14	15	35	0	3	14	6	49	45	11	24	27	3	16	11
AC149818.2_FG006	388	1237	1418	480	625	967	289	778	1176	685	1586	1771	341	674	1285	173	1070	938
AC149818.2_FG007	38	72	109	94	173	225	22	83	83	26	77	103	55	163	238	12	44	27
AC149818.2_FG008	111	350	446	182	336	447	174	430	662	104	360	378	64	254	445	83	413	422
AC149818.2_FG009	0	2	5	0	0	2	0	1	0	0	0	0	0	2	0	1	0	3
AC149828.2_FG002	188	596	766	408	862	923	151	512	591	518	1383	1353	340	602	1277	57	507	481
AC149828.2_FG004	2	6	9	1	0	5	3	5	17	10	17	28	4	6	10	0	42	44
AC149828.2_FG005	15	33	26	34	56	47	5	8	27	0	2	5	2	4	4	0	12	0
AC149829.2_FG002	5	20	30	3	2	1	6	22	25	16	44	35	7	20	24	10	29	32
AC149829.2_FG003	130	447	517	353	670	894	86	307	470	451	1296	1418	254	796	1104	75	205	224
AC149829.2_FG004	12	30	50	12	10	14	5	14	19	24	50	78	3	17	21	0	22	11
AC149829.2_FG006	786	2992	3378	3094	5917	7108	501	1557	1969	1419	3575	4379	2261	5648	8515	265	1529	1335
AC150739.3_FG001	73	287	362	69	107	121	54	185	219	99	356	372	32	134	196	33	133	120
AC152495.1_FG002	686	3195	3439	1847	4442	4473	285	1185	1391	1204	4472	4315	832	3717	4112	1012	2175	2161
AC152495.1_FG003	2409	9670	10986	7079	15499	16008	2433	8302	10013	4459	15501	15930	4240	19393	21799	4839	12220	12255
AC152495.1_FG010	683	3672	3812	1684	3954	4187	325	1125	1306	1071	4458	4494	895	3394	4147	1102	2391	2399
AC152495.1_FG011	1	8	19	3	6	11	2	16	15	11	7	23	5	12	18	18	87	73
AC152495.1_FG012	148	636	838	162	404	478	90	259	346	65	142	158	45	119	126	38	77	47
AC152495.1_FG013	3	96	168	0	177	174	0	0	0	0	0	0	0	0	0	0	0	0
AC152495.1_FG015	104	422	416	228	879	657	53	158	181	45	324	286	50	358	367	45	157	167
AC152495.1_FG017	22	157	192	53	353	242	30	115	109	106	269	326	508	1590	1854	96	213	231
AC155352.2_FG001	52	132	192	103	161	297	14	73	46	11	19	22	8	12	53	9	16	13
AC155352.2_FG010	0	2	6	2	1	5	10	10	34	9	11	4	4	6	14	8	85	96
AC155376.2_FG002	0	0	0	0	0	0	0	0	0	0	0	0	2	0	0	4	1	6
AC155376.2_FG004	165	623	652	341	699	887	783	2116	3109	406	988	1123	207	977	993	210	810	679
AC155376.2_FG005	110	297	341	169	296	518	32	214	286	303	709	823	203	632	766	78	480	400
AC155377.1_FG001	3933	14358	18181	6303	11747	15754	1985	6361	8398	5187	12833	16115	3894	13682	17270	2218	6008	5954
AC155377.1_FG002	332	1253	1479	620	1189	1560	381	1236	1487	514	1387	1720	449	1280	1941	235	1059	986
AC155390.2_FG002	9	106	122	45	118	117	15	18	46	37	95	125	23	86	118	17	36	25
AC155434.2_FG001	235	675	876	144	264	395	141	483	593	212	551	674	82	208	305	80	626	499
AC155434.2_FG003	148	489	671	138	136	362	104	211	385	280	435	641	144	246	549	107	463	456
AC155434.2_FG004	428	1427	1852	1238	2548	2958	356	1095	1404	1017	3001	3090	647	2635	3067	596	950	886
AC155434.2_FG005	158	629	720	263	430	691	99	394	511	201	572	660	76	253	340	51	341	215
AC155434.2_FG006	1782	5762	7235	1160	2375	2682	940	2795	3599	1961	4834	5441	842	2312	3016	743	3176	2774
AC155496.2_FG009	986	3433	4159	2524	5007	7112	631	2118	2916	1410	4065	4458	1581	5137	6724	446	1555	1337
AC155610.2_FG007	1280	4376	4855	1980	4271	4878	97	462	486	1160	2317	3956	800	4324	4476	39	240	257
AC155610.2_FG009	45	108	157	77	157	155	9	72	90	106	291	324	89	143	274	20	95	103
AC155622.2_FG001	481	1611	1977	1131	2106	2772	304	1082	1271	1147	2612	3178	763	2793	3475	370	1031	918
AC155622.2_FG004	149	535	659	404	880	1049	123	378	529	320	833	944	327	1113	1277	224	512	443
AC155624.2_FG006	408	1680	1894	491	1153	1281	170	605	684	752	2306	2345	546	1506	2149	141	534	463
AC155624.2_FG011	1552	5146	5886	2127	3746	4284	971	2813	3538	1198	2926	3502	1136	2320	4605	388	3482	2931
AC159612.1_FG007	42	187	240	268	518	591	58	177	213	96	269	340	260	866	1101	4	40	38
AC165171.2_FG002	0	5	3	3	6	17	12	29	49	35	105	92	12	45	35	0	21	19
AC165178.2_FG004	124	375	410	270	501	597	224	667	878	110	253	276	67	174	282	51	408	351
AC166636.1_FG007	167	539	641	216	393	528	35	88	129	179	472	527	121	357	477	17	51	69
AC166636.1_FG008	6	30	51	7	7	21	1	16	21	99	196	245	11	98	114	42	180	152
AC166636.1_FG009	12	21	14	25	23	45	5	22	19	9	24	35	9	32	70	5	36	28
AC177831.3_FG004	68	203	289	33	108	114	35	80	92	26	56	83	11	23	44	10	59	66
AC177833.2_FG001	0	0	0	0	0	0	0	0	0	0	0	0	0	2	0	0	0	0
AC177837.3_FG002	0	0	2	0	5	3	0	0	0	0	0	0	2	3	3	0	0	0
AC177838.2_FG015	112	285	404	105	167	228	117	273	313	135	372	379	34	247	219	64	196	176
AC177844.2_FG003	0	0	0	0	0	0	0	0	0	0	0	0	0	0	0	0	0	0
AC177850.2_FG003	0	0	3	3	4	9	0	2	3	1	4	0	0	0	2	2	1	0
AC177850.2_FG005	15	70	63	92	149	172	6	15	26	59	153	137	40	131	185	12	45	26
AC177860.4_FG002	15	40	44	41	43	62	36	80	136	0	0	0	0	0	1	0	0	0
AC177890.3_FG005	0	2	0	0	0	0	0	0	0	2	4	11	1	22	30	0	6	2
AC177893.3_FG003	0	3	1	0	2	6	3	2	0	0	4	8	1	0	2	2	0	0
AC177893.3_FG006	0	0	0	0	0	0	0	0	0	0	0	0	0	0	0	0	0	0
AC177897.2_FG002	17	77	86	202	342	431	61	119	230	31	69	67	79	269	388	12	68	59
AC177897.2_FG022	28	136	138	127	182	250	89	215	282	180	344	480	76	304	386	17	136	107
AC177897.2_FG029	0	0	0	0	0	0	0	0	0	0	0	0	0	2	0	0	0	0
AC177899.2_FG009	22	62	53	49	66	107	9	35	26	16	45	38	16	43	58	6	23	22
AC177899.2_FG012	2	3	1	2	1	0	0	1	1	1	0	0	0	0	0	0	2	0
AC177900.4_FG001	0	0	0	0	0	0	0	0	0	0	0	0	0	0	0	0	0	0
AC177905.2_FG001	1	0	0	0	0	0	0	0	0	0	0	0	0	1	0	0	0	0
AC177905.2_FG003	0	0	0	0	0	0	0	0	0	6	11	16	6	6	14	5	12	12
AC177908.3_FG002	441	1553	1997	490	890	1123	147	547	718	680	1576	1944	289	1001	1354	65	316	395
AC177908.3_FG003	0	0	0	0	0	0	0	0	0	0	0	0	0	0	0	0	0	0
AC177908.3_FG006	0	1	0	0	1	0	0	0	0	0	0	0	0	0	2	0	2	0
AC177911.4_FG005	2	3	8	4	1	13	1	7	4	1	2	5	0	7	11	3	3	5
AC177920.3_FG008	0	0	0	0	0	0	0	1	2	0	0	0	0	0	0	0	0	0
AC177922.2_FG002	4	6	8	71	115	151	0	0	0	1	0	2	10	59	46	1	0	0
AC177924.2_FG001	2	6	8	6	1	20	1	0	5	1	16	18	0	6	16	0	4	6
AC177924.2_FG003	47	135	184	54	84	80	9	35	43	100	314	282	42	61	140	13	113	68
AC177926.2_FG003	0	0	0	0	0	0	0	0	0	0	0	0	0	0	0	0	0	0
AC177930.2_FG001	0	4	11	6	15	10	4	7	8	5	5	5	2	11	10	0	2	3
AC177930.2_FG002	0	3	9	3	14	4	2	6	14	2	8	4	1	16	7	2	7	2
AC177936.6_FG008	437	1460	1843	677	1176	1555	236	824	1355	702	1618	1839	431	1491	2036	281	774	701
AC177941.3_FG001	2	5	16	4	18	22	8	10	6	10	9	33	10	24	37	13	31	34
AC177941.3_FG006	0	0	0	0	0	0	0	0	0	0	0	0	0	0	0	0	0	0
AC177946.2_FG004	21	156	124	97	147	225	140	395	428	203	330	661	454	1750	2183	62	423	390
AC177947.2_FG003	3	13	15	15	19	39	14	34	31	4	10	11	3	23	20	9	24	10
AC182105.3_FG006	0	0	0	0	0	0	0	0	0	0	0	0	0	0	0	0	0	0
AC182413.4_FG002	0	4	6	0	1	0	3	1	2	1	1	4	1	0	1	0	0	0
AC182439.4_FG004	0	0	1	0	0	0	0	3	3	0	0	0	0	0	0	4	7	8
AC182482.3_FG003	845	2944	3561	1523	2558	3196	769	1586	2467	1025	3251	3230	964	2190	3170	480	2457	2167
AC182615.4_FG001	0	0	0	0	0	0	0	0	0	1	2	3	0	2	0	0	1	1
AC182617.3_FG001	563	1813	2257	857	1780	2011	601	1642	2134	924	2377	2567	607	1795	2474	258	2235	1679
AC182627.2_FG003	0	0	0	0	0	0	0	0	0	0	0	0	0	0	1	0	0	0
AC182831.3_FG004	0	0	0	0	0	0	0	0	0	0	0	0	0	0	0	0	0	0
AC182838.3_FG006	12	25	38	3	6	6	4	19	14	105	324	288	32	104	134	38	119	109
AC183315.4_FG006	318	905	1151	440	879	1052	118	354	516	179	631	659	213	592	712	85	388	334
AC183319.3_FG001	60	173	229	50	81	104	27	64	109	76	126	174	66	151	268	2	57	37
AC183372.4_FG006	2	3	3	0	0	5	0	1	1	0	0	2	4	3	4	0	0	2
AC183412.5_FG005	107	296	451	236	472	642	98	299	363	143	336	387	131	362	463	60	187	164
AC183413.3_FG006	2	3	0	2	20	2	0	2	2	1	4	4	2	3	2	1	3	2
AC183509.1_FG001	12	40	43	78	157	168	11	43	50	0	13	6	13	46	59	0	0	2
AC183514.3_FG006	0	0	0	0	0	0	0	0	0	0	0	0	0	0	0	0	0	0
AC183817.2_FG002	0	0	0	0	0	0	0	0	0	0	0	0	0	0	0	0	0	0
AC183888.4_FG006	44	122	171	104	189	236	50	213	179	55	124	208	47	130	194	26	246	143
AC183888.4_FG008	0	2	4	0	3	0	0	0	5	0	0	2	2	0	4	3	0	1
AC183914.3_FG004	0	2	0	2	0	0	0	0	3	0	0	0	1	2	0	0	0	1
AC183915.4_FG001	0	0	0	0	1	1	0	0	2	0	0	0	0	0	0	0	0	0
AC183927.3_FG004	47	156	188	37	25	116	22	94	96	16	47	64	3	42	20	4	2	6
AC183928.4_FG001	1	2	3	0	0	3	2	9	2	8	11	13	4	13	26	12	11	8
AC183932.3_FG007	132	662	664	136	265	358	62	173	279	408	1111	1309	318	1134	1284	15	100	90
AC183938.4_FG011	8	21	28	68	10	75	3	4	8	1	13	12	7	32	46	1	10	27
AC183944.4_FG003	0	0	0	0	0	0	0	0	0	0	0	0	0	0	0	0	0	0
AC183950.2_FG002	0	0	0	0	0	0	0	0	0	0	0	0	0	0	0	0	0	0
AC183950.2_FG003	6	12	17	40	45	65	2	8	9	0	0	0	0	0	0	0	0	0
AC183950.2_FG004	14	42	64	52	146	105	12	21	29	4	39	35	6	67	40	2	14	11
AC183950.2_FG005	19	143	135	40	96	97	24	53	77	25	74	112	6	47	43	14	38	43
AC183968.2_FG001	0	5	0	0	1	1	0	0	2	6	44	24	1	9	25	1	6	7
AC184112.4_FG010	0	0	0	0	0	0	0	0	0	0	0	2	0	0	1	0	1	0
AC184116.3_FG001	0	2	1	1	6	11	0	0	1	1	2	3	5	10	6	1	2	0
AC184127.3_FG003	0	1	1	2	1	2	0	0	0	0	0	0	0	1	0	0	0	0
AC184130.4_FG005	0	0	0	0	2	0	0	0	3	3	2	7	0	0	0	0	0	0
AC184130.4_FG012	10	51	63	66	55	119	1	23	51	23	107	101	23	86	135	2	39	18
AC184133.3_FG001	62	170	253	50	71	88	229	562	679	0	1	1	0	1	2	1	0	0
AC184164.2_FG004	0	0	0	0	0	0	0	0	0	0	0	0	0	0	0	0	0	0
AC184164.2_FG006	0	0	0	0	0	0	0	0	0	0	0	0	0	0	0	0	0	0
AC184169.3_FG001	27	155	186	242	454	552	45	105	219	89	191	188	98	317	399	55	157	125
AC184170.4_FG002	0	1	5	18	97	81	4	28	24	2	6	19	6	83	72	5	24	11
AC184171.4_FG002	0	0	0	0	0	0	0	0	0	0	0	0	0	0	0	0	0	0
AC184172.3_FG001	0	0	2	0	0	0	0	1	1	0	0	0	0	0	0	0	2	0
AC184699.3_FG005	3	29	27	20	16	62	2	20	23	16	21	23	8	16	19	13	25	29
AC184764.3_FG003	0	0	0	0	0	0	0	0	0	0	0	0	0	0	0	0	0	0
AC184764.3_FG006	0	0	0	0	0	0	0	0	0	0	0	0	0	0	0	0	0	0
AC184765.4_FG005	5	2	10	15	14	21	0	8	9	4	3	6	3	27	25	2	6	0
AC184771.4_FG003	0	0	0	0	0	0	0	0	0	0	0	0	0	0	0	0	0	0
AC184775.2_FG002	0	0	0	0	0	0	0	0	0	0	0	0	0	0	0	0	0	0
AC184788.2_FG001	4	7	8	116	288	345	0	0	0	0	1	9	24	51	97	1	2	2
AC184789.4_FG002	0	0	0	0	0	0	0	0	0	0	0	0	0	0	0	0	0	0
AC184794.2_FG003	0	0	0	0	0	0	0	0	0	0	0	0	0	0	0	0	0	0
AC184831.3_FG003	110	317	384	166	384	437	73	172	171	92	262	382	176	750	780	25	259	223
AC184831.3_FG005	0	0	0	0	0	0	0	0	0	0	0	1	0	0	0	0	0	0
AC184831.3_FG008	0	0	0	0	0	0	0	0	0	0	0	0	0	0	0	0	0	0
AC184836.3_FG002	0	0	0	0	0	0	0	0	0	0	0	0	0	0	0	0	4	0
AC184857.2_FG006	0	0	0	0	0	0	0	1	0	0	0	0	0	0	0	0	0	1
AC184871.2_FG009	0	0	0	0	0	0	0	0	0	0	0	0	0	0	0	0	0	0
AC185108.3_FG006	0	0	0	0	0	0	0	0	0	0	0	0	0	0	0	0	0	0
AC185108.3_FG010	11	55	49	17	15	35	9	23	31	6	4	12	3	13	28	4	2	11
AC185108.3_FG011	0	0	0	0	0	0	0	0	0	0	0	0	0	0	1	0	3	2
AC185122.3_FG009	0	0	0	0	0	0	0	0	0	0	0	0	0	0	0	0	0	0
AC185126.3_FG006	0	0	2	0	0	0	2	0	0	0	0	1	0	1	0	0	2	0
AC185130.2_FG004	39	107	132	51	215	101	13	29	75	16	78	76	25	71	109	12	81	64
AC185130.2_FG005	1	2	1	4	3	5	1	1	2	1	0	0	0	2	0	0	0	0
AC185217.3_FG004	0	0	0	0	0	0	0	0	0	0	0	0	0	0	0	0	0	0
AC185217.3_FG007	49	153	281	88	62	232	23	50	77	52	90	98	35	116	132	16	41	28
AC185226.4_FG001	916	2832	3643	2480	4758	6335	414	1379	1967	1331	3681	4489	1518	5124	6854	572	1645	1296
AC185252.4_FG002	0	0	0	0	0	0	0	0	0	0	0	0	0	0	0	0	0	0
AC185254.4_FG002	0	2	3	1	3	8	0	0	2	2	5	7	0	6	12	2	6	1
AC185256.3_FG002	0	3	4	32	56	91	3	6	7	4	20	15	24	63	74	4	3	5
AC185256.3_FG003	0	1	0	1	3	0	0	0	0	0	0	0	0	5	0	0	0	0
AC185261.4_FG002	0	0	0	0	0	0	0	0	0	0	0	0	0	0	5	0	0	0
AC185265.3_FG003	0	0	0	0	0	0	0	0	0	0	0	0	0	0	0	0	0	0
AC185276.2_FG004	0	0	3	0	0	0	1	1	1	85	234	237	41	108	229	27	258	273
AC185276.2_FG006	0	8	13	5	10	4	3	4	15	20	63	59	8	34	32	0	20	6
AC185281.5_FG006	12	51	46	25	30	42	9	39	27	5	6	18	8	17	26	2	21	19
AC185300.4_FG002	64	328	377	217	388	479	143	344	550	112	281	365	171	413	666	51	378	276
AC185305.3_FG003	20	49	65	20	34	44	34	63	112	11	37	28	4	44	48	8	37	8
AC185415.3_FG005	159	384	623	176	342	509	68	203	268	182	442	517	78	331	449	49	257	240
AC185422.3_FG005	38	176	138	9	15	17	41	109	90	38	52	78	1	5	9	9	49	62
AC185427.5_FG004	2	15	18	14	0	36	1	7	15	9	12	10	0	17	13	3	1	3
AC185443.3_FG004	0	0	0	0	0	0	0	0	0	0	0	0	0	0	0	0	0	0
AC185460.3_FG004	0	0	0	0	0	0	0	1	0	0	0	0	0	0	0	0	0	0
AC185466.3_FG001	58	107	185	118	223	265	31	129	153	72	271	227	80	238	397	43	138	158
AC185471.3_FG005	71	179	247	83	100	147	20	56	92	76	208	236	38	100	144	0	45	38
AC185473.3_FG005	0	0	0	0	1	1	0	0	3	3	2	0	2	4	2	1	2	0
AC185475.3_FG001	22	71	67	33	92	93	9	28	50	35	61	93	20	71	63	12	55	58
AC185478.4_FG005	8	18	26	1	13	9	0	4	11	3	4	7	0	2	6	0	4	0
AC185478.4_FG007	0	0	0	0	0	0	0	1	1	0	0	2	0	0	0	0	0	1
AC185487.4_FG001	0	0	0	1	2	0	0	0	0	1	0	0	0	0	0	0	0	0
AC185500.3_FG001	13	53	55	64	1	116	39	92	181	3	11	18	24	57	63	3	21	21
AC185501.3_FG001	1	0	0	1	0	0	0	2	2	3	0	1	5	13	21	0	4	2
AC185501.3_FG006	9	30	56	18	1	29	4	15	13	23	46	49	11	31	47	7	12	16
AC185504.4_FG002	0	0	1	0	0	1	0	0	0	0	0	0	1	14	3	0	0	0
AC185522.2_FG002	1	0	9	33	0	82	1	2	8	2	3	6	13	44	55	2	2	2
AC185530.2_FG004	0	0	0	0	0	0	0	0	0	0	0	0	0	0	0	0	0	0
AC185586.4_FG003	0	0	0	0	0	0	0	0	0	0	0	0	0	0	0	0	0	0
AC185587.3_FG003	2	0	4	1	0	0	0	0	0	0	0	0	0	0	0	0	0	0
AC185588.2_FG002	23	7	47	44	94	131	4	1	27	15	12	35	14	52	50	1	5	7
AC185593.3_FG003	5	4	3	1	3	2	0	2	1	4	22	15	2	0	1	2	17	1
AC185605.3_FG003	0	0	0	0	0	0	0	0	0	0	0	0	0	0	0	0	0	0
AC185610.3_FG001	0	0	0	0	0	3	0	1	0	0	0	0	0	0	0	0	0	0
AC185611.3_FG001	0	0	0	0	0	0	0	0	0	0	0	0	0	0	0	0	0	0
AC185623.4_FG010	0	0	4	0	0	0	0	1	0	0	0	0	0	0	0	0	0	0
AC185623.4_FG012	0	0	0	0	0	0	0	0	0	0	0	0	0	0	0	0	0	0
AC185628.3_FG010	0	1	0	0	0	0	0	0	0	0	0	1	0	0	2	0	0	0
AC185642.4_FG001	3	7	11	5	0	13	0	2	9	3	5	3	1	8	8	3	4	2
AC185648.3_FG007	7	29	48	16	16	36	4	11	11	0	0	0	0	0	0	0	0	0
AC185649.2_FG003	0	0	0	0	0	0	0	2	2	0	0	0	0	0	0	0	0	0
AC185655.3_FG004	0	0	0	0	0	0	0	0	0	0	0	0	0	0	0	0	0	0
AC185655.3_FG005	0	0	0	0	0	0	0	0	0	0	0	0	0	0	0	0	0	0
AC185656.3_FG002	0	0	2	0	0	0	0	2	0	0	0	0	0	0	0	1	6	11
AC185660.3_FG003	0	0	0	0	0	0	2	9	21	0	0	0	0	0	0	1	12	7
AC186009.3_FG001	0	0	0	0	0	0	0	0	0	0	8	5	0	6	3	0	1	0
AC186013.3_FG001	0	0	0	0	0	0	0	0	0	0	0	0	7	72	61	0	0	0
AC186145.3_FG002	4	5	2	11	18	14	12	26	23	3	22	9	2	26	13	3	20	21
AC186147.3_FG008	69	187	226	107	164	168	93	240	389	194	354	475	37	122	136	20	204	158
AC186156.3_FG004	0	1	0	8	43	37	0	0	3	1	12	10	3	43	61	0	0	5
AC186156.3_FG005	0	1	0	11	41	43	0	0	3	1	15	10	8	49	80	0	0	9
AC186164.3_FG001	8	32	37	18	54	52	9	8	13	20	53	43	17	72	102	8	35	16
AC186166.3_FG008	117	400	496	184	406	465	105	414	541	347	939	1157	381	1144	1611	114	1494	1256
AC186189.3_FG004	0	0	0	0	0	0	0	0	0	0	0	0	0	0	0	0	0	0
AC186189.3_FG005	9	56	61	6	0	40	11	50	66	0	0	0	0	0	0	0	0	0
AC186195.4_FG001	0	0	2	0	0	0	1	0	0	0	0	2	0	0	0	0	0	0
AC186231.4_FG002	129	542	686	546	1002	1508	123	538	614	17	87	55	21	72	71	27	61	76
AC186233.3_FG007	2	5	18	14	2	22	0	2	3	2	4	23	5	12	14	8	2	9
AC186283.4_FG002	4	15	15	11	3	20	0	7	7	2	19	12	7	23	18	1	6	4
AC186284.3_FG007	0	4	7	3	8	9	0	0	11	6	2	13	7	14	20	10	8	13
AC186287.7_FG005	2	1	12	10	6	18	3	16	25	0	3	5	0	18	14	12	32	31
AC186309.3_FG002	0	0	0	0	0	0	0	0	0	0	0	0	0	0	0	0	0	0
AC186309.3_FG006	0	0	0	0	0	0	0	0	0	0	0	0	0	0	0	0	0	0
AC186310.4_FG004	0	3	3	1	12	12	1	3	2	4	1	4	2	6	4	12	11	9
AC186322.4_FG003	0	0	0	0	0	0	34	156	148	0	0	0	0	0	0	61	318	282
AC186322.4_FG005	3	0	2	0	0	0	9	16	19	0	2	0	0	0	0	0	8	2
AC186329.3_FG006	0	1	0	0	0	0	0	0	1	0	6	5	0	0	2	61	285	221
AC186337.3_FG003	0	0	0	0	0	0	0	0	0	0	0	0	0	0	0	0	0	0
AC186375.3_FG001	0	0	0	0	0	0	0	0	0	0	0	0	0	0	0	0	0	0
AC186404.3_FG002	0	0	0	0	0	0	0	0	0	0	0	0	0	0	0	0	0	0
AC186406.4_FG006	0	0	0	0	0	0	0	0	0	0	0	0	0	0	0	0	0	0
AC186408.5_FG005	0	0	0	0	0	0	0	0	0	0	0	0	0	0	0	0	0	1
AC186412.4_FG011	0	0	0	0	0	0	0	0	0	0	0	0	0	0	0	0	0	0
AC186417.3_FG004	0	0	0	0	0	0	0	0	0	0	0	0	0	0	0	0	0	0
AC186417.3_FG006	1	10	10	2	12	7	1	3	7	0	1	1	0	1	6	1	1	1
AC186424.4_FG009	0	0	0	0	0	0	0	0	0	0	0	0	0	0	0	0	0	0
AC186431.5_FG001	0	0	0	0	0	0	0	0	1	0	0	0	0	0	0	0	0	0
AC186433.4_FG001	4	10	15	7	6	18	1	6	0	1	5	4	0	8	3	0	0	0
AC186493.4_FG002	0	0	0	0	0	6	0	0	1	6	0	12	17	36	62	2	2	0
AC186500.3_FG001	4	23	28	3	0	26	4	14	19	9	18	13	1	20	9	5	30	20
AC186506.3_FG001	0	0	0	0	0	0	0	2	0	0	0	0	0	1	0	0	0	0
AC186512.3_FG007	411	1501	1806	657	1189	1512	1807	5022	7505	318	731	905	217	732	1168	725	4180	3543
AC186519.4_FG002	0	0	0	0	0	0	0	0	0	0	0	0	0	0	6	0	0	0
AC186524.3_FG005	3	21	24	19	16	38	3	29	28	2	2	0	0	2	0	1	1	1
AC186524.3_FG006	0	0	0	0	0	0	0	0	0	0	0	0	0	0	0	0	0	0
AC186563.4_FG004	0	0	6	1	0	2	0	0	0	0	0	0	0	0	0	0	0	0
AC186577.3_FG006	18	64	83	33	51	78	7	41	15	59	125	146	4	25	31	0	10	5
AC186579.3_FG007	0	0	0	0	0	0	0	0	0	0	0	0	0	0	2	0	0	0
AC186581.3_FG003	0	0	0	0	0	1	0	2	1	0	3	1	1	2	2	0	0	1
AC186583.3_FG004	0	0	0	0	0	0	0	0	0	0	0	0	0	0	0	0	0	0
AC186585.4_FG002	1	0	0	0	0	0	0	2	0	0	0	0	0	0	0	0	3	0
AC186590.3_FG005	0	2	2	7	10	7	0	3	5	0	0	2	5	28	31	0	2	0
AC186590.3_FG006	0	2	2	6	13	7	0	2	3	0	0	2	5	28	33	0	1	0
AC186592.3_FG002	58	208	242	354	340	891	50	142	177	63	133	172	109	402	387	40	64	61
AC186592.3_FG003	0	0	0	14	25	25	0	4	6	0	5	0	4	13	5	1	0	0
AC186602.4_FG003	0	0	2	0	0	1	0	0	0	0	0	0	0	0	0	0	0	0
AC186603.6_FG003	8	35	24	4	4	4	14	15	44	2	10	10	0	7	5	5	50	41
AC186606.4_FG003	10	39	42	9	10	10	167	634	836	34	52	83	16	48	35	64	456	312
AC186611.4_FG005	0	0	0	0	0	0	0	0	0	0	0	0	0	0	0	0	0	0
AC186613.4_FG003	0	0	0	0	0	0	0	0	0	0	0	0	0	0	0	0	0	0
AC186619.3_FG001	0	0	0	0	0	0	0	0	0	0	1	8	0	0	5	0	0	0
AC186647.3_FG001	0	0	0	0	0	0	0	0	0	0	0	0	0	0	0	0	0	0
AC186653.4_FG005	0	0	0	0	0	0	0	3	0	0	0	0	0	0	0	0	0	12
AC186656.4_FG004	2	0	12	2	1	3	4	0	2	0	2	6	2	1	2	1	7	0
AC186656.4_FG012	0	0	0	0	0	0	0	0	0	0	0	0	0	0	0	0	0	0
AC186663.3_FG006	0	0	0	0	0	0	0	0	0	0	0	0	0	0	0	4	11	5
AC186667.3_FG007	0	0	0	0	0	0	0	0	0	0	0	2	0	0	0	0	0	0
AC186669.3_FG002	59	149	231	54	138	112	39	87	137	47	111	147	44	97	113	79	32	43
AC186684.4_FG001	1	0	2	6	0	3	0	1	0	0	0	1	0	1	1	0	0	4
AC186691.4_FG006	0	0	0	0	0	0	0	0	0	0	0	0	0	4	2	1	8	4
AC186743.4_FG003	2	1	2	0	0	0	2	12	14	5	17	19	4	6	17	6	34	26
AC186781.4_FG006	8	27	33	10	42	41	5	23	36	3	4	9	5	8	32	0	8	7
AC186782.4_FG003	5	20	18	10	28	27	0	2	2	0	2	22	1	7	12	2	1	5
AC186785.4_FG002	0	0	0	0	0	0	0	0	0	0	0	0	0	0	0	0	0	0
AC186789.4_FG001	0	0	0	0	0	0	0	0	0	0	0	0	0	0	0	0	0	0
AC186800.3_FG005	0	0	0	1	2	2	2	0	0	0	0	0	0	2	0	0	2	2
AC186807.4_FG002	1	1	3	1	0	5	0	1	2	1	3	4	0	6	8	0	0	2
AC186815.3_FG003	2	6	6	3	10	4	4	1	6	2	1	4	0	6	0	0	1	0
AC186828.3_FG001	0	0	5	0	0	0	0	0	0	0	0	0	0	0	0	0	0	0
AC186845.4_FG009	37	195	197	181	348	332	84	249	287	343	1058	1044	205	766	762	24	200	205
AC186897.4_FG016	2	6	6	1	1	0	1	2	6	3	7	13	3	13	14	0	0	2
AC186902.4_FG006	0	0	0	0	0	0	0	0	0	0	0	0	0	0	0	2	0	2
AC186902.4_FG009	0	8	1	4	3	10	0	0	0	0	0	1	0	2	2	0	0	0
AC186904.4_FG007	0	0	0	0	0	2	0	0	0	0	0	0	0	0	0	0	0	2
AC186905.3_FG013	0	0	0	0	3	2	0	0	3	3	2	0	2	3	2	1	2	1
AC187037.4_FG008	3	6	5	3	5	2	3	6	5	1	2	1	0	4	1	0	3	4
AC187046.3_FG009	0	0	0	0	0	0	0	0	0	0	0	1	1	0	3	0	0	0
AC187056.3_FG002	0	0	0	0	0	0	0	0	0	0	0	0	0	0	0	0	0	0
AC187065.3_FG003	2	4	3	25	71	58	6	30	32	1	0	4	12	92	41	0	11	10
AC187067.4_FG001	0	0	0	0	0	0	0	0	0	0	0	0	0	0	0	0	0	0
AC187072.4_FG001	0	0	0	0	0	0	0	0	0	0	0	0	0	0	0	0	0	0
AC187072.4_FG002	0	0	0	0	0	0	0	0	0	0	0	0	0	0	0	0	0	0
AC187080.3_FG006	8	14	32	35	72	124	20	89	108	50	36	134	10	51	41	126	139	118
AC187080.3_FG007	0	6	7	2	5	18	2	4	0	3	9	18	0	4	13	0	2	3
AC187082.3_FG003	4	1	4	0	2	2	0	2	2	27	25	45	1	16	11	3	13	24
AC187086.3_FG004	0	0	0	0	0	0	0	0	0	0	0	0	0	0	0	0	0	0
AC187088.3_FG002	0	0	0	0	0	0	0	0	0	0	4	0	0	0	0	0	0	0
AC187090.3_FG003	0	0	0	0	0	0	0	0	0	0	0	0	0	0	0	0	0	0
AC187090.3_FG011	0	0	5	0	1	1	0	0	0	28	76	94	15	97	60	1	5	12
AC187092.6_FG003	0	0	0	0	0	0	0	0	0	0	0	0	0	0	0	0	0	0
AC187096.5_FG001	0	0	0	0	0	0	0	2	0	0	0	0	0	0	0	1	2	1
AC187098.4_FG011	166	608	782	217	604	560	91	270	431	246	664	710	123	366	558	82	329	351
AC187099.5_FG005	1	4	13	37	45	57	8	31	8	9	44	38	11	23	77	10	45	36
AC187142.3_FG007	1	5	4	1	4	0	0	1	2	0	1	1	1	2	1	0	1	0
AC187157.4_FG001	7	33	35	14	34	47	2	7	29	7	10	18	1	22	19	4	13	21
AC187157.4_FG002	98	345	389	194	329	489	78	173	317	207	485	598	148	579	759	23	175	113
AC187157.4_FG005	226	690	970	359	549	865	112	336	532	229	616	629	156	351	449	139	824	636
AC187160.3_FG003	0	1	2	0	0	3	0	1	2	0	0	0	0	0	0	0	0	0
AC187207.3_FG006	27	57	90	64	96	222	22	74	94	22	73	95	49	154	196	39	75	74
AC187209.5_FG003	0	0	0	1	1	0	0	2	1	0	0	0	1	1	3	1	4	7
AC187209.5_FG010	5	12	26	11	1	18	89	232	308	1	3	2	1	0	0	0	0	0
AC187212.3_FG011	0	0	0	2	2	1	0	2	0	0	0	0	0	0	0	0	0	0
AC187217.4_FG004	0	0	0	0	0	0	0	0	0	0	0	0	0	0	0	0	0	0
AC187222.4_FG001	8	7	10	31	30	55	4	2	4	2	2	2	6	41	39	0	0	0
AC187235.3_FG003	0	0	0	0	0	4	0	0	0	0	0	0	0	0	0	0	0	0
AC187241.4_FG009	0	0	0	0	0	0	0	0	0	0	0	0	0	0	0	0	0	0
AC187243.3_FG005	3	38	37	11	34	23	2	12	14	4	7	6	5	7	16	0	8	2
AC187262.4_FG007	63	360	324	101	199	192	32	87	174	512	1282	1764	233	477	870	0	10	43
AC187263.4_FG001	138	464	568	238	475	664	165	510	576	172	558	482	113	534	566	139	539	407
AC187279.3_FG003	7	39	35	72	225	200	100	215	344	5	24	23	39	107	83	29	220	150
AC187279.3_FG004	0	0	0	0	0	0	0	0	0	0	0	0	0	3	0	0	0	0
AC187283.3_FG005	0	0	0	0	0	0	0	0	0	0	0	0	0	0	0	0	0	0
AC187393.3_FG001	10	53	59	38	98	111	8	25	18	2	3	11	0	5	4	0	1	1
AC187404.3_FG003	0	2	1	0	3	1	0	0	2	4	0	6	0	8	5	0	0	0
AC187404.3_FG006	0	1	2	0	0	1	0	2	0	0	0	0	0	0	0	0	0	0
AC187460.4_FG002	0	0	0	0	0	0	0	0	0	0	0	0	0	0	0	0	0	0
AC187469.3_FG005	0	0	0	0	0	0	0	0	0	0	0	0	0	0	0	0	0	0
AC187485.3_FG001	0	0	0	0	0	0	0	0	0	2	0	3	0	0	3	0	0	0
AC187551.3_FG002	40	149	156	104	228	269	38	94	132	81	286	244	52	255	208	27	114	90
AC187560.5_FG003	2	5	4	1	0	0	3	4	4	0	0	0	0	1	2	0	2	0
AC187567.4_FG004	12	43	63	42	46	93	12	20	34	30	73	70	18	58	84	0	22	18
AC187782.4_FG009	1	0	0	0	0	0	1	2	4	1	0	0	0	0	0	0	2	8
AC187789.3_FG001	0	0	0	0	0	0	0	0	0	1	0	2	0	0	0	0	0	0
AC187800.4_FG003	0	0	0	0	0	0	0	0	0	0	1	0	0	0	0	0	0	0
AC187802.3_FG008	0	0	0	6	6	3	0	1	2	0	0	0	4	26	21	0	1	0
AC187809.3_FG005	0	1	2	1	4	6	0	0	0	1	3	1	2	4	9	0	1	1
AC187813.3_FG002	0	0	0	0	0	1	0	0	0	0	0	0	0	0	0	0	0	0
AC187818.3_FG004	0	0	0	0	0	0	0	0	0	0	0	0	0	0	0	2	6	0
AC187826.3_FG007	0	0	0	0	0	0	0	0	1	0	0	0	0	0	0	0	0	0
AC187843.3_FG001	0	0	6	0	86	0	0	8	2	0	0	0	0	0	5	0	5	0
AC187843.3_FG006	44	119	106	84	190	185	13	61	61	54	112	210	74	115	254	1	82	75
AC187843.3_FG010	0	0	0	0	0	0	0	0	0	0	0	0	0	1	6	0	3	0
AC187870.3_FG002	0	0	0	0	0	0	0	0	0	0	0	0	0	0	0	0	0	0
AC187872.3_FG005	0	0	0	0	0	0	0	0	0	0	0	1	0	0	0	0	0	0
AC187879.3_FG001	0	0	0	19	26	39	0	1	2	0	1	0	8	44	44	0	0	0
AC187885.3_FG002	10	19	18	6	14	20	6	3	12	1	2	2	0	2	1	0	10	1
AC187887.3_FG008	0	0	0	0	1	1	0	0	0	0	0	1	0	0	0	0	0	0
AC187891.3_FG006	1	1	3	7	6	4	57	32	101	84	363	537	31	150	124	8	36	28
AC187895.2_FG001	0	0	0	0	0	0	0	0	0	0	0	0	0	0	0	0	0	0
AC187895.2_FG002	0	0	0	0	0	0	0	0	0	0	0	0	0	0	0	0	0	0
AC187896.3_FG006	1	0	4	0	0	0	0	0	0	0	1	0	0	0	2	0	0	2
AC187899.3_FG002	0	0	0	0	0	0	0	0	0	0	0	0	0	0	0	0	0	0
AC187901.4_FG004	5	10	21	7	0	22	2	7	4	0	0	0	0	0	0	0	0	0
AC187903.3_FG004	0	0	1	0	2	0	0	0	0	0	0	0	1	1	0	0	0	0
AC187910.5_FG002	1	1	4	3	4	3	0	1	1	0	0	0	0	0	0	0	0	0
AC188000.3_FG003	10	54	50	14	18	23	15	51	68	0	0	0	0	0	0	0	0	0
AC188001.3_FG009	0	4	5	7	7	13	8	11	28	3	3	5	6	26	19	1	17	5
AC188003.3_FG012	2	0	0	4	24	34	4	9	36	0	0	0	5	5	18	1	12	11
AC188023.3_FG005	468	1433	1619	800	1329	1865	381	1067	1320	730	1341	1906	580	1103	2176	151	1811	1405
AC188023.3_FG011	7	12	13	9	9	14	7	8	16	3	2	4	0	5	4	0	0	4
AC188036.3_FG003	0	0	1	1	0	5	0	6	1	0	0	0	0	0	0	0	0	0
AC188128.3_FG002	2	3	15	0	0	6	1	8	16	1	4	8	1	7	2	6	13	15
AC188134.2_FG011	0	0	0	0	0	1	0	0	2	0	7	6	1	24	23	4	20	15
AC188195.2_FG003	0	0	0	0	0	0	0	0	0	0	0	0	0	0	0	0	0	0
AC188195.2_FG004	0	0	0	0	0	0	0	0	0	0	0	0	0	0	0	0	0	0
AC188195.2_FG005	0	0	0	0	0	0	0	0	0	0	0	0	0	0	0	0	0	0
AC188296.3_FG004	5	2	10	33	102	101	0	2	0	3	8	10	15	67	46	0	5	2
AC188582.3_FG002	0	0	0	0	0	0	0	0	0	0	0	0	0	0	0	0	0	0
AC188583.4_FG003	0	1	22	16	12	37	0	4	26	12	21	21	2	11	22	0	2	0
AC188612.3_FG009	0	0	0	0	1	0	0	7	7	0	0	0	0	0	0	0	0	0
AC188710.4_FG006	124	406	567	140	317	324	643	2005	2447	54	88	145	1	13	12	227	1015	926
AC188718.3_FG005	0	0	0	1	0	0	0	0	0	1	6	5	1	0	5	6	0	0
AC188718.3_FG011	0	0	0	0	0	0	0	0	0	0	1	0	0	0	0	0	0	0
AC188718.3_FG015	0	0	0	0	1	0	0	0	0	0	0	2	0	0	1	0	0	1
AC188721.3_FG001	8	15	31	257	646	698	26	63	86	4	22	31	122	536	398	3	22	11
AC188722.3_FG002	0	0	1	0	0	0	0	0	0	0	0	0	0	0	0	0	0	0
AC188723.3_FG001	0	0	0	0	0	0	0	0	0	0	0	0	0	0	0	0	0	0
AC188724.3_FG006	0	0	0	0	0	0	0	0	0	0	0	0	0	0	0	0	0	0
AC188727.3_FG003	0	0	0	0	0	4	0	0	2	0	0	0	0	0	0	0	0	0
AC188735.3_FG001	0	0	0	0	0	0	0	0	0	0	0	0	0	0	0	0	0	0
AC188744.3_FG009	0	0	0	0	0	0	0	0	1	0	0	0	0	0	0	0	0	0
AC188745.3_FG001	0	0	1	0	0	1	0	8	8	0	0	5	0	0	0	6	8	1
AC188752.3_FG008	29	95	109	49	132	168	9	17	60	44	112	132	7	132	106	40	32	42
AC188753.3_FG004	3	12	19	17	10	22	1	8	12	2	6	5	1	19	6	2	8	4
AC188755.3_FG001	0	3	4	72	207	191	3	2	2	0	0	0	0	0	0	0	0	0
AC188756.2_FG004	0	2	2	2	0	0	0	0	5	0	1	1	0	0	2	0	0	1
AC188757.4_FG004	5	3	1	3	7	6	0	8	3	0	0	2	2	14	17	0	3	5
AC188831.3_FG005	7	34	77	19	42	58	21	94	127	32	73	63	10	44	81	5	58	66
AC188838.3_FG005	18	46	54	26	54	75	16	48	54	119	404	414	98	400	528	47	466	402
AC188964.3_FG002	0	0	0	0	0	0	0	0	0	0	0	0	0	0	0	0	0	0
AC188978.3_FG008	0	0	0	0	0	0	0	0	0	0	0	0	0	0	0	0	0	0
AC189044.2_FG005	0	0	0	1	0	1	0	0	0	0	0	0	2	0	2	0	1	0
AC189048.2_FG001	1	0	0	0	0	8	2	9	9	0	2	0	0	2	0	5	3	3
AC189052.3_FG003	0	0	0	0	0	1	0	0	0	0	0	0	0	0	0	0	0	0
AC189056.3_FG001	0	0	0	0	0	0	0	0	0	0	0	0	0	0	0	0	0	0
AC189060.4_FG007	0	0	0	0	0	0	0	0	0	0	0	0	0	0	0	0	0	0
AC189078.3_FG004	0	0	0	0	0	0	0	0	0	0	2	2	0	12	12	0	0	0
AC189084.3_FG002	0	0	0	0	0	0	0	0	0	0	0	0	0	0	0	0	0	0
AC189280.3_FG001	72	210	272	116	109	254	47	152	237	0	0	0	0	1	0	0	0	0
AC189694.3_FG003	0	0	1	1	0	0	1	0	1	1	0	5	1	1	1	1	0	0
AC189750.4_FG004	5147	18933	22008	5609	11351	13561	8667	27629	34683	6166	14475	17925	1724	4695	6527	8529	44552	39069
AC189752.3_FG003	0	1	0	0	0	0	0	0	0	0	0	0	0	0	0	0	0	0
AC189753.3_FG002	1	2	6	0	1	3	1	2	5	0	1	0	0	0	0	0	0	1
AC189770.3_FG002	0	0	0	0	6	8	0	1	0	1	3	2	0	2	2	0	2	0
AC189771.3_FG001	0	0	0	0	0	0	0	0	0	0	0	0	0	0	0	0	0	0
AC189792.3_FG005	2	4	6	10	29	33	0	6	9	6	9	13	18	57	71	0	4	2
AC189795.3_FG001	0	0	0	3	2	9	13	7	29	12	38	46	4	9	29	0	2	5
AC189796.3_FG004	8	0	0	0	0	0	0	0	0	5	0	4	0	3	1	0	0	0
AC189879.3_FG003	560	1634	2009	1574	2499	3531	544	1372	2075	2131	6149	6848	951	4085	4936	479	1842	1738
AC189883.3_FG002	0	0	0	0	0	0	0	0	0	0	0	0	0	0	0	0	0	0
AC190035.1_FG005	0	0	1	0	0	0	0	0	0	0	1	4	0	1	0	0	1	0
AC190225.2_FG001	0	0	0	0	0	0	0	0	0	0	2	0	0	0	0	0	0	0
AC190480.1_FG007	0	0	0	0	2	1	0	0	0	0	6	6	4	4	10	0	0	1
AC190485.1_FG004	0	0	0	0	0	0	0	1	0	0	0	0	0	0	0	0	0	0
AC190491.1_FG002	0	0	0	0	0	0	0	0	0	6	13	5	3	2	8	0	5	1
AC190496.1_FG002	10	15	22	0	10	10	7	12	19	21	60	51	2	3	12	4	25	14
AC190498.1_FG007	0	0	0	0	0	0	0	0	0	3	0	9	0	0	0	0	0	0
AC190507.1_FG007	0	0	0	0	0	0	0	0	0	0	2	3	0	1	0	0	0	1
AC190526.3_FG004	36	86	121	11	47	75	42	128	250	23	74	118	3	14	49	9	52	49
AC190544.2_FG004	4	14	16	3	14	18	11	22	24	0	0	2	0	0	0	0	0	0
AC190549.3_FG004	4	10	15	3	5	3	23	59	91	0	3	3	0	0	0	0	0	4
AC190560.2_FG002	0	2	1	3	2	2	1	0	2	1	1	1	2	4	6	1	0	0
AC190565.2_FG003	0	0	0	0	0	0	0	0	0	0	0	0	0	0	0	0	0	0
AC190570.3_FG003	0	0	1	0	0	0	1	0	0	0	1	0	0	1	0	0	0	1
AC190572.4_FG001	0	0	0	0	0	0	0	0	0	0	0	0	0	0	0	0	0	0
AC190576.2_FG002	0	0	0	0	0	0	0	0	0	0	0	0	0	0	0	1	0	0
AC190587.3_FG005	22	29	52	20	52	62	12	14	40	19	65	87	17	64	51	46	43	52
AC190589.2_FG002	0	0	0	0	0	1	0	0	0	0	0	0	0	5	0	0	6	0
AC190590.3_FG001	8	14	16	23	46	98	1	11	3	2	15	22	24	106	136	2	8	4
AC190609.3_FG001	2	2	4	0	3	0	0	3	2	0	3	2	2	2	2	0	0	0
AC190609.3_FG002	1338	3527	4802	3121	4995	5631	1186	3480	4789	2963	7020	7953	2164	3257	8054	349	3739	3018
AC190609.3_FG003	58	196	235	165	266	329	40	156	224	82	213	270	96	229	364	9	149	119
AC190609.3_FG004	380	965	1139	340	600	830	201	633	878	358	1061	1202	182	604	761	113	668	546
AC190609.3_FG005	8	23	26	10	21	20	0	4	3	0	12	8	2	19	17	0	2	0
AC190613.3_FG001	19	67	79	42	66	114	37	61	140	35	123	116	30	91	99	58	37	25
AC190614.3_FG004	0	0	0	0	0	0	0	0	0	0	0	7	0	4	0	0	4	2
AC190623.3_FG001	34717	110500	138699	33993	60491	75146	17032	53002	66505	37324	62382	104380	30862	57275	109734	7074	74834	62637
AC190623.3_FG002	4	2	2	0	4	2	4	1	10	9	33	37	0	4	8	2	2	7
AC190628.4_FG007	1391	4460	5760	3499	6244	8971	705	2324	3008	1917	5127	6033	1955	7081	8881	1045	3193	2745
AC190630.2_FG001	0	0	0	0	0	0	0	0	0	4	15	10	2	10	13	0	13	8
AC190632.2_FG004	0	0	0	0	0	0	0	0	0	0	0	0	0	0	0	0	0	0
AC190634.1_FG005	2	11	9	7	4	7	0	1	7	4	5	8	2	5	8	0	1	1
AC190636.3_FG005	25	159	186	55	111	168	16	48	53	76	103	176	59	126	204	2	87	56
AC190638.3_FG001	0	0	0	0	0	0	2	9	21	0	0	0	0	0	0	1	10	8
AC190643.4_FG011	0	0	0	0	0	0	0	1	0	0	2	0	0	0	0	0	0	0
AC190652.3_FG001	3	7	18	23	30	34	1	3	0	10	25	24	4	15	28	0	6	7
AC190665.3_FG006	0	0	0	0	0	0	0	0	0	0	0	0	0	0	0	0	1	2
AC190671.4_FG003	0	0	0	0	0	0	0	0	0	0	0	0	0	0	0	0	0	0
AC190677.3_FG003	0	0	0	0	0	0	0	0	0	0	0	0	0	0	0	0	0	0
AC190685.3_FG005	0	3	0	0	1	5	0	1	0	0	0	0	0	1	0	0	0	0
AC190688.3_FG006	0	0	0	0	0	0	0	0	0	0	0	2	0	1	0	0	0	1
AC190693.1_FG009	0	0	0	0	0	0	0	0	0	0	0	0	0	0	0	0	0	0
AC190695.3_FG003	2	1	0	0	2	0	0	1	0	0	0	0	0	0	0	0	0	0
AC190701.3_FG001	0	0	0	0	0	0	0	0	0	0	0	0	0	0	0	0	0	0
AC190716.3_FG001	2	25	25	4	1	10	8	23	17	0	0	0	0	0	0	0	1	0
AC190734.2_FG003	0	0	0	0	0	0	0	3	2	2	0	0	0	0	0	0	0	0
AC190740.2_FG004	58	185	202	90	22	204	37	112	182	11	39	49	7	44	80	15	19	24
AC190743.3_FG012	78	343	370	195	135	319	90	286	340	135	330	364	72	252	336	41	237	276
AC190744.2_FG010	0	0	0	0	0	0	0	0	0	0	0	0	0	0	0	0	0	0
AC190749.3_FG006	6	4	12	0	2	8	1	26	12	8	17	4	1	0	4	3	10	0
AC190750.2_FG014	602	1747	2221	2187	5456	4543	298	1108	1354	818	3104	2910	1412	4914	6734	266	1271	1283
AC190751.4_FG008	0	0	0	0	0	0	0	0	0	0	0	0	0	0	1	0	0	0
AC190756.4_FG007	0	0	0	0	0	0	0	0	0	0	0	0	0	0	0	0	0	0
AC190757.3_FG001	0	0	0	1	4	0	0	0	0	0	0	2	0	0	1	0	1	0
AC190763.3_FG002	0	0	0	4	8	5	0	13	9	0	1	4	0	7	6	0	1	2
AC190771.2_FG003	0	1	0	0	0	0	1	1	0	4	13	16	4	35	15	1	16	17
AC190772.4_FG011	2	97	54	0	0	0	0	2	5	7	4	12	2	11	9	2	22	23
AC190788.2_FG004	7	26	34	13	17	37	0	10	15	10	10	31	9	28	17	0	9	5
AC190788.2_FG005	40	132	212	62	144	234	24	89	128	44	131	152	16	122	113	16	70	35
AC190789.3_FG005	0	0	0	0	0	0	0	1	2	0	0	0	1	0	0	0	0	0
AC190792.2_FG006	14	73	71	21	40	82	17	73	78	30	79	104	19	68	75	7	57	55
AC190799.2_FG010	0	0	0	0	0	0	0	0	0	0	0	0	0	0	0	0	0	0
AC190807.2_FG001	0	0	0	0	0	0	0	0	0	0	0	0	0	0	0	0	1	0
AC190809.2_FG002	0	0	0	0	0	0	0	0	0	0	0	0	0	0	0	0	0	0
AC190811.1_FG003	0	0	0	0	0	0	0	0	0	0	0	0	0	0	0	0	0	0
AC190812.3_FG006	1	9	5	0	3	2	1	1	2	0	0	0	0	0	0	0	0	0
AC190816.3_FG007	143	403	574	233	378	516	129	393	514	43	129	116	31	110	136	96	208	160
AC190832.2_FG003	0	0	0	0	0	0	0	0	0	0	0	0	2	0	1	1	0	0
AC190832.2_FG006	0	0	0	0	0	0	0	0	0	0	0	0	0	1	0	0	0	0
AC190834.3_FG005	0	0	2	0	0	17	0	0	1	0	0	0	13	39	46	0	0	0
AC190841.2_FG007	9	33	15	25	26	47	2	18	23	14	36	35	11	32	38	4	24	14
AC190851.3_FG003	0	0	0	0	0	0	0	0	0	0	0	0	0	0	0	0	0	0
AC190858.3_FG004	0	0	0	0	2	0	0	0	2	0	0	0	0	0	0	3	0	0
AC190858.3_FG005	0	0	2	1	0	0	0	0	0	0	0	1	0	1	0	0	0	0
AC190882.3_FG003	1	8	28	5	16	4	0	5	3	1	5	8	1	7	8	1	3	6
AC190883.2_FG005	0	0	0	0	0	0	0	0	0	1	0	0	1	4	0	0	0	0
AC190885.4_FG006	76	161	184	46	111	120	67	184	185	47	104	126	30	131	235	50	486	383
AC190909.3_FG004	418	1422	1645	1950	3656	4623	348	953	1315	980	2987	3285	940	4098	4800	375	776	896
AC190913.3_FG002	0	6	6	4	290	12	0	0	8	1	2	0	0	0	2	0	4	6
AC190915.3_FG007	90	240	300	112	196	270	33	169	183	34	92	111	21	53	50	16	65	36
AC190922.3_FG007	20	95	105	42	62	104	10	32	56	17	50	55	48	142	138	7	72	41
AC190925.2_FG002	15	70	88	53	100	121	13	22	48	32	90	77	31	71	104	2	39	45
AC190932.3_FG008	0	0	0	0	0	1	0	0	4	2	2	0	1	2	4	1	0	0
AC190933.3_FG004	19	33	50	13	29	39	16	51	50	32	106	159	25	58	92	10	89	66
AC190934.3_FG003	0	0	0	0	0	0	0	0	0	0	0	0	0	0	0	0	0	0
AC190978.3_FG007	0	0	0	0	0	0	0	0	0	2	5	5	0	0	1	0	1	1
AC190985.3_FG006	25	62	101	65	98	121	7	20	43	24	48	81	13	74	90	10	37	17
AC190990.2_FG005	36	122	167	33	32	66	31	71	137	0	0	0	0	0	0	0	0	0
AC190999.2_FG004	114	364	611	180	310	443	56	159	255	325	1031	1175	192	486	749	62	265	273
AC191009.3_FG004	232	963	1064	324	726	860	277	833	1126	432	1005	1185	208	719	973	124	789	656
AC191012.2_FG001	9	16	20	19	24	54	2	10	10	9	13	6	6	30	34	3	6	5
AC191040.2_FG002	0	9	0	0	0	1	0	0	0	4	8	34	0	13	28	0	0	0
AC191042.4_FG001	6	8	16	2	14	23	4	16	10	10	24	25	19	35	74	14	38	19
AC191048.2_FG006	30	159	132	44	108	107	23	61	112	80	156	228	25	135	144	3	37	44
AC191049.3_FG007	0	0	1	0	1	0	0	2	0	1	6	8	0	8	2	3	6	2
AC191050.3_FG003	7	36	44	0	192	4	15	74	56	0	0	0	0	1	0	0	0	0
AC191064.3_FG007	0	0	0	0	0	0	0	0	0	5	1	2	1	0	1	0	0	2
AC191067.3_FG005	0	0	0	0	0	0	0	0	0	0	0	0	0	0	0	0	0	2
AC191069.3_FG004	169	477	613	299	579	624	125	374	462	140	271	277	61	155	273	19	124	103
AC191069.3_FG007	0	0	2	0	0	1	0	0	0	0	0	0	0	0	6	0	0	0
AC191070.3_FG006	1	0	1	0	1	1	2	1	6	2	13	13	2	28	30	2	30	26
AC191071.3_FG001	0	0	0	0	0	0	0	0	0	0	0	0	0	2	0	0	0	0
AC191073.2_FG001	0	0	0	0	0	0	0	0	0	0	0	0	0	0	0	0	0	0
AC191073.2_FG003	1	4	7	7	4	9	0	5	3	0	2	3	0	5	1	0	0	1
AC191097.3_FG007	143	426	526	34	155	180	88	324	332	194	413	477	40	193	161	94	396	401
AC191098.3_FG002	0	0	2	0	0	0	0	0	0	0	0	0	0	0	0	0	0	0
AC191107.4_FG001	0	0	0	0	0	0	0	0	0	0	0	0	0	0	0	0	0	0
AC191107.4_FG002	0	0	0	0	0	0	1	0	0	0	0	0	0	0	0	0	0	0
AC191113.2_FG002	134	407	480	280	526	643	45	167	213	141	436	484	291	740	1054	121	363	301
AC191115.3_FG002	0	0	0	0	0	0	0	0	0	0	0	0	0	0	0	0	0	0
AC191147.3_FG002	0	0	0	0	0	0	0	0	0	0	0	0	0	0	0	0	0	0
AC191246.3_FG004	0	0	0	0	0	0	0	1	0	0	0	0	0	0	0	0	0	0
AC191246.3_FG006	16	10	22	7	34	26	4	9	25	16	54	52	7	19	33	12	16	17
AC191251.3_FG005	11	65	89	36	33	63	228	589	860	35	134	139	36	65	77	23	123	98
AC191253.3_FG004	0	0	0	0	0	0	0	0	0	0	0	0	0	0	0	0	0	0
AC191254.3_FG001	14	46	63	20	57	28	8	29	28	1	5	6	0	3	1	2	4	2
AC191264.3_FG002	0	1	0	0	0	1	0	0	1	0	0	0	0	0	0	0	1	0
AC191264.3_FG003	1	3	2	6	1	4	1	0	2	3	7	2	4	4	4	0	1	1
AC191279.2_FG001	0	0	0	0	0	0	0	0	0	0	0	0	1	0	0	0	0	2
AC191279.2_FG003	0	0	0	0	0	0	0	0	0	0	0	0	1	0	6	0	3	5
AC191283.3_FG004	203	760	878	508	962	1227	108	305	349	355	952	1159	485	1243	1880	195	645	549
AC191297.3_FG004	0	0	0	0	2	2	0	0	3	3	1	0	2	3	1	1	2	0
AC191305.3_FG002	0	0	0	0	0	0	0	0	0	0	0	1	2	0	0	1	0	0
AC191317.3_FG009	47	94	102	44	56	61	19	76	65	17	39	70	10	40	38	7	41	29
AC191328.3_FG002	0	0	0	0	0	0	0	0	0	0	0	0	0	0	0	0	0	0
AC191330.3_FG001	5	5	7	1	0	2	0	2	3	1	4	8	0	2	0	0	0	0
AC191338.3_FG002	0	0	0	0	0	0	0	0	0	0	0	0	0	0	0	0	0	0
AC191360.3_FG004	0	0	0	0	0	0	0	0	0	1	22	17	3	4	7	5	22	25
AC191360.3_FG015	0	2	1	0	0	2	0	0	0	0	1	4	0	0	0	1	0	0
AC191361.4_FG006	0	0	0	0	0	0	0	0	0	0	0	0	0	0	0	0	0	0
AC191362.3_FG002	0	5	4	1	0	2	11	23	50	2	0	7	0	1	2	6	23	32
AC191380.3_FG001	0	0	0	0	0	0	0	0	0	0	0	0	0	0	0	0	0	0
AC191401.3_FG009	0	0	0	0	0	0	0	2	1	0	6	1	0	1	0	0	0	0
AC191401.3_FG013	1	1	4	1	0	3	1	0	1	0	0	0	0	2	4	22	46	46
AC191410.4_FG004	0	0	3	0	0	1	1	6	4	1	2	1	0	0	0	0	1	0
AC191412.3_FG005	0	0	0	0	0	0	0	0	0	0	0	0	0	0	2	0	0	0
AC191418.3_FG003	0	0	0	0	11	0	0	0	0	0	0	0	0	0	0	0	0	0
AC191421.3_FG001	0	0	2	0	5	2	0	0	0	60	190	202	34	82	165	23	116	70
AC191523.3_FG001	0	1	0	0	0	0	0	0	1	0	0	0	0	0	0	0	0	0
AC191526.3_FG001	0	0	4	0	0	1	0	0	0	0	3	6	0	3	1	0	4	4
AC191526.3_FG004	0	15	19	0	0	1	2	2	0	2	12	11	0	0	1	0	0	2
AC191534.3_FG003	0	0	0	0	0	0	0	0	0	0	0	0	0	0	0	0	0	0
AC191539.4_FG001	0	6	4	11	5	20	2	5	5	2	6	12	0	3	7	0	2	3
AC191541.4_FG005	0	0	0	0	0	0	0	0	0	0	0	0	0	0	0	0	0	0
AC191548.3_FG005	5	18	25	145	327	377	4	10	8	2	2	4	7	39	38	0	1	0
AC191551.3_FG003	10	25	22	11	6	3	4	6	7	10	26	21	3	21	20	0	19	17
AC191562.3_FG008	0	0	0	0	0	0	0	0	0	0	0	0	0	0	0	0	0	0
AC191564.3_FG003	0	0	0	0	0	0	0	0	0	0	0	0	0	0	0	0	0	0
AC191568.3_FG010	0	0	0	0	0	0	0	0	0	0	0	3	0	0	0	0	2	0
AC191575.2_FG001	448	1356	1974	268	327	638	200	603	757	25	97	77	33	56	143	9	140	147
AC191577.3_FG004	0	0	0	1	0	0	0	0	0	0	0	0	0	0	0	0	0	0
AC191578.3_FG003	0	0	0	0	0	0	0	0	0	0	0	0	0	2	0	0	0	0
AC191589.3_FG003	69	141	229	47	18	88	10	66	86	37	92	104	3	49	72	14	30	43
AC191598.3_FG007	8	11	38	8	1	5	2	11	18	0	7	8	0	0	0	4	3	1
AC191601.1_FG003	0	0	0	0	0	0	0	0	0	21	45	96	12	49	41	3	21	12
AC191622.3_FG003	2	4	0	0	2	2	17	43	48	5	3	5	0	4	5	8	34	31
AC191622.3_FG005	2	0	3	5	3	4	0	3	4	0	2	3	0	2	6	0	3	4
AC191650.3_FG003	0	0	0	12	44	35	1	1	7	0	0	0	0	0	3	0	0	0
AC191654.3_FG004	14	90	109	3	2	13	4	19	17	2	4	6	6	12	18	2	3	5
AC191676.3_FG011	32	91	120	144	271	357	33	91	95	43	98	121	82	264	311	3	31	21
AC191686.3_FG002	12	66	53	54	143	116	29	69	116	7	42	52	16	81	68	4	31	31
AC191691.3_FG011	0	0	0	0	0	0	0	0	0	0	0	0	0	0	0	0	0	0
AC191692.3_FG001	0	0	0	0	0	1	0	0	0	0	0	0	0	0	0	2	2	2
AC191704.3_FG007	0	0	0	0	0	0	2	8	3	0	0	0	0	0	0	1	6	1
AC191708.3_FG001	0	0	0	0	0	0	0	0	0	0	0	0	0	0	0	0	0	0
AC191708.3_FG002	0	0	0	0	0	0	0	0	0	0	0	0	0	0	0	0	0	0
AC191731.3_FG001	0	0	0	0	0	0	0	0	0	0	0	0	0	0	0	0	0	0
AC191735.3_FG009	0	0	0	0	0	0	0	0	0	0	0	0	0	0	0	0	0	0
AC191748.3_FG001	0	0	0	0	0	0	0	0	0	0	0	0	0	0	0	1	0	0
AC191771.3_FG008	117	426	696	289	640	776	111	315	422	180	516	463	187	361	677	44	278	280
AC191778.3_FG001	1	0	3	2	4	11	1	0	3	1	7	10	0	11	8	0	2	2
AC191782.3_FG001	0	0	0	0	0	0	0	0	0	0	0	0	0	0	0	0	0	0
AC191790.3_FG005	0	0	0	0	0	0	0	0	0	0	0	1	0	0	0	0	0	0
AC191804.4_FG002	11	52	55	83	204	280	19	36	56	16	50	51	29	153	159	8	77	63
AC191927.2_FG002	0	0	0	0	0	0	0	0	0	0	0	0	0	0	0	0	0	0
AC191961.3_FG009	32	162	147	20	110	66	25	64	89	174	553	534	31	190	266	36	149	132
AC192175.3_FG001	0	0	0	0	0	0	0	0	0	0	0	0	0	0	0	0	0	0
AC192177.3_FG008	0	0	0	0	0	0	0	0	0	0	0	0	0	0	0	0	0	0
AC192204.3_FG005	26	59	130	24	33	38	8	61	72	25	77	38	18	32	41	17	34	44
AC192240.3_FG005	1	1	1	1	0	3	1	2	1	0	0	0	0	0	0	0	0	0
AC192244.3_FG001	212	936	1039	550	1078	1171	207	635	764	508	1495	1497	354	1145	1562	116	668	524
AC192244.3_FG007	343	1009	1278	335	772	887	164	482	645	569	1376	1600	412	933	1643	161	1219	1019
AC192330.1_FG004	0	0	0	0	0	0	0	0	0	0	0	0	0	0	0	0	0	0
AC192356.3_FG003	10	33	49	13	0	27	30	78	116	0	1	0	0	0	0	0	0	0
AC192362.3_FG002	93	274	313	79	179	209	25	89	130	104	291	310	74	206	286	28	126	138
AC192362.3_FG003	161	500	677	205	387	424	140	255	299	156	570	489	136	266	476	76	234	244
AC192367.2_FG002	35	98	138	93	187	211	36	123	151	96	239	316	35	244	297	29	68	56
AC192368.3_FG009	0	0	2	0	0	0	0	1	1	0	1	0	0	0	0	0	0	0
AC192372.3_FG003	14	48	43	24	72	119	0	7	4	23	42	48	18	67	68	3	8	7
AC192381.3_FG004	0	0	0	0	0	0	4	6	10	0	0	0	0	0	3	46	233	244
AC192405.3_FG001	0	0	0	0	0	0	0	0	0	0	0	0	0	0	2	0	0	0
AC192451.3_FG001	2792	9177	12124	2328	3943	5117	2106	6687	9357	1822	4118	4809	716	1777	2942	494	3722	3247
AC192608.3_FG004	0	2	3	5	13	15	2	0	3	0	0	0	0	2	0	0	0	0
AC193318.3_FG006	0	0	0	0	0	0	0	0	0	0	0	0	0	0	0	0	0	0
AC193319.3_FG004	0	6	1	8	16	14	10	12	33	0	7	1	6	11	18	7	2	6
AC193324.3_FG002	103	357	534	262	488	680	147	502	686	111	206	242	78	246	318	144	244	230
AC193335.3_FG001	0	0	0	0	0	0	0	0	0	0	0	0	0	0	0	0	0	0
AC193353.3_FG002	0	0	0	0	0	2	0	26	11	4	5	32	840	3220	3408	0	20	4
AC193379.3_FG001	168	647	980	192	388	603	123	496	544	190	532	672	156	450	453	223	578	482
AC193402.3_FG004	1	8	6	78	51	214	2	9	19	129	270	391	506	1892	1854	34	91	85
AC193423.3_FG003	2	1	2	0	0	5	1	2	2	0	7	0	5	54	59	0	0	1
AC193430.3_FG008	0	0	0	0	0	0	0	0	0	0	0	0	0	0	0	0	0	0
AC193440.3_FG009	0	1	1	0	3	0	0	0	0	0	0	0	0	0	1	0	0	0
AC193464.3_FG001	0	0	0	0	0	0	0	0	0	0	0	0	0	0	0	0	0	0
AC193466.3_FG001	4	5	13	6	0	15	1	2	3	2	5	3	4	1	4	5	4	3
AC193479.2_FG002	15	50	73	18	47	40	24	87	121	15	40	31	8	11	46	2	56	36
AC193499.3_FG004	3	3	2	8	0	15	4	0	5	0	0	0	0	1	0	0	0	2
AC193499.3_FG007	12	42	42	8	0	20	4	15	18	10	47	27	12	59	30	2	10	17
AC193500.3_FG003	3	30	32	1	10	11	9	18	17	6	12	8	0	7	2	1	4	12
AC193502.3_FG004	0	1	2	0	0	0	0	0	1	0	0	0	0	0	0	0	0	0
AC193503.3_FG004	0	0	0	0	9	0	0	0	0	0	0	0	0	0	0	0	0	0
AC193576.3_FG003	0	0	0	0	0	0	0	0	0	0	0	0	0	0	0	0	0	0
AC193591.3_FG001	8	33	73	50	44	63	3	18	32	2	4	8	2	6	8	0	2	0
AC193592.3_FG001	0	0	0	0	0	0	0	0	0	0	0	0	0	0	0	0	0	0
AC193598.3_FG002	0	7	6	4	6	4	0	0	6	1	8	6	2	4	4	4	24	13
AC193606.2_FG001	0	0	0	0	0	0	0	0	2	0	0	0	0	0	0	0	0	0
AC193606.2_FG005	0	0	0	0	0	0	0	0	0	0	0	0	0	0	0	0	4	0
AC193625.3_FG008	0	0	0	0	0	0	0	0	0	0	0	0	0	0	0	0	0	0
AC193625.3_FG010	0	0	0	0	0	0	0	0	0	0	1	0	0	0	0	2	0	0
AC193630.3_FG003	0	0	0	0	0	0	0	0	0	0	0	0	0	3	0	0	0	0
AC193630.3_FG004	0	3	3	2	4	0	2	6	6	0	1	6	0	5	2	0	6	4
AC193632.2_FG002	211	1027	1146	221	421	496	148	367	472	114	357	371	144	408	612	56	337	304
AC193645.3_FG006	0	0	0	0	4	0	0	5	0	0	5	8	0	0	2	0	2	0
AC193646.3_FG002	0	0	0	0	0	0	0	0	0	0	0	0	0	0	0	0	0	0
AC193658.3_FG001	0	8	11	36	128	147	0	17	22	5	8	6	17	70	62	4	4	10
AC193668.3_FG009	0	7	6	1	0	3	1	1	2	0	2	0	0	0	3	0	0	0
AC193744.3_FG009	0	0	0	0	0	0	0	0	0	0	0	0	0	0	0	0	0	0
AC193745.3_FG002	0	0	0	0	0	0	8	27	24	0	0	0	0	0	2	8	90	75
AC193745.3_FG003	0	0	0	0	0	0	0	0	0	2	2	2	0	0	0	0	2	0
AC193754.3_FG005	0	0	0	0	0	0	0	0	0	0	0	0	0	0	0	0	0	0
AC193754.3_FG008	27	96	106	61	139	161	30	32	89	91	201	199	37	153	203	24	50	50
AC193756.3_FG001	1	2	3	0	2	0	0	0	1	0	0	0	0	0	0	0	0	0
AC193767.3_FG003	0	0	0	0	0	0	0	0	0	0	0	0	0	0	0	0	0	0
AC193786.3_FG005	30	36	86	0	0	0	0	10	12	1	6	2	0	22	14	20	82	75
AC193787.3_FG008	12	51	70	18	36	56	1	16	10	48	113	149	12	93	80	11	44	38
AC194005.3_FG004	12	68	85	24	55	50	9	33	16	65	130	108	15	42	80	12	46	26
AC194008.3_FG007	0	0	0	0	0	0	0	0	0	0	0	0	0	1	0	1	0	0
AC194016.3_FG001	0	0	0	0	0	0	0	0	0	0	0	0	0	0	0	0	0	0
AC194022.3_FG013	1172	3800	4816	1748	2736	3409	279	949	1103	972	3046	3089	765	1566	2870	101	775	635
AC194022.3_FG014	21	54	65	43	38	119	9	49	48	4	11	21	6	19	32	2	6	9
AC194031.3_FG002	2	4	1	4	0	12	2	1	3	0	3	12	1	28	25	0	2	4
AC194032.3_FG010	0	0	0	0	0	1	0	0	1	0	0	1	0	0	0	0	2	0
AC194039.4_FG009	18	44	67	56	83	143	5	43	50	27	89	132	21	51	81	7	87	59
AC194045.3_FG001	1	6	5	15	26	37	2	18	10	5	1	5	4	29	24	0	3	9
AC194047.3_FG006	0	2	0	0	0	0	0	1	0	0	0	0	0	0	0	0	0	0
AC194056.3_FG008	1	8	7	22	37	44	5	10	24	6	5	18	12	63	72	3	46	40
AC194072.3_FG005	35	236	362	74	87	319	15	114	115	0	0	0	0	0	12	1	10	6
AC194097.3_FG008	0	0	0	0	0	0	0	0	0	0	0	0	0	0	0	0	0	0
AC194097.3_FG009	0	0	0	0	0	2	0	0	0	0	0	0	3	0	0	0	0	0
AC194101.3_FG001	0	4	5	9	3	7	2	1	4	1	5	2	0	6	2	0	0	1
AC194103.3_FG006	9	46	30	16	33	35	4	5	19	22	74	48	20	52	59	0	12	13
AC194104.3_FG007	0	0	0	0	1	0	0	0	4	0	0	0	0	2	0	0	2	0
AC194104.3_FG010	0	0	0	0	0	0	0	0	0	0	0	0	0	0	0	0	0	1
AC194112.3_FG001	118	480	526	319	133	896	105	283	367	181	552	575	177	824	767	34	278	225
AC194133.3_FG004	12	28	64	42	4	44	6	14	16	7	18	35	3	33	24	1	14	7
AC194136.3_FG001	1	4	4	3	4	3	1	0	3	0	0	0	0	0	0	0	0	0
AC194157.3_FG001	0	0	0	0	0	0	0	1	0	2	7	4	10	26	30	0	2	0
AC194158.3_FG005	0	6	9	208	427	519	99	280	348	5	34	60	260	772	1015	3	20	9
AC194163.3_FG001	0	0	0	0	0	0	0	0	0	0	0	0	0	0	0	0	0	0
AC194163.3_FG002	0	3	0	3	9	13	0	0	2	0	0	0	0	0	0	0	0	0
AC194163.3_FG003	1	3	6	9	21	26	4	6	5	0	0	0	0	12	8	2	1	0
AC194172.3_FG008	0	0	0	0	0	0	0	0	0	0	0	0	0	0	0	0	1	0
AC194174.3_FG003	0	14	9	5	4	18	3	10	12	2	3	5	2	4	1	0	0	0
AC194176.3_FG002	2	2	14	13	9	11	1	3	6	6	15	15	4	13	18	1	8	1
AC194180.3_FG004	0	0	0	0	0	0	0	0	0	0	0	0	0	0	0	0	0	0
AC194203.3_FG003	0	0	5	0	3	0	0	0	2	2	0	2	0	1	3	0	0	0
AC194206.3_FG005	0	1	2	2	8	12	2	15	22	2	0	9	4	2	4	8	10	3
AC194214.3_FG002	1	2	3	2	5	11	1	2	3	4	9	4	2	7	7	0	2	0
AC194219.3_FG002	0	0	0	0	0	0	0	0	0	0	0	0	0	0	0	0	0	0
AC194259.3_FG001	10	18	72	24	26	74	11	40	49	3	4	13	3	9	7	0	1	4
AC194264.3_FG006	107	370	508	297	516	740	151	429	505	143	486	536	117	381	535	67	306	257
AC194272.3_FG003	65	206	230	667	1224	1747	21	98	142	36	98	130	317	886	1230	7	51	57
AC194273.3_FG006	0	0	0	0	0	0	0	0	0	0	0	0	0	0	0	0	0	0
AC194273.3_FG007	0	0	0	0	0	0	0	0	0	0	0	0	0	0	0	0	0	0
AC194298.3_FG005	1	52	26	62	115	158	7	9	8	22	46	102	17	73	109	4	30	29
AC194321.3_FG009	4	18	20	9	17	9	3	10	20	16	17	33	6	21	28	0	21	8
AC194325.3_FG006	2	0	6	1	3	0	0	0	0	0	0	5	0	2	2	0	1	1
AC194335.3_FG001	0	0	0	0	0	5	0	0	0	0	0	0	0	0	4	0	0	0
AC194338.3_FG008	12	29	30	4	12	2	171	713	441	2	4	0	0	1	6	19	69	49
AC194341.4_FG001	0	0	0	0	0	0	0	0	0	0	0	0	0	0	0	0	0	0
AC194341.4_FG002	475	1400	1925	914	1730	2123	209	741	961	790	1864	2363	820	1405	2773	112	826	643
AC194341.4_FG003	0	0	2	0	0	0	0	0	2	0	0	0	0	2	2	0	0	0
AC194341.4_FG004	36	119	119	54	68	94	78	199	255	78	234	183	25	130	107	42	188	142
AC194350.3_FG001	0	7	8	5	14	8	2	4	3	2	6	13	2	8	5	2	1	0
AC194355.3_FG002	40	178	185	79	145	211	53	101	153	92	144	137	33	118	189	35	74	69
AC194356.3_FG002	0	0	0	0	0	0	0	0	0	3	11	18	6	6	14	2	8	7
AC194357.3_FG003	1	1	4	1	0	2	0	0	0	0	0	0	0	0	0	0	0	0
AC194362.3_FG003	1	3	2	7	7	16	0	2	3	15	12	25	36	50	81	2	9	4
AC194380.3_FG008	0	2	2	2	0	1	0	0	0	1	0	0	1	1	0	5	21	24
AC194389.3_FG001	509	1818	2152	840	1242	2119	295	876	1170	481	1237	1539	311	1058	1422	179	1018	918
AC194402.2_FG003	2	14	11	0	3	4	1	4	7	0	1	0	0	0	1	0	0	0
AC194402.2_FG004	3	15	28	29	46	70	5	17	20	18	72	46	18	68	75	1	5	6
AC194405.3_FG009	0	0	0	0	0	0	0	0	0	0	0	0	0	0	0	0	0	0
AC194405.3_FG021	33	78	96	112	27	279	10	35	41	8	70	43	26	72	72	16	51	44
AC194410.3_FG002	12	52	68	28	48	86	13	35	29	3	9	16	3	16	30	0	3	4
AC194425.3_FG005	53	133	142	53	104	127	39	129	153	165	197	397	110	154	338	35	261	264
AC194428.3_FG006	3	14	10	7	4	11	0	4	7	0	8	6	3	1	5	0	8	9
AC194428.3_FG007	0	0	1	4	4	13	2	1	0	0	0	0	0	3	2	0	3	0
AC194438.3_FG005	0	1	0	4	9	8	0	0	1	0	0	0	1	3	3	0	0	0
AC194439.3_FG002	0	0	0	0	0	0	0	0	0	0	0	0	0	1	0	0	0	0
AC194452.3_FG001	0	0	0	0	0	0	0	0	0	0	0	0	0	0	0	0	0	0
AC194457.3_FG001	2	12	14	2	0	2	2	10	4	6	0	6	0	0	8	0	0	8
AC194467.3_FG006	77	370	495	152	264	377	98	240	348	0	1	0	0	0	1	0	0	0
AC194472.3_FG001	8	22	25	3	13	9	9	17	18	1	14	9	2	5	9	1	13	7
AC194478.3_FG005	0	0	12	8	0	20	1	4	4	0	0	0	0	0	0	8	48	40
AC194480.3_FG001	0	0	0	0	2	0	0	0	0	0	0	0	0	0	1	0	0	0
AC194480.3_FG003	0	0	0	0	1	0	0	1	0	0	2	1	0	0	3	0	0	0
AC194481.3_FG002	0	0	0	0	0	0	0	0	0	0	0	0	0	0	0	0	0	0
AC194485.3_FG002	0	0	0	0	0	0	0	0	0	7	63	36	9	51	82	3	8	7
AC194591.2_FG004	0	0	1	1	0	1	0	0	0	0	0	0	0	0	0	0	0	0
AC194591.2_FG005	2	9	7	6	5	9	0	2	4	10	14	21	0	12	8	0	0	3
AC194592.2_FG001	0	0	0	0	2	0	0	0	0	0	0	0	0	2	0	0	0	0
AC194597.2_FG001	0	2	0	6	16	5	1	2	1	0	0	0	1	2	2	0	1	0
AC194609.2_FG003	10	42	62	29	48	77	121	302	354	15	31	57	11	17	37	73	263	169
AC194613.2_FG002	1	1	4	11	13	20	5	8	4	3	2	4	3	27	9	1	8	4
AC194633.3_FG014	0	0	0	0	0	0	0	0	0	0	0	0	0	0	0	0	0	0
AC194666.2_FG010	91	360	436	211	106	469	48	128	236	9	36	54	4	23	28	9	15	17
AC194670.2_FG001	0	0	0	0	0	0	0	0	0	0	0	0	0	2	0	0	0	1
AC194705.3_FG004	0	0	3	0	0	0	0	0	0	0	0	0	0	0	0	0	0	0
AC194712.3_FG002	0	0	4	0	0	0	0	0	0	0	0	0	0	0	0	0	0	0
AC194719.3_FG002	0	0	0	0	0	0	14	18	41	0	0	0	0	0	0	0	0	0
AC194734.3_FG004	564	1646	1661	426	1005	862	223	915	673	82	79	126	55	67	79	6	34	36
AC194824.2_FG003	0	0	0	0	0	0	0	0	0	0	0	0	0	0	1	0	0	0
AC194824.2_FG005	4	14	26	71	120	129	9	24	23	1	14	20	41	64	96	9	27	19
AC194828.3_FG004	0	0	3	0	0	0	0	2	1	0	0	0	0	0	2	0	0	0
AC194828.3_FG012	0	0	0	0	0	0	0	0	0	0	0	0	0	0	0	0	0	0
AC194839.3_FG001	0	0	0	0	0	0	0	0	0	0	0	0	0	0	0	2	2	1
AC194852.3_FG007	1	23	18	2	6	6	27	45	67	13	31	14	3	17	30	17	80	76
AC194853.1_FG002	0	0	1	0	0	0	0	0	0	0	0	0	0	0	0	0	0	0
AC194856.3_FG002	23	46	60	16	25	53	24	96	96	36	76	95	19	65	83	27	140	169
AC194856.3_FG007	35	65	104	29	57	102	36	154	164	65	137	156	32	89	120	36	211	238
AC194863.3_FG004	0	0	0	0	0	0	0	0	0	0	0	0	0	0	0	0	0	0
AC194863.3_FG006	0	0	2	0	0	2	0	0	2	0	0	0	0	0	0	0	0	0
AC194863.3_FG007	0	0	0	0	0	0	0	0	0	5	16	24	2	15	10	4	8	6
AC194878.3_FG001	4	8	4	3	7	11	1	12	12	213	662	603	224	594	790	94	530	442
AC194878.3_FG002	4	42	35	18	28	39	7	15	24	209	701	597	203	602	681	84	509	472
AC194895.3_FG004	0	0	0	0	0	0	0	0	0	0	0	0	0	0	0	0	0	0
AC194897.4_FG003	0	0	0	0	2	4	0	0	0	0	0	0	2	0	2	0	0	1
AC194897.4_FG005	0	3	0	20	37	39	0	0	0	0	7	1	15	45	62	0	0	0
AC194898.3_FG003	2	6	19	12	265	62	4	16	18	8	22	57	20	51	56	24	17	15
AC194905.2_FG001	0	0	0	0	0	0	0	13	7	0	0	0	0	0	0	0	0	2
AC194905.2_FG003	0	0	0	0	0	0	0	0	0	0	0	0	0	0	0	0	0	0
AC194912.3_FG003	0	0	0	0	0	0	0	0	0	0	0	0	0	0	0	0	0	0
AC194914.3_FG002	179	694	705	161	340	392	101	264	356	212	535	591	88	328	434	23	141	110
AC194937.3_FG004	14	26	27	15	9	43	0	0	2	73	193	200	103	216	301	15	82	53
AC194940.3_FG001	0	0	0	0	0	0	0	0	0	0	0	0	0	0	0	0	0	0
AC194942.3_FG001	0	0	0	0	0	0	0	0	0	0	0	0	0	0	0	0	7	0
AC194965.4_FG001	197	556	797	92	174	282	50	219	232	221	762	809	50	191	182	58	237	205
AC194965.4_FG004	282	793	1203	249	524	664	95	241	455	267	535	652	114	348	483	88	442	443
AC194970.5_FG001	1427	4948	5687	2110	4474	5481	1094	3714	4480	1299	3006	4150	1110	4384	4845	457	3303	2903
AC194970.5_FG002	56	244	204	117	218	320	55	140	179	172	417	547	130	407	557	16	175	164
AC194970.5_FG004	306	904	1168	535	1065	1491	335	942	1196	678	2013	2459	466	1844	2351	335	1260	1164
AC194970.5_FG005	577	1934	2348	1907	3366	3995	415	1276	1615	1103	2982	3368	1563	4133	5732	251	1519	1274
AC194970.5_FG009	50	180	188	215	507	618	117	394	583	389	1183	1184	362	1096	1577	127	892	772
AC194972.2_FG001	0	0	0	0	0	0	0	0	0	0	0	0	0	0	0	0	0	0
AC194974.3_FG001	0	0	0	0	0	0	0	0	0	0	0	0	0	0	0	0	0	0
AC194974.3_FG005	179	584	713	347	806	897	30	187	190	685	1707	1911	370	1324	1603	104	414	415
AC194977.2_FG004	0	4	8	1	0	4	0	4	0	2	7	2	0	8	12	0	4	2
AC194980.3_FG002	0	0	0	0	0	0	0	0	0	0	0	0	0	0	0	0	0	0
AC194980.3_FG005	0	1	2	0	1	1	8	20	16	0	0	0	0	0	0	5	34	28
AC195058.3_FG003	0	0	0	0	0	0	0	0	0	0	0	0	0	0	0	0	0	0
AC195135.3_FG002	0	0	0	0	0	0	0	0	0	0	0	0	0	0	0	0	0	0
AC195138.3_FG004	2	5	3	2	1	2	0	0	1	0	2	5	3	28	30	0	2	0
AC195147.3_FG001	0	0	2	0	0	0	0	0	0	0	0	1	0	0	0	0	0	0
AC195147.3_FG008	0	2	4	3	7	5	0	2	5	0	2	2	1	4	7	0	7	6
AC195148.3_FG001	0	0	0	0	0	0	0	0	0	0	0	0	0	0	0	0	0	0
AC195154.3_FG004	1589	5482	6787	1967	4190	5616	698	2551	3305	1492	4241	5236	725	3907	3998	810	1146	1142
AC195168.2_FG004	1	0	0	0	0	0	0	0	0	0	0	0	0	0	1	0	0	0
AC195172.3_FG001	45	76	94	14	147	56	12	24	49	374	1027	1192	153	677	686	140	438	422
AC195174.2_FG007	92	143	279	44	69	94	30	53	76	13	12	13	12	7	8	11	8	13
AC195207.2_FG002	0	0	1	0	0	1	0	0	0	0	0	0	0	0	0	0	0	0
AC195214.3_FG007	0	0	0	0	0	0	0	0	0	0	0	0	0	0	0	0	0	0
AC195220.3_FG003	0	0	0	0	0	0	0	0	0	0	2	0	0	0	0	0	0	0
AC195220.3_FG004	0	0	0	0	0	0	0	0	0	0	0	0	0	0	0	0	0	0
AC195220.3_FG007	0	0	0	0	0	0	0	0	0	0	0	0	0	0	0	0	0	0
AC195230.2_FG003	5	18	8	1	11	2	2	19	15	0	0	0	0	0	1	0	0	0
AC195235.3_FG003	5	21	18	11	0	13	31	59	78	6	24	25	4	18	13	12	36	29
AC195240.4_FG002	0	0	0	0	0	0	0	0	1	0	0	0	0	0	0	0	0	0
AC195244.3_FG008	0	0	0	0	0	0	0	0	0	0	0	0	0	0	0	0	1	0
AC195253.3_FG002	0	0	6	0	0	4	0	0	0	0	0	0	0	0	0	0	0	0
AC195260.2_FG007	0	0	1	0	0	2	1	0	0	0	0	6	0	1	2	1	2	0
AC195307.3_FG001	44	133	191	53	184	138	391	1334	1692	0	0	0	0	2	4	0	0	0
AC195320.3_FG003	4	25	28	22	26	36	12	27	15	11	36	20	4	23	30	7	16	15
AC195331.3_FG008	88	289	339	137	422	398	29	85	89	228	633	765	88	438	524	4	52	48
AC195340.3_FG001	8586	27745	35253	12172	23847	29114	6241	17258	22403	18372	49548	55074	10665	34120	44380	2838	18698	16154
AC195340.3_FG002	1173	3962	5241	2312	4561	4708	907	2829	3922	1870	4531	5235	1559	3337	5717	551	3747	3220
AC195340.3_FG004	520	1702	2225	791	1672	2151	353	928	1438	1186	2692	3395	620	2094	2670	413	1391	1293
AC195340.3_FG005	7	28	23	1	4	7	1	7	14	1	1	0	0	0	0	0	3	2
AC195342.3_FG002	0	0	0	0	0	0	0	0	0	0	0	0	0	0	0	0	0	0
AC195343.3_FG002	20	63	70	97	177	221	87	342	298	3	11	5	1	10	24	37	215	170
AC195347.4_FG004	459	1660	2056	224	674	689	987	2604	3362	558	1432	1725	209	700	834	656	2634	2441
AC195348.3_FG004	0	0	0	0	0	0	0	0	1	0	0	0	0	0	0	0	0	1
AC195351.3_FG001	0	1	0	0	5	4	0	2	5	4	3	8	76	319	330	0	4	0
AC195351.3_FG003	0	1	3	23	82	73	2	9	7	0	4	6	27	112	100	0	0	4
AC195367.3_FG001	0	0	1	2	6	6	1	4	2	0	0	1	0	2	2	0	1	0
AC195370.3_FG004	0	0	0	5	22	25	0	0	0	1	0	0	0	10	10	0	0	0
AC195378.3_FG001	0	0	0	0	0	0	0	0	0	0	0	0	0	0	0	0	0	0
AC195389.3_FG001	11	17	41	20	35	33	7	18	28	5	5	12	1	9	22	1	4	10
AC195402.3_FG001	0	0	0	0	0	0	0	0	0	0	0	0	0	1	0	0	0	0
AC195458.3_FG001	0	0	0	0	0	0	0	0	0	0	0	0	0	0	0	0	0	0
AC195484.3_FG003	6	18	71	27	26	47	17	53	73	14	34	60	19	18	12	4	71	56
AC195485.3_FG002	12	16	41	36	59	99	5	6	11	0	0	7	3	5	1	3	2	4
AC195536.3_FG006	0	0	0	0	0	0	0	0	0	0	0	0	0	0	0	0	0	0
AC195545.3_FG003	0	0	0	0	0	0	0	0	1	0	0	1	1	1	1	0	0	0
AC195580.2_FG010	0	1	1	0	3	0	0	0	0	0	0	0	0	0	0	0	0	0
AC195587.4_FG003	1	5	4	9	25	9	2	12	9	0	8	3	1	5	10	20	20	10
AC195587.4_FG004	417	1475	1691	594	889	1125	267	806	1045	386	767	972	172	510	903	225	834	745
AC195596.3_FG002	10	10	17	266	548	797	2	8	12	184	628	652	149	569	559	215	688	673
AC195596.3_FG005	12	14	22	308	558	837	0	11	16	211	865	892	162	752	711	250	873	833
AC195608.3_FG005	9	21	16	193	389	451	9	41	45	4	19	18	100	370	391	3	7	7
AC195608.3_FG006	5	7	5	104	223	265	9	30	29	4	8	7	60	197	255	2	7	6
AC195685.3_FG001	0	1	0	1	0	2	3	2	0	1	0	0	3	3	4	0	4	0
AC195785.3_FG004	158	519	650	299	609	801	104	311	409	60	167	185	66	234	250	33	90	91
AC195794.3_FG002	8	8	16	1	8	14	9	22	51	0	0	1	0	0	0	0	0	0
AC195796.3_FG001	0	1	1	3	0	0	0	1	3	1	4	0	3	0	1	0	2	0
AC195798.3_FG001	0	0	0	0	0	0	0	0	0	0	0	0	0	0	0	0	0	0
AC195806.3_FG001	230	738	991	360	561	844	130	359	562	51	157	175	52	169	167	14	88	74
AC195807.3_FG004	7	65	58	30	32	69	12	25	21	20	18	69	15	66	52	15	25	29
AC195825.3_FG001	0	3	3	1	4	5	1	0	0	0	0	0	0	0	0	0	0	0
AC195826.2_FG006	0	0	1	0	0	0	0	0	0	0	0	0	0	0	2	0	0	0
AC195860.3_FG002	33	103	114	121	153	305	15	42	63	21	65	65	42	149	133	18	23	31
AC195860.3_FG005	35	105	117	37	31	82	12	57	55	15	93	61	11	46	92	10	52	37
AC195860.3_FG006	59	148	220	169	360	411	48	91	135	209	497	599	89	399	414	10	48	29
AC195864.3_FG017	2	6	8	24	56	37	4	4	4	7	11	12	10	46	43	0	4	3
AC195864.3_FG020	0	0	0	0	0	0	0	0	0	0	0	0	0	0	0	0	0	0
AC195874.2_FG002	479	1585	2025	764	1232	1489	359	1127	1438	1141	2638	2865	901	1352	3345	250	1623	1577
AC195914.2_FG002	23	62	56	64	149	203	8	21	32	4	16	20	36	151	181	0	2	1
AC195914.2_FG003	2	10	7	62	116	178	15	43	35	8	26	99	72	371	310	3	21	33
AC195920.3_FG006	0	0	0	0	0	0	0	0	0	0	0	0	0	0	0	0	0	0
AC195946.3_FG003	0	0	0	0	0	0	0	0	0	0	0	0	0	0	0	0	0	0
AC195954.3_FG001	0	0	0	0	0	2	0	0	1	35	112	110	8	31	38	71	141	194
AC195957.3_FG003	3	10	6	4	7	8	4	4	8	2	12	25	1	9	12	0	4	1
AC195959.2_FG004	0	4	3	2	4	3	0	4	3	0	0	0	0	0	0	0	1	3
AC195980.2_FG004	4	35	52	18	0	28	4	14	30	0	77	62	8	65	37	16	7	24
AC195989.3_FG004	0	0	0	0	0	0	0	0	0	0	0	1	0	0	0	0	0	0
AC195995.3_FG006	0	0	0	0	0	0	0	0	0	0	0	0	1	0	2	0	0	0
AC195995.3_FG008	0	3	8	1	24	8	4	6	3	0	0	0	3	18	12	0	0	0
AC195999.3_FG005	14	66	58	104	130	218	22	61	82	18	39	52	46	158	164	3	29	25
AC196002.2_FG002	4	35	23	2	7	17	6	24	25	0	0	0	0	0	1	0	0	0
AC196008.1_FG001	1	5	2	1	13	0	2	0	7	0	0	2	0	0	1	0	0	0
AC196008.1_FG004	7	46	55	40	271	83	4	4	23	5	36	17	11	30	50	0	14	6
AC196009.2_FG008	0	0	0	0	0	0	0	0	0	0	0	0	0	1	0	0	0	0
AC196018.3_FG003	0	0	0	0	0	0	0	0	0	0	0	0	0	0	0	0	0	0
AC196019.3_FG001	0	0	0	0	0	0	0	0	0	0	0	0	0	0	0	0	0	0
AC196025.3_FG001	0	1	4	0	5	2	2	6	2	1	1	3	1	2	5	3	3	2
AC196025.3_FG002	0	0	0	0	0	0	1	0	0	0	0	0	0	0	0	0	0	0
AC196025.3_FG008	0	0	0	0	0	0	0	0	0	0	0	0	0	0	0	0	0	0
AC196025.3_FG009	0	0	0	0	0	0	0	0	1	0	5	0	0	0	0	0	0	0
AC196025.3_FG010	0	2	4	0	0	0	0	0	6	0	0	2	0	0	0	0	0	0
AC196025.3_FG011	0	4	7	1	4	3	1	6	17	0	0	4	0	7	4	3	2	0
AC196025.3_FG012	0	1	2	0	0	0	0	0	3	0	0	1	0	0	0	0	0	0
AC196025.3_FG013	0	3	6	0	0	0	0	1	11	0	1	3	0	0	0	0	0	0
AC196025.3_FG015	86	335	409	53	122	143	75	201	281	73	130	158	18	41	73	32	99	94
AC196035.3_FG002	0	0	0	0	0	0	0	0	0	0	0	0	0	0	0	0	0	0
AC196043.3_FG005	9	59	51	165	375	511	9	21	35	16	67	54	50	243	225	4	19	14
AC196048.2_FG001	0	0	0	0	0	0	0	0	0	0	0	0	0	0	0	0	0	0
AC196059.3_FG003	1106	3151	3991	1545	3712	4097	511	2138	2454	999	2527	2845	819	3013	3565	327	2283	1949
AC196065.3_FG001	0	0	0	0	0	0	0	0	0	0	0	0	0	0	0	0	0	0
AC196066.3_FG003	252	879	1070	290	642	820	124	397	538	226	452	653	86	381	483	139	491	413
AC196082.3_FG001	0	0	0	0	0	2	0	0	0	0	0	0	0	4	2	0	0	0
AC196090.3_FG006	67	268	262	66	180	192	98	344	447	304	959	1029	92	587	511	179	1012	972
AC196096.3_FG005	0	0	0	0	0	0	0	0	0	0	0	0	0	0	0	0	0	0
AC196105.3_FG002	1	1	1	2	0	7	2	0	0	0	2	0	4	4	10	0	2	2
AC196106.2_FG001	0	0	4	2	5	1	0	0	1	0	2	0	0	0	1	1	0	0
AC196110.4_FG004	2	0	2	0	0	0	1	3	1	69	58	100	29	66	111	47	276	200
AC196123.3_FG001	0	0	0	0	0	0	0	1	0	0	0	0	0	0	0	0	0	0
AC196130.3_FG002	1	1	0	1	2	0	0	2	1	0	2	0	0	3	1	0	1	0
AC196135.3_FG006	1	4	2	0	11	4	2	6	4	2	4	5	8	18	14	2	12	12
AC196143.2_FG003	0	0	0	0	0	0	0	0	0	0	0	0	0	0	0	0	0	0
AC196154.3_FG014	34	88	132	2	2	20	6	18	12	3	5	5	8	22	33	2	3	6
AC196154.3_FG018	0	1	1	3	0	1	0	3	0	1	6	2	0	2	0	0	1	1
AC196156.3_FG003	239	602	865	395	1054	707	191	573	843	476	1090	1193	361	779	1280	113	835	681
AC196158.3_FG002	14	45	110	572	1080	1414	668	1825	2312	5	50	32	164	864	774	327	827	758
AC196161.3_FG002	0	0	0	0	0	0	0	0	2	0	0	2	0	0	0	0	0	0
AC196161.3_FG004	0	0	0	0	0	0	0	0	0	0	0	0	0	0	0	0	0	0
AC196170.2_FG003	0	0	0	0	0	0	0	0	1	0	0	1	0	4	0	0	0	0
AC196171.6_FG002	5	13	13	41	49	68	11	22	50	5	5	3	15	38	33	2	20	15
AC196202.3_FG007	0	0	1	1	0	2	6	1	11	21	87	84	7	7	18	0	0	4
AC196206.3_FG007	0	0	0	0	0	0	0	0	0	1	0	2	0	2	2	0	0	0
AC196212.3_FG001	0	0	1	0	1	0	0	0	1	0	1	0	0	1	0	0	0	0
AC196213.3_FG001	0	0	0	0	0	0	0	0	0	0	0	0	0	0	0	0	0	0
AC196259.2_FG010	23	68	73	47	136	111	26	49	69	15	75	72	14	117	90	31	51	51
AC196262.4_FG006	0	0	0	0	0	0	0	0	1	0	0	0	0	0	0	3	9	3
AC196278.2_FG003	2	17	42	15	29	68	5	7	22	60	190	203	33	145	169	10	10	15
AC196278.2_FG004	5	24	38	43	51	73	7	15	19	65	270	336	33	168	240	12	15	17
AC196278.2_FG005	2	6	10	1	2	2	5	3	5	1	14	23	1	6	20	2	9	2
AC196290.3_FG007	6	12	10	8	21	20	2	8	8	10	22	29	10	35	42	2	7	8
AC196394.3_FG002	0	11	22	5	41	21	6	17	28	0	0	0	0	0	0	0	3	0
AC196395.3_FG001	0	0	0	0	4	7	0	0	3	0	0	2	0	2	3	1	1	0
AC196412.3_FG001	0	0	0	0	0	0	0	0	0	0	0	0	0	0	0	0	0	0
AC196417.3_FG008	0	0	0	0	0	0	0	0	0	0	0	0	0	0	0	0	0	0
AC196420.4_FG002	0	0	0	0	0	0	0	0	0	0	0	0	0	0	0	0	0	0
AC196426.3_FG007	1616	6196	8240	3530	7670	9378	1478	4774	6017	2646	7026	8228	2413	7430	10687	1253	5250	4881
AC196431.2_FG001	0	0	1	0	3	4	0	3	3	0	0	1	0	2	6	0	1	3
AC196432.3_FG007	0	0	0	0	0	0	0	0	0	0	0	0	0	0	1	1	3	8
AC196436.3_FG002	0	0	0	0	0	0	0	0	0	0	0	0	0	0	0	0	0	0
AC196437.3_FG001	1	1	0	0	3	0	0	0	0	0	0	0	0	0	0	0	0	0
AC196439.3_FG002	0	1	1	0	0	2	0	0	0	0	0	1	0	0	0	0	3	0
AC196465.3_FG002	11	39	29	14	48	46	4	22	32	43	85	83	24	60	67	15	22	37
AC196465.3_FG006	236	865	1010	372	775	1268	144	429	518	334	797	864	209	740	841	164	306	318
AC196470.3_FG007	17	27	23	38	98	86	8	9	12	14	32	53	21	86	105	3	25	22
AC196475.3_FG004	5092	17925	20166	7014	15741	18202	2728	8158	9205	11474	23546	32490	5971	24220	26902	2524	16701	14147
AC196475.3_FG005	924	3346	4101	4371	8194	10556	1011	2998	4127	1216	3720	4156	3813	13016	16904	725	2853	2688
AC196488.3_FG007	2	1	2	44	92	91	2	5	4	5	2	2	16	39	67	0	0	2
AC196489.3_FG002	483	1417	2000	1071	2126	2585	420	1222	1657	1368	3621	4164	1037	2580	4053	190	1382	1151
AC196502.3_FG003	3	9	3	5	5	17	1	8	5	1	7	2	1	7	4	0	0	0
AC196575.3_FG007	0	4	4	2	0	4	1	2	0	2	3	8	1	10	11	0	2	2
AC196637.2_FG002	0	2	7	17	66	105	4	26	15	17	28	36	20	90	108	5	18	20
AC196642.4_FG003	0	0	3	0	0	0	0	1	0	0	0	0	0	0	0	0	2	2
AC196708.3_FG006	11	18	45	30	41	61	3	16	20	6	35	38	13	47	29	4	22	21
AC196709.3_FG001	0	0	0	0	0	0	0	0	0	0	2	0	0	0	0	0	0	0
AC196710.3_FG013	0	0	0	0	0	0	0	1	1	0	0	0	0	0	0	1	0	0
AC196714.3_FG004	0	0	0	0	0	0	0	0	0	0	0	0	0	0	0	0	0	0
AC196719.3_FG002	0	0	0	0	0	0	0	4	1	81	271	272	80	344	339	44	245	154
AC196726.2_FG001	0	1	7	4	9	17	49	183	212	2	2	6	30	85	118	0	29	18
AC196728.3_FG003	0	0	0	0	0	0	0	0	0	0	0	0	0	0	0	0	0	0
AC196779.3_FG003	37	211	203	42	117	201	49	212	244	21	66	84	17	53	84	9	53	53
AC196780.4_FG003	1	11	29	1	2	3	0	1	4	1	6	3	0	2	3	0	1	2
AC196789.3_FG001	0	0	0	0	0	0	0	0	0	0	0	0	0	0	0	0	0	0
AC196795.4_FG009	27	89	113	42	84	79	11	46	99	24	67	99	19	47	71	18	79	70
AC196954.2_FG012	252	726	741	180	619	503	74	250	327	3	11	6	0	6	9	16	111	103
AC196956.3_FG003	66	155	248	150	246	231	32	115	155	31	164	135	64	198	85	28	186	112
AC196957.3_FG005	22	54	72	24	22	36	12	19	24	4	16	31	1	7	24	5	7	2
AC196961.2_FG003	1	11	22	28	67	54	17	27	76	259	691	665	45	136	130	4	5	22
AC196961.2_FG004	0	2	5	1	5	1	0	1	3	0	0	0	0	0	0	0	0	0
AC196972.3_FG009	0	1	0	0	1	0	0	0	0	0	0	0	0	0	0	0	0	0
AC196974.3_FG008	8	36	36	12	23	20	0	27	13	0	0	2	0	0	4	0	0	0
AC196978.5_FG002	12	31	55	76	126	157	4	17	20	7	44	35	24	72	98	2	10	16
AC196978.5_FG007	0	1	2	0	0	0	0	2	8	0	1	0	0	0	0	0	0	0
AC196984.3_FG001	0	0	0	2	1	2	0	2	0	0	0	0	10	65	64	0	0	5
AC197013.3_FG003	164	606	619	393	695	854	58	194	277	164	473	584	181	864	1035	118	301	263
AC197021.3_FG004	0	0	0	0	0	0	0	0	0	0	0	0	0	0	0	0	0	1
AC197029.3_FG001	0	0	0	0	0	0	0	0	0	0	0	0	0	0	0	0	0	0
AC197029.3_FG003	0	8	22	7	8	11	1	4	29	31	89	145	7	72	85	4	29	32
AC197038.3_FG001	31	94	122	46	97	111	18	40	74	5	14	13	12	18	27	3	13	16
AC197041.3_FG001	0	0	2	2	1	0	0	0	0	0	0	0	0	0	0	0	0	0
AC197047.3_FG001	87	289	248	52	100	100	49	115	144	96	148	198	5	16	19	22	154	131
AC197054.3_FG002	0	0	0	0	0	0	0	0	0	0	0	0	0	2	0	0	0	0
AC197055.3_FG003	0	0	0	0	0	0	0	0	0	0	0	0	0	0	0	0	0	0
AC197056.3_FG002	13	29	33	19	60	32	7	13	7	7	22	29	5	12	12	3	17	13
AC197056.3_FG005	90	250	378	76	187	188	109	284	456	228	593	652	108	257	424	90	341	277
AC197082.3_FG004	0	0	0	0	0	0	0	0	0	0	0	0	0	0	0	0	2	0
AC197082.3_FG005	0	0	0	0	0	0	0	0	0	0	0	0	0	0	0	0	2	0
AC197109.3_FG004	0	0	1	0	0	0	0	0	0	0	0	4	0	0	2	0	0	0
AC197118.3_FG005	307	1218	1394	542	1065	1320	277	709	932	485	1288	1379	285	921	1106	131	753	649
AC197122.3_FG003	239	1221	1522	1057	1932	2533	188	655	855	488	1205	1419	541	1486	2263	226	695	641
AC197124.3_FG002	0	0	0	0	0	0	0	0	0	0	0	0	0	0	0	0	0	0
AC197124.3_FG004	0	0	0	0	0	0	0	0	0	0	0	0	0	0	0	0	0	0
AC197140.2_FG001	5	11	9	6	15	16	3	5	10	3	10	19	7	13	24	0	9	6
AC197143.3_FG007	4	14	24	34	45	72	5	18	22	9	20	16	12	40	38	1	8	6
AC197143.3_FG010	0	0	0	0	0	0	0	0	1	0	0	0	0	1	1	0	1	0
AC197145.4_FG001	0	0	0	0	0	0	0	0	0	0	0	0	0	0	0	0	0	0
AC197146.3_FG001	0	0	0	41	71	73	15	27	64	99	281	291	60	274	341	0	2	7
AC197146.3_FG002	117	282	354	106	233	265	241	739	886	463	984	1070	154	388	592	236	1285	1133
AC197150.3_FG003	2195	6438	8871	3509	6436	9029	976	3187	4034	1820	5220	6338	2126	7098	9712	894	3587	3268
AC197164.4_FG002	843	2512	3137	587	1069	1474	701	2075	2923	0	0	0	0	5	2	0	0	0
AC197230.3_FG001	22	45	49	11	34	30	4	2	41	0	0	0	0	1	0	0	0	0
AC197242.3_FG001	0	0	1	0	0	0	0	0	1	0	3	0	0	0	0	0	0	0
AC197246.3_FG001	103	309	400	475	992	1283	115	334	536	454	1168	1111	447	1130	1507	49	352	330
AC197246.3_FG003	141	371	481	437	720	1031	94	214	337	389	1211	1321	320	796	1242	34	173	189
AC197265.3_FG005	0	0	2	0	0	0	0	0	0	4	14	16	0	2	1	20	88	78
AC197267.3_FG001	0	4	2	22	46	32	2	0	3	0	1	3	2	20	20	0	0	2
AC197274.4_FG010	12	32	54	25	39	62	8	40	35	50	144	165	22	50	45	5	17	10
AC197340.3_FG003	2	2	1	1	4	2	0	2	3	3	2	4	1	0	1	0	0	6
AC197340.3_FG004	0	0	0	0	0	0	0	0	0	0	0	0	0	0	0	0	0	0
AC197347.3_FG003	0	0	0	0	0	0	0	0	0	0	0	0	0	0	0	0	0	0
AC197355.3_FG001	1	9	10	6	3	13	0	0	2	2	12	6	0	1	1	0	1	0
AC197373.4_FG005	0	0	0	0	0	0	0	0	0	0	0	0	0	0	0	0	0	0
AC197376.3_FG001	0	0	0	0	0	0	0	0	0	0	0	0	0	0	0	0	0	0
AC197377.3_FG001	0	0	1	0	0	0	0	3	1	2	7	6	0	3	1	0	2	0
AC197377.3_FG004	45	128	145	38	82	109	22	72	106	0	0	0	0	0	0	0	0	1
AC197387.3_FG004	74	349	439	115	112	236	18	76	123	352	1065	995	213	826	1011	109	468	403
AC197427.3_FG003	0	0	0	0	0	0	0	0	0	0	0	0	0	0	0	0	0	0
AC197432.4_FG001	0	0	0	0	0	2	0	0	2	8	21	44	4	18	35	0	5	4
AC197477.3_FG002	0	0	0	0	0	0	0	0	0	0	0	0	0	0	0	0	0	0
AC197526.3_FG003	0	0	0	0	0	0	0	0	0	0	0	0	0	0	0	0	0	0
AC197541.3_FG009	0	2	0	0	0	0	0	0	0	0	0	0	3	1	0	0	4	8
AC197544.3_FG002	0	0	0	0	0	0	0	0	0	0	0	0	0	0	0	1	3	3
AC197545.3_FG002	54	188	212	192	403	548	29	81	113	138	368	403	123	462	584	62	131	125
AC197555.3_FG008	20	41	50	15	15	34	2	8	4	344	741	834	159	522	625	243	1456	1271
AC197575.3_FG008	0	4	0	8	1	6	0	2	0	0	0	4	0	7	6	0	0	0
AC197577.2_FG002	0	0	0	0	0	0	0	0	0	0	0	0	0	0	0	0	0	0
AC197578.4_FG001	83	396	412	124	219	324	83	313	448	188	535	643	59	293	341	49	192	211
AC197583.2_FG003	0	0	1	0	0	0	0	3	3	0	0	0	0	0	0	0	0	0
AC197595.3_FG001	0	0	0	0	0	0	0	0	0	0	0	0	0	0	0	0	0	0
AC197672.3_FG002	2536	8063	10035	4040	8868	10495	1247	4340	5609	3799	10521	11874	2332	8469	9941	1975	3234	3175
AC197697.3_FG001	0	0	0	0	0	0	0	0	0	0	0	0	0	0	0	0	0	0
AC197699.3_FG002	26	51	52	26	7	11	0	3	16	8	32	71	2	37	48	6	14	14
AC197699.3_FG003	130	463	538	86	221	243	122	370	432	132	373	482	82	299	539	48	346	328
AC197699.3_FG005	0	0	0	0	0	0	0	0	0	0	0	0	0	0	0	0	0	0
AC197699.3_FG006	0	12	23	0	17	1	1	6	9	0	5	6	0	0	0	0	1	7
AC197699.3_FG008	0	1	3	3	3	2	0	0	0	1	3	1	0	1	0	0	0	0
AC197699.3_FG009	0	0	0	0	0	0	0	0	0	0	0	0	0	0	0	1	0	0
AC197699.3_FG010	0	0	0	0	0	0	0	0	2	0	0	0	0	0	0	0	2	2
AC197705.4_FG001	0	12	10	1	4	3	18	9	54	0	0	4	1	10	6	0	3	3
AC197705.4_FG003	115	65	269	0	8	5	6530	18172	24402	4	22	28	1	34	307	5270	44505	39178
AC197705.4_FG004	0	1	2	2	6	8	8	22	20	0	0	3	1	7	6	0	21	14
AC197705.4_FG006	295	1276	1461	518	1048	1281	191	605	792	534	1507	1630	390	1317	1591	198	563	653
AC197705.4_FG007	235	849	1085	564	1051	1347	156	501	643	544	1619	1588	377	960	1488	196	839	837
AC197705.4_FG008	8	27	28	9	16	8	12	30	50	13	33	35	0	15	27	2	14	22
AC197705.4_FG011	1322	4580	5885	4289	8320	11235	1294	3739	5213	1378	3927	4786	1687	6983	8767	903	4287	3795
AC197714.3_FG004	8	34	44	34	65	75	8	56	61	38	116	65	18	130	121	11	37	23
AC197717.3_FG002	1359	4707	5865	606	965	1436	1029	3188	4472	249	652	632	180	423	605	118	819	760
AC197718.3_FG002	0	0	0	0	0	0	0	0	0	0	0	2	0	2	0	0	0	0
AC197738.3_FG007	0	0	0	0	0	0	0	0	0	0	0	0	0	0	0	0	0	0
AC197757.3_FG002	1	0	4	0	0	5	0	2	5	0	0	0	0	0	0	0	3	0
AC197757.3_FG003	0	0	0	0	0	0	0	0	0	0	0	0	0	0	0	0	0	0
AC197758.3_FG004	10	19	43	7	7	7	2	16	25	11	71	59	12	44	44	14	84	86
AC197764.4_FG003	0	0	2	0	0	0	0	3	0	0	2	2	0	6	1	2	8	7
AC197770.3_FG002	1	8	15	11	10	31	0	6	11	11	26	18	11	30	29	3	5	7
AC197771.3_FG001	0	19	22	13	29	34	2	12	20	23	61	59	4	39	38	0	7	6
AC197783.3_FG005	21	36	56	38	18	53	13	19	21	1	4	3	0	3	6	1	1	1
AC197835.3_FG001	0	0	0	0	0	0	0	0	2	0	0	0	0	0	0	0	0	0
AC197837.3_FG003	0	0	0	0	0	0	0	0	0	0	0	0	0	0	0	0	0	0
AC197901.3_FG003	0	5	22	0	0	1	0	6	0	2	1	16	2	0	8	0	2	2
AC197903.4_FG001	0	0	0	0	0	0	0	0	1	0	0	0	0	0	0	0	0	0
AC197909.3_FG002	0	1	2	1	0	1	0	0	1	1	0	0	1	1	1	0	1	0
AC198019.2_FG004	2	0	3	0	2	0	3	7	8	3	0	7	0	9	1	1	12	12
AC198025.3_FG001	4	14	19	55	92	125	26	31	27	0	4	9	8	43	36	5	15	8
AC198081.2_FG001	0	1	0	0	0	0	0	0	0	0	0	0	0	0	0	0	0	0
AC198081.2_FG005	0	0	0	0	0	0	0	0	0	0	0	0	0	0	0	0	0	0
AC198122.3_FG002	2	0	4	0	0	2	0	5	5	0	0	0	0	0	0	0	0	0
AC198169.4_FG004	1917	5841	7532	2844	5223	6195	905	3395	4461	1419	3907	4364	1431	3145	5507	572	3107	2935
AC198174.4_FG001	0	1	5	10	10	35	1	10	6	1	0	1	0	7	2	6	10	4
AC198179.4_FG001	0	0	0	0	3	2	0	1	1	0	0	0	0	0	6	0	0	5
AC198179.4_FG002	0	0	0	0	3	0	0	0	0	0	0	0	0	0	0	0	0	0
AC198206.5_FG001	75	221	305	65	136	181	36	113	132	105	206	320	35	121	154	3	67	54
AC198208.3_FG002	0	0	0	0	0	0	0	0	3	0	0	0	1	0	0	0	2	1
AC198223.3_FG001	0	0	0	0	0	0	0	0	0	0	2	0	0	0	0	0	0	0
AC198229.4_FG002	20	74	79	26	71	107	10	29	58	2	5	3	0	7	3	0	3	0
AC198230.4_FG003	0	0	0	0	0	0	0	0	0	0	0	0	0	0	0	0	0	0
AC198291.3_FG001	0	0	0	0	0	1	0	0	1	0	0	0	4	1	3	0	0	0
AC198324.3_FG003	0	2	0	1	1	0	0	0	2	0	0	2	0	0	0	0	0	0
AC198352.4_FG005	0	3	0	0	0	1	0	1	0	7	16	35	0	3	1	0	0	1
AC198353.5_FG001	1286	5013	6064	863	1652	2134	488	1811	2268	676	1820	2257	367	1052	1597	233	1454	1284
AC198353.5_FG004	1706	5430	7168	2830	4638	6697	658	2346	3190	1405	3817	4656	1173	3950	5190	547	1929	1992
AC198357.3_FG002	0	0	0	0	0	0	0	0	0	0	0	0	0	0	0	0	0	0
AC198361.3_FG004	613	2018	2403	2471	4565	5519	280	819	1300	772	2164	2328	1393	3592	5042	200	859	812
AC198366.3_FG004	2	8	13	3	6	9	13	14	29	0	4	2	0	0	6	34	275	193
AC198371.3_FG003	0	0	1	0	0	0	0	0	0	0	0	0	0	1	4	0	1	0
AC198371.3_FG011	0	0	1	0	1	1	4	0	1	0	0	1	0	0	2	0	0	0
AC198379.3_FG006	0	0	0	0	0	0	0	0	0	0	0	0	0	0	0	0	0	0
AC198380.3_FG001	6	9	9	13	30	43	6	6	12	0	1	6	4	3	4	0	0	2
AC198382.3_FG001	1	0	1	6	4	19	0	1	0	6	14	23	29	105	93	1	6	7
AC198386.3_FG001	1	0	1	3	7	21	1	6	3	0	0	1	3	17	12	0	0	0
AC198393.3_FG001	0	2	1	7	13	18	2	2	3	1	1	1	0	7	4	0	0	0
AC198398.3_FG003	0	0	0	0	0	0	0	0	0	0	0	0	0	0	0	0	0	0
AC198403.3_FG001	4	16	14	12	22	31	45	124	136	21	14	38	13	27	35	26	229	182
AC198414.2_FG001	0	0	0	0	0	0	0	0	0	0	0	0	0	0	0	0	0	0
AC198418.3_FG005	5161	15613	20692	18362	33794	44413	1903	6533	7846	4989	12607	15627	8550	25548	35677	2333	9615	8537
AC198421.3_FG003	2	5	8	0	0	0	0	1	1	41	136	153	69	256	244	38	124	95
AC198479.3_FG007	0	0	0	0	0	0	0	0	0	0	0	0	0	0	0	0	0	0
AC198481.3_FG004	1422	5068	6179	2970	6054	8073	794	2722	3453	1853	5644	6391	1446	6655	6644	1038	1209	1380
AC198490.3_FG003	62	98	308	95	258	277	31	50	162	92	187	180	28	191	233	25	102	25
AC198494.3_FG002	3	8	15	11	15	11	8	22	36	4	7	6	0	4	4	6	46	61
AC198506.3_FG001	0	0	0	0	0	2	0	1	1	0	0	0	0	0	0	0	4	2
AC198509.3_FG004	0	0	0	0	2	0	0	0	0	0	0	0	0	0	0	0	0	0
AC198509.3_FG005	3	21	17	9	3	21	5	18	34	6	6	15	0	15	5	0	2	1
AC198510.5_FG002	0	0	0	0	1	0	0	0	0	0	0	0	0	0	0	0	0	0
AC198515.3_FG011	0	0	0	0	0	0	0	0	0	0	0	0	0	0	0	0	0	0
AC198518.3_FG002	0	0	2	2	0	5	1	2	0	4	36	15	2	9	9	0	12	3
AC198518.3_FG003	241	949	1143	286	467	598	234	714	953	473	1254	1313	181	499	632	131	603	549
AC198518.3_FG005	0	1	1	0	4	1	4	22	29	0	6	0	0	4	3	0	0	0
AC198597.4_FG001	0	0	0	0	0	0	0	0	0	0	0	0	0	0	0	0	0	0
AC198605.3_FG005	0	0	0	0	0	0	0	0	0	0	0	0	0	0	0	0	0	0
AC198691.3_FG005	0	0	0	0	0	0	0	0	0	0	0	0	0	0	0	0	0	0
AC198699.3_FG004	8	73	82	10	23	47	6	15	44	965	2293	2715	330	630	1293	269	1947	1653
AC198700.2_FG004	8	10	27	1	5	8	0	8	5	1	0	2	0	0	0	0	0	0
AC198721.3_FG002	0	0	0	0	0	0	0	1	0	0	1	2	0	0	0	0	2	0
AC198723.4_FG002	0	9	2	3	2	5	59	107	194	0	0	2	0	1	3	17	111	158
AC198723.4_FG003	0	7	2	3	3	3	49	92	178	0	0	1	0	1	2	10	66	97
AC198725.4_FG004	83	278	277	39	88	98	19	107	123	75	150	168	32	217	207	3	73	69
AC198725.4_FG007	192	723	856	408	814	1063	204	645	855	423	1221	1445	295	1250	1503	213	565	485
AC198725.4_FG009	6	2	3	1	1	2	0	0	3	2	9	8	8	10	3	0	2	0
AC198743.3_FG008	85	272	332	106	139	267	72	270	291	0	2	0	0	2	0	0	0	2
AC198744.3_FG004	0	0	0	0	0	1	0	0	0	0	1	0	0	0	0	0	1	2
AC198752.4_FG004	15	38	33	6	34	33	5	16	9	0	2	0	0	0	0	0	0	0
AC198766.3_FG005	0	0	0	2	2	0	0	0	0	0	0	0	0	1	0	0	0	0
AC198773.3_FG003	0	0	0	0	0	0	0	0	0	0	0	0	0	2	0	0	0	0
AC198781.3_FG002	0	0	0	0	0	0	0	0	0	0	0	0	0	0	0	0	0	0
AC198787.3_FG001	0	0	0	0	0	0	0	0	0	0	0	0	0	0	0	0	0	0
AC198787.3_FG004	0	0	0	0	0	0	0	1	0	0	0	0	0	0	0	0	0	0
AC198787.3_FG009	6	27	29	15	0	63	7	15	22	1	8	5	1	7	2	1	1	0
AC198871.3_FG002	0	72	96	27	154	151	1	41	27	42	49	64	29	123	159	5	24	28
AC198901.4_FG004	0	3	7	0	0	0	1	1	0	3	4	2	0	0	0	0	0	0
AC198923.4_FG002	28	189	73	46	33	52	12	7	18	179	156	701	44	174	216	2	21	11
AC198937.4_FG003	62	191	267	99	182	290	27	84	82	49	147	143	81	132	160	16	100	76
AC198937.4_FG005	0	0	0	0	2	1	0	0	0	0	0	0	0	0	0	0	0	0
AC198940.4_FG008	0	2	2	2	0	1	2	2	1	1	2	1	0	3	0	0	0	2
AC198979.4_FG009	0	0	0	0	1	1	0	1	0	0	0	0	0	0	0	0	0	0
AC198981.4_FG001	0	0	0	0	0	0	0	0	0	0	0	0	0	0	0	0	0	0
AC198982.3_FG006	574	1841	2490	947	1916	2355	262	923	1229	527	1237	1556	574	1476	2162	247	1136	1005
AC198993.3_FG004	0	0	0	0	0	0	0	0	0	0	0	0	0	0	0	0	0	0
AC198995.3_FG003	0	0	0	0	0	0	0	0	0	0	0	0	0	0	0	0	0	0
AC199001.3_FG005	242	948	1141	512	995	1314	79	183	261	728	1875	2296	461	1789	2034	97	345	291
AC199005.2_FG003	0	0	0	0	0	0	0	0	0	0	0	0	0	0	0	0	0	0
AC199039.3_FG003	0	5	24	24	39	65	6	24	32	2	13	4	15	14	19	2	5	8
AC199043.2_FG002	2	3	2	0	0	0	0	8	6	2	7	7	0	0	2	0	9	3
AC199054.3_FG003	0	0	0	0	0	0	0	0	0	28	53	46	10	41	47	4	27	17
AC199054.3_FG007	0	0	0	0	0	1	0	1	5	0	0	0	0	0	0	0	0	0
AC199058.2_FG001	28	132	174	61	213	155	42	88	152	37	91	98	28	72	83	24	68	50
AC199067.2_FG004	18	107	106	34	74	85	31	68	64	64	130	153	28	105	127	9	61	41
AC199068.2_FG017	76	302	378	228	402	540	14	60	73	468	1314	1442	170	591	754	123	417	374
AC199084.3_FG004	0	0	0	0	0	0	0	0	0	0	0	0	0	0	0	0	2	0
AC199175.2_FG003	2	6	10	6	11	10	2	4	0	1	2	8	0	2	5	0	2	3
AC199175.2_FG006	3	5	7	2	7	6	0	3	2	0	1	0	1	0	2	0	0	0
AC199182.3_FG003	11	10	22	295	556	801	2	9	16	204	867	922	169	768	731	251	894	871
AC199183.3_FG001	0	0	0	0	0	0	0	0	0	0	0	0	0	0	0	0	0	0
AC199194.3_FG002	0	1	0	48	4	117	1	5	5	0	3	4	14	61	62	0	0	1
AC199198.3_FG002	10	33	46	18	0	45	3	13	18	5	22	19	5	16	25	3	10	16
AC199198.3_FG003	11	27	35	18	0	45	3	13	17	4	23	19	3	16	23	3	10	16
AC199204.3_FG002	0	4	0	0	1	0	2	0	0	0	0	2	0	0	2	0	0	0
AC199217.3_FG004	0	0	0	0	0	0	0	0	0	0	0	0	0	0	0	0	0	0
AC199315.4_FG001	105	329	401	248	360	449	353	856	1261	81	198	263	90	172	354	41	379	296
AC199315.4_FG002	0	0	0	0	0	0	0	0	0	0	0	0	0	0	0	0	0	0
AC199325.3_FG001	0	0	0	0	0	0	0	0	0	0	0	0	0	0	0	0	0	0
AC199325.3_FG005	0	0	1	0	0	0	0	0	0	0	0	0	0	0	0	0	0	0
AC199335.3_FG002	0	0	0	0	0	0	0	0	0	0	0	0	0	0	0	0	0	0
AC199343.3_FG013	0	0	4	1	4	2	0	0	0	2	1	4	2	0	4	0	0	1
AC199355.3_FG004	0	0	2	5	1	2	3	0	1	0	0	0	0	0	0	0	0	0
AC199363.4_FG003	225	482	671	170	479	584	88	292	423	167	569	665	205	676	894	112	307	240
AC199370.4_FG006	0	0	0	0	0	0	0	0	0	0	0	0	0	0	0	0	0	0
AC199379.4_FG001	198	415	552	92	175	273	146	358	634	0	0	0	0	0	0	0	0	0
AC199379.4_FG008	0	0	0	0	0	0	0	0	0	0	0	0	0	0	0	0	0	0
AC199382.3_FG005	0	0	2	0	0	0	0	0	0	1	0	1	0	0	0	0	0	0
AC199384.3_FG002	7	13	19	15	49	30	5	17	19	7	19	20	5	24	28	12	9	16
AC199421.3_FG001	0	0	0	0	0	0	0	2	0	0	0	0	0	0	0	0	0	0
AC199439.4_FG005	121	418	522	159	376	441	2585	5762	8762	375	722	853	142	368	590	1961	8083	6785
AC199479.4_FG004	0	0	0	0	0	0	0	0	0	0	0	0	0	0	0	0	0	0
AC199481.3_FG001	1	0	1	2	0	6	0	0	4	1	0	3	1	4	10	0	3	3
AC199487.4_FG002	13	18	38	15	63	55	1	5	18	12	30	41	9	31	12	2	4	3
AC199487.4_FG003	16	62	86	44	124	130	10	21	58	29	68	90	20	84	66	9	5	12
AC199488.4_FG003	0	0	0	2	5	2	1	2	0	1	5	2	1	9	0	0	0	0
AC199488.4_FG004	2	8	4	3	9	13	2	3	5	1	2	11	0	9	9	1	1	6
AC199492.3_FG001	0	0	0	0	0	0	0	0	0	0	0	0	0	0	0	0	0	0
AC199517.4_FG001	5	2	4	0	3	0	0	8	6	0	0	0	0	0	0	0	3	6
AC199517.4_FG006	5	6	4	0	3	0	1	15	4	0	0	0	0	0	0	0	2	1
AC199524.3_FG002	0	0	0	0	0	0	0	0	0	0	0	0	0	0	0	0	0	0
AC199526.5_FG001	0	0	0	0	2	0	0	0	2	20	90	56	7	60	35	9	19	14
AC199526.5_FG002	4821	15982	19779	5811	13142	14503	6969	17869	23808	10092	21409	26572	5371	18579	22264	3647	28673	23965
AC199526.5_FG003	790	2675	3265	1305	2717	3115	400	1527	1907	849	2402	2859	962	3071	3935	458	2004	1997
AC199541.4_FG001	1916	7575	8361	2266	4144	5079	807	2460	2982	980	3759	3893	870	2556	3589	400	2746	2223
AC199541.4_FG002	1051	3649	4345	1063	2348	2401	376	1252	1366	847	3439	3231	772	2260	3231	349	2394	1854
AC199541.4_FG004	733	2385	3005	690	1350	1638	241	716	922	718	2459	2498	676	1668	2484	301	1902	1433
AC199541.4_FG007	121	450	498	59	39	187	70	148	279	54	175	159	25	62	83	22	165	146
AC199543.4_FG004	0	0	0	0	1	0	0	0	0	0	0	0	0	0	0	0	0	0
AC199554.2_FG003	0	0	0	0	0	1	0	0	0	0	0	0	0	0	0	0	0	0
AC199571.3_FG001	43	142	192	62	243	172	38	130	174	9	22	17	9	22	22	2	13	7
AC199571.3_FG003	279	895	1294	360	699	925	124	468	580	23	105	103	25	118	128	17	29	24
AC199571.3_FG004	242	741	962	354	630	794	136	499	628	155	396	370	111	319	338	41	197	157
AC199572.3_FG005	3	8	20	1	9	11	0	3	2	0	0	0	0	0	0	0	0	0
AC199577.4_FG004	0	0	0	0	0	0	0	0	0	1	0	0	2	0	0	0	0	0
AC199624.4_FG007	2	7	11	4	20	6	2	4	3	0	3	6	0	10	7	2	1	1
AC199632.4_FG007	13	44	84	40	52	107	13	33	43	46	89	100	11	95	92	16	28	34
AC199638.4_FG001	0	0	0	0	0	0	0	0	0	0	0	0	0	0	0	0	0	0
AC199701.4_FG001	8	0	6	9	72	15	16	11	22	1	1	1	0	1	1	0	0	2
AC199703.3_FG003	21	74	83	64	97	108	24	43	77	11	22	17	7	41	45	1	15	22
AC199705.3_FG006	0	0	0	0	0	0	0	0	0	0	0	0	0	0	0	0	0	0
AC199705.3_FG008	1335	3811	5065	1431	2774	3501	1288	3938	5465	958	2635	2832	688	2288	3407	976	3153	2988
AC199728.4_FG006	0	0	0	1	0	0	0	0	0	0	1	6	0	0	1	0	0	2
AC199765.4_FG008	458	1552	2041	668	1581	1660	320	1074	1347	1088	2227	2681	474	1754	1948	477	2058	1861
AC199768.4_FG008	0	0	0	0	0	0	0	0	0	8	8	18	7	18	32	1	14	14
AC199771.4_FG001	0	0	0	0	0	0	0	0	0	0	0	0	0	0	0	0	0	0
AC199777.3_FG001	0	0	0	0	0	0	0	0	0	0	0	0	0	0	0	0	0	0
AC199779.3_FG006	17	33	42	9	25	46	69	238	293	24	55	59	6	26	47	28	233	179
AC199782.5_FG001	542	1684	2097	914	1415	1848	485	1691	2163	1022	2567	2778	692	1417	2624	312	2238	1924
AC199782.5_FG002	550	2005	2608	1207	2108	2552	591	1517	2120	1753	4889	5295	1033	2475	4084	206	1197	1109
AC199782.5_FG003	6	33	28	9	10	10	4	20	20	23	40	49	9	15	33	6	32	16
AC199790.4_FG013	0	0	0	0	0	0	0	0	0	0	0	0	0	0	4	0	0	0
AC199801.4_FG005	0	0	0	0	0	0	0	0	0	0	0	0	0	0	0	0	0	0
AC199810.3_FG003	0	1	0	0	4	0	0	3	3	0	0	0	0	1	0	0	0	0
AC199820.4_FG006	0	0	0	0	1	0	1	10	9	0	0	0	0	0	0	0	0	0
AC199826.4_FG003	25	67	83	15	33	50	8	13	46	25	82	91	4	24	35	1	11	12
AC199843.4_FG007	31	141	171	104	208	242	36	122	159	54	203	179	63	221	200	34	143	128
AC199857.4_FG004	0	0	0	0	0	0	0	0	0	0	0	0	1	0	0	0	0	0
AC199873.4_FG002	0	0	0	0	12	8	0	0	0	1	1	7	2	9	11	7	47	45
AC199875.3_FG002	0	0	0	0	0	0	0	0	0	0	0	0	0	0	0	0	0	0
AC199893.4_FG002	0	0	5	0	0	1	0	0	0	9	31	40	10	16	22	3	25	32
AC199908.4_FG002	0	0	0	0	0	0	0	0	0	1	0	0	0	0	0	0	0	0
AC199911.5_FG001	6	23	11	15	18	41	4	15	16	3	3	22	4	5	9	0	11	15
AC199918.4_FG003	0	0	1	0	0	0	0	1	0	0	1	1	0	1	0	1	0	2
AC199932.4_FG002	0	0	0	2	0	9	3	2	0	0	0	0	0	0	1	0	4	0
AC199956.4_FG003	1	9	0	1	0	7	0	0	4	0	0	0	0	0	0	0	0	0
AC199961.4_FG001	147	477	718	479	4287	1065	70	184	341	220	586	616	223	636	1135	75	506	373
AC199961.4_FG004	0	0	1	2	1	14	0	0	3	13	33	44	7	33	20	11	8	9
AC200038.4_FG011	0	0	0	0	0	0	0	0	0	0	0	0	0	0	0	0	0	0
AC200045.3_FG006	8	29	63	19	51	68	12	14	26	24	57	78	20	60	80	24	43	46
AC200047.3_FG004	0	0	0	0	0	0	0	0	0	0	2	0	1	3	0	5	5	13
AC200057.4_FG006	0	0	1	3	17	21	6	8	22	0	5	0	0	0	5	0	0	0
AC200057.4_FG007	128	463	536	121	259	284	61	270	260	227	520	540	52	187	245	38	145	157
AC200065.5_FG009	0	0	0	0	0	1	3	3	3	0	0	1	0	1	2	0	0	0
AC200069.4_FG002	0	0	0	0	0	0	0	0	0	0	0	0	0	0	0	0	0	0
AC200099.4_FG003	1	14	9	2	9	23	0	0	0	2	9	19	5	22	40	0	2	2
AC200099.4_FG006	7	47	33	47	126	140	22	97	56	13	24	71	58	196	244	2	19	17
AC200106.4_FG003	1	4	9	4	0	11	1	0	8	5	3	6	3	2	6	1	13	6
AC200112.4_FG007	0	0	0	0	0	0	0	0	0	0	0	0	0	7	2	0	0	0
AC200112.4_FG008	0	0	0	0	0	0	0	0	0	0	0	0	0	0	0	0	0	0
AC200117.3_FG004	0	0	0	0	0	0	0	0	0	0	0	0	0	0	0	0	0	0
AC200122.4_FG004	0	16	14	0	6	0	0	1	3	10	5	8	2	6	7	2	0	0
AC200124.3_FG005	0	0	0	0	0	0	0	0	0	0	0	0	0	0	0	0	0	0
AC200138.3_FG003	0	0	0	0	0	0	0	0	0	0	0	0	0	0	0	0	0	0
AC200143.3_FG003	0	0	0	0	2	0	0	0	0	0	0	0	0	0	0	0	3	0
AC200171.2_FG001	0	0	0	0	0	0	0	0	0	0	0	0	0	0	0	0	0	0
AC200178.2_FG002	0	12	17	48	91	89	0	7	0	5	36	36	27	154	148	0	3	1
AC200178.2_FG003	0	1	3	9	27	18	0	1	0	0	23	24	42	132	95	0	0	1
AC200207.2_FG001	2	7	10	9	10	37	2	10	6	0	0	0	0	0	0	0	0	0
AC200209.1_FG001	214	579	776	499	926	1329	138	400	470	211	633	783	85	374	399	134	555	492
AC200210.1_FG006	89	508	567	190	370	524	130	380	417	198	501	631	112	526	531	150	316	308
AC200215.3_FG002	1	7	2	2	4	7	1	0	4	0	1	8	2	3	2	0	1	2
AC200225.5_FG001	0	0	0	0	0	2	0	0	0	0	0	0	0	2	0	0	0	1
AC200228.4_FG001	0	0	0	0	0	0	0	0	0	0	0	0	0	0	0	0	0	0
AC200234.3_FG001	0	0	0	0	0	0	0	0	0	0	0	0	0	0	0	0	0	0
AC200234.3_FG006	0	0	0	0	0	0	0	0	0	0	0	0	0	0	0	0	0	0
AC200240.3_FG002	0	1	0	0	0	0	0	0	0	0	2	1	0	0	1	0	0	0
AC200256.3_FG003	0	0	0	0	2	0	0	1	0	0	3	0	0	1	2	0	0	0
AC200287.4_FG006	123	203	702	140	100	276	184	182	526	110	224	292	106	200	346	22	133	122
AC200298.4_FG001	29	106	163	9	14	11	30	118	187	43	87	102	2	32	34	13	103	84
AC200490.3_FG005	0	0	0	4	0	0	0	0	0	0	0	0	0	1	0	0	0	0
AC200495.3_FG001	0	0	0	0	0	0	0	0	0	3	19	16	6	21	13	0	5	4
AC200497.4_FG015	0	0	0	0	0	0	0	0	0	0	0	0	0	1	0	0	0	0
AC200535.4_FG002	0	0	0	0	0	0	0	0	0	0	0	0	0	0	0	0	0	0
AC200540.3_FG002	0	0	1	0	0	3	1	0	0	0	2	0	0	0	0	0	0	0
AC200565.4_FG001	0	0	1	0	7	0	0	0	1	0	1	2	0	2	1	1	0	0
AC200622.3_FG005	8	9	10	7	3	14	3	4	7	0	0	4	0	0	0	0	0	0
AC200627.3_FG005	0	0	0	0	0	0	0	0	0	0	0	0	0	0	0	0	0	0
AC200670.3_FG002	0	0	0	0	0	0	0	0	0	0	0	0	0	0	0	0	0	0
AC200725.4_FG003	19	59	80	23	40	42	15	39	60	25	43	48	8	68	86	10	91	71
AC200725.4_FG008	0	0	0	0	1	1	0	1	0	0	0	0	0	0	0	0	0	0
AC200739.5_FG001	0	0	0	0	0	0	0	0	0	0	2	11	7	32	10	4	6	2
AC200753.3_FG003	37	172	164	130	198	247	29	118	110	67	145	197	54	213	250	10	91	70
AC200754.4_FG004	139	521	635	169	283	402	64	246	230	133	444	466	152	487	510	114	327	315
AC200876.4_FG002	0	0	0	10	13	7	3	15	8	0	0	1	2	4	8	0	0	0
AC200876.4_FG003	0	0	0	10	19	38	4	27	38	0	1	3	6	29	15	6	6	14
AC200881.4_FG002	0	0	0	0	0	0	0	0	0	0	0	0	0	0	0	0	0	0
AC200881.4_FG007	7	32	54	41	25	86	5	15	33	2	6	5	2	25	18	5	8	9
AC200884.4_FG002	0	0	0	0	0	0	0	0	0	0	0	0	0	0	0	0	0	1
AC200887.4_FG002	0	0	0	0	0	0	0	0	0	0	0	0	1	1	1	0	0	0
AC200904.3_FG003	0	0	0	0	0	0	0	0	0	0	0	0	0	0	0	0	0	0
AC201740.3_FG003	1	0	1	5	0	4	0	3	6	0	2	0	2	2	0	0	4	0
AC201767.3_FG003	1	0	10	11	30	43	0	6	4	0	3	1	11	42	45	2	0	0
AC201769.3_FG002	32	165	182	74	159	200	21	49	71	117	271	349	49	295	284	16	106	81
AC201791.3_FG005	0	0	0	0	0	0	0	0	0	0	0	0	0	0	0	0	0	0
AC201797.4_FG006	0	0	0	0	0	0	0	0	0	0	0	0	0	0	0	0	0	0
AC201798.4_FG005	0	0	0	0	5	0	0	0	0	0	0	0	1	0	0	0	0	0
AC201815.4_FG001	24	81	111	53	98	120	11	8	24	18	49	74	29	71	106	9	15	37
AC201828.3_FG002	0	0	0	0	0	0	0	0	0	10	22	55	10	43	40	0	5	2
AC201832.3_FG006	0	0	3	5	3	6	7	6	0	0	6	2	0	5	8	2	4	1
AC201888.3_FG013	0	2	1	0	0	5	0	0	2	6	0	0	0	0	4	0	0	1
AC201891.3_FG001	0	0	1	0	123	4	1	2	0	3	3	3	0	1	5	0	4	4
AC201898.4_FG004	0	0	0	0	0	0	0	3	2	0	4	1	0	0	0	2	4	3
AC201966.3_FG001	0	0	0	0	0	0	0	0	0	0	0	0	0	0	0	0	0	0
AC201969.4_FG005	27	40	70	26	17	51	5	26	34	7	22	25	2	25	16	6	8	6
AC201977.3_FG005	0	0	0	0	0	0	0	0	0	0	0	0	1	0	0	0	0	0
AC201985.4_FG003	5	20	18	3	0	12	0	10	9	2	21	9	3	25	8	0	4	6
AC201986.3_FG002	3	9	10	0	3	9	2	14	14	0	0	0	0	0	0	0	0	0
AC201995.4_FG001	0	1	0	0	0	0	0	3	4	0	0	0	0	3	1	0	1	2
AC202000.4_FG006	0	0	0	0	0	0	0	0	0	0	0	0	0	0	0	0	0	0
AC202011.3_FG010	1	12	16	9	19	20	2	4	4	14	66	41	13	18	29	3	4	5
AC202015.3_FG004	0	0	0	0	0	0	0	0	0	0	0	0	0	2	0	0	0	0
AC202040.4_FG002	0	1	0	0	0	0	0	0	4	0	0	0	0	0	0	0	0	0
AC202041.4_FG003	0	0	0	0	1	0	0	0	2	0	1	2	0	0	0	5	3	2
AC202069.3_FG002	0	0	3	1	0	1	122	353	428	0	0	0	0	6	1	22	98	100
AC202073.4_FG001	313	1412	1736	538	1069	1328	169	542	701	396	919	1206	364	935	1527	204	854	780
AC202076.3_FG009	0	0	0	0	0	0	0	0	0	0	0	0	0	0	0	0	0	0
AC202091.4_FG003	0	2	1	0	4	1	0	5	5	0	0	1	1	3	2	0	1	0
AC202092.2_FG003	9	6	10	4	6	4	1	4	9	0	0	0	0	0	0	0	0	0
AC202101.3_FG002	0	0	0	0	0	0	0	0	0	0	0	0	0	0	0	0	0	0
AC202107.3_FG001	30	158	208	69	96	150	6	46	55	37	178	153	15	97	93	8	41	32
AC202110.3_FG004	0	0	0	0	0	0	0	0	0	21	83	94	14	63	51	0	40	28
AC202122.2_FG001	0	0	0	0	0	0	0	0	0	0	0	0	0	0	0	0	0	0
AC202129.3_FG001	186	566	620	117	244	271	93	290	333	8	3	12	0	7	6	3	6	8
AC202139.3_FG008	0	0	0	0	0	0	0	0	0	0	0	0	0	0	0	0	0	0
AC202144.5_FG001	3	7	7	8	17	18	11	16	32	71	190	188	60	68	172	11	115	87
AC202172.3_FG004	0	0	0	0	0	0	0	0	0	0	0	0	0	0	0	0	0	0
AC202178.3_FG002	0	0	0	0	0	0	0	0	0	2	1	3	0	3	3	1	0	0
AC202179.3_FG004	0	0	0	0	0	0	0	0	0	0	0	0	0	0	0	0	0	2
AC202179.3_FG005	0	0	0	0	0	0	0	0	0	0	0	0	0	0	0	0	0	0
AC202181.3_FG010	0	0	5	0	0	1	0	5	5	99	172	235	22	177	185	12	90	70
AC202185.4_FG004	417	1537	1810	1308	2209	2850	127	344	498	1612	4130	4519	1100	2349	3544	56	369	363
AC202187.4_FG003	0	0	0	0	0	0	0	0	0	0	0	0	0	0	0	0	0	0
AC202384.4_FG009	0	0	0	4	11	7	2	3	6	0	0	0	0	0	0	0	0	0
AC202391.4_FG002	15	8	26	17	35	72	21	18	33	10	12	21	6	54	38	19	31	39
AC202396.4_FG010	46	166	149	233	742	591	63	240	301	4	10	13	29	50	41	6	15	12
AC202417.5_FG002	0	0	0	0	2	0	0	0	0	0	0	1	0	0	0	0	0	0
AC202432.3_FG006	6	18	14	20	16	22	5	18	19	22	68	199	27	177	142	40	32	37
AC202435.3_FG001	16	62	56	42	55	130	35	62	100	40	73	146	16	96	166	2	105	49
AC202435.3_FG003	24	117	120	149	228	230	28	69	101	18	23	55	36	62	89	4	64	60
AC202439.3_FG001	63	141	212	78	183	214	6	41	50	48	131	176	33	47	110	5	75	54
AC202439.3_FG006	45	197	224	81	100	163	34	142	167	88	210	283	83	209	290	48	225	226
AC202526.4_FG006	0	0	2	0	0	2	142	412	585	0	0	0	0	0	2	8	76	38
AC202532.4_FG006	0	0	0	0	0	0	0	0	0	0	0	0	0	0	0	0	0	0
AC202534.2_FG007	0	0	0	0	0	0	0	0	0	0	0	0	0	0	0	0	0	0
AC202549.3_FG008	0	0	1	2	3	1	1	1	0	33	124	145	85	419	373	12	50	37
AC202561.3_FG007	0	0	0	0	0	0	0	0	0	0	0	0	0	0	0	1	0	0
AC202567.4_FG004	6	15	17	18	18	21	17	60	37	2	24	22	8	19	30	1	22	6
AC202705.2_FG001	0	0	2	0	0	0	0	3	0	0	0	3	2	0	0	0	0	2
AC202707.3_FG002	0	12	29	1	8	2	2	4	10	4	7	8	6	4	13	0	5	0
AC202855.3_FG004	5	4	5	31	81	101	9	41	39	4	3	6	14	49	58	6	28	22
AC202864.3_FG002	34	140	142	38	94	108	18	60	91	45	151	154	13	52	51	1	19	23
AC202867.3_FG008	0	0	1	0	1	0	1	1	4	0	0	0	0	0	0	0	21	9
AC202867.3_FG010	0	0	0	0	0	0	0	0	0	0	0	0	0	0	0	0	0	0
AC202877.3_FG002	2	4	12	23	20	105	0	8	7	1	7	2	2	6	6	3	1	0
AC202900.3_FG001	10	2	2	0	5	5	0	3	7	5	8	1	2	0	5	2	8	10
AC202911.3_FG002	0	1	2	2	0	6	0	2	3	0	3	1	0	3	2	1	1	0
AC202915.3_FG002	331	983	1181	454	1039	1267	861	1890	2650	444	1071	1320	115	428	524	218	1408	1243
AC202921.3_FG004	0	0	0	0	0	0	0	0	0	0	0	0	0	0	0	0	0	0
AC202930.4_FG007	0	0	0	0	0	0	0	0	0	0	0	0	0	0	0	0	0	0
AC202930.4_FG008	0	0	0	55	102	171	0	0	0	0	0	0	0	0	0	0	0	0
AC202940.3_FG004	0	3	3	1	3	5	0	1	1	1	6	12	0	7	2	1	3	0
AC202950.3_FG008	0	0	0	0	0	0	0	0	0	5	11	26	0	0	1	9	27	24
AC202953.3_FG003	0	0	0	0	0	0	0	0	0	0	0	0	0	0	0	0	0	1
AC202959.3_FG001	0	2	0	10	27	46	0	0	1	0	0	0	0	0	0	0	0	0
AC202965.3_FG002	0	4	8	0	0	0	0	2	8	0	0	0	0	0	0	0	0	0
AC202974.3_FG004	17	84	83	37	79	91	7	9	18	37	98	118	17	55	66	4	1	5
AC202989.3_FG007	0	0	0	0	0	0	0	0	0	0	0	0	0	0	0	0	0	0
AC202991.3_FG003	0	0	0	0	0	0	0	0	0	0	0	0	0	0	0	0	0	0
AC203001.3_FG001	2	7	0	0	0	3	3	4	1	0	0	0	0	0	0	0	0	0
AC203006.3_FG005	0	0	0	0	0	0	0	0	0	0	0	0	0	0	0	0	0	0
AC203019.3_FG001	2	7	18	5	11	11	7	18	29	0	5	13	1	12	13	4	12	10
AC203027.3_FG003	0	0	0	0	0	0	0	0	0	0	0	0	0	0	0	0	0	0
AC203031.3_FG002	82	240	321	121	224	263	139	372	511	116	314	313	63	270	316	54	389	290
AC203048.3_FG001	15	69	93	48	94	156	13	27	25	19	70	98	22	119	110	41	30	37
AC203090.3_FG005	0	3	9	33	40	49	0	2	0	1	0	1	0	0	0	0	2	1
AC203093.3_FG001	2	2	2	0	2	6	2	1	2	6	22	38	6	17	16	12	6	15
AC203101.3_FG002	0	0	0	0	0	0	0	0	0	0	0	0	0	0	0	0	0	0
AC203148.3_FG005	0	1	2	1	4	1	1	2	6	0	0	0	1	0	2	0	0	1
AC203159.3_FG009	6	18	21	6	0	10	6	17	18	4	13	22	2	14	13	4	6	13
AC203159.3_FG010	0	0	0	0	0	0	0	0	0	0	0	0	0	0	0	0	0	0
AC203173.3_FG001	0	0	1	2	5	1	1	1	0	2	0	2	0	0	0	0	4	0
AC203173.3_FG002	0	9	7	35	95	126	0	9	7	0	2	4	0	1	8	0	0	2
AC203173.3_FG004	2340	8265	10532	18618	37313	46137	1671	5857	7174	4440	12169	14634	10938	33572	46242	2150	6732	6087
AC203176.4_FG003	0	2	0	0	0	0	0	0	2	6	7	5	0	1	0	2	11	7
AC203183.3_FG001	0	0	0	0	0	0	0	0	0	0	0	0	0	0	0	0	0	0
AC203208.4_FG001	0	0	0	0	0	0	0	0	0	0	0	0	0	0	0	0	0	0
AC203220.3_FG006	0	0	0	0	0	0	0	0	0	0	0	0	0	0	0	0	0	0
AC203227.3_FG001	0	0	0	0	0	0	0	0	0	0	0	0	0	0	1	0	0	0
AC203228.3_FG003	0	0	0	0	0	0	0	0	0	0	0	0	0	0	0	0	0	0
AC203237.3_FG001	1	5	7	1	2	6	0	0	5	0	2	2	0	2	2	0	1	2
AC203244.4_FG001	4	2	5	0	1	2	0	0	7	5	3	5	5	0	5	1	1	2
AC203253.4_FG001	53	149	215	45	111	115	52	137	241	87	153	206	22	93	111	31	189	176
AC203257.2_FG003	3	10	21	23	1	42	0	16	10	1	11	10	6	27	37	1	2	8
AC203260.3_FG003	0	0	0	0	0	0	0	0	0	0	0	0	0	0	0	2	0	0
AC203262.3_FG002	1	1	0	1	1	0	1	0	0	1	0	2	1	1	0	0	0	4
AC203265.3_FG002	0	0	0	0	0	0	0	0	0	0	0	0	0	0	0	0	0	0
AC203278.4_FG004	0	2	0	0	0	0	3	3	2	3	28	26	3	22	27	0	4	7
AC203280.3_FG001	1	1	0	0	2	0	0	0	0	0	0	0	0	1	1	0	0	0
AC203294.3_FG001	0	0	0	0	0	0	0	0	0	1	0	0	0	0	3	0	0	0
AC203294.3_FG008	18	27	58	6	20	15	4	17	22	14	63	45	7	19	24	1	25	13
AC203294.3_FG012	0	12	5	2	1	5	0	3	4	7	7	9	4	7	9	2	2	3
AC203306.3_FG003	0	0	0	0	0	0	0	0	0	0	0	0	0	0	0	0	0	0
AC203307.4_FG001	0	1	3	2	5	6	3	1	2	10	43	36	5	18	17	3	3	9
AC203311.3_FG005	3	14	17	32	45	80	0	1	3	0	0	0	0	0	0	0	0	0
AC203316.3_FG003	0	0	0	0	0	0	0	0	0	0	0	0	0	0	0	0	0	0
AC203316.3_FG004	0	0	0	0	0	0	0	0	0	0	0	0	0	0	0	0	0	0
AC203324.3_FG008	0	0	0	0	0	0	0	1	0	0	0	0	0	0	2	2	0	0
AC203332.3_FG001	0	0	0	0	0	0	0	0	0	0	0	0	0	0	0	0	0	0
AC203341.3_FG003	0	0	2	0	0	1	0	0	2	0	0	0	0	0	10	0	0	0
AC203359.3_FG001	0	0	0	0	1	0	0	0	0	16	39	60	18	37	45	6	30	23
AC203363.3_FG007	0	3	0	0	0	0	0	0	0	0	0	0	0	0	0	0	0	0
AC203365.3_FG004	0	2	0	0	0	0	0	0	0	2	3	3	1	0	5	0	0	0
AC203365.3_FG007	20	68	104	43	112	138	10	45	28	32	42	80	30	75	102	8	16	22
AC203366.4_FG001	187	674	907	496	1040	1259	186	524	720	283	697	878	283	1161	1328	298	647	653
AC203381.3_FG006	0	0	0	0	0	0	0	0	0	0	0	0	0	1	0	0	0	0
AC203382.3_FG005	0	56	28	0	0	0	0	4	0	0	0	0	0	0	0	0	0	0
AC203392.3_FG004	139	397	419	360	791	923	101	360	415	165	516	437	236	1092	1025	57	125	144
AC203394.3_FG004	1	0	7	4	1	6	0	8	3	115	167	231	93	211	247	21	158	149
AC203401.3_FG003	2	5	8	20	30	51	1	5	14	1	4	0	10	17	19	0	4	1
AC203408.4_FG003	0	0	0	2	0	0	0	2	0	0	0	0	0	4	2	0	0	2
AC203423.3_FG009	1	5	2	3	3	2	3	1	6	0	0	0	0	0	0	0	0	0
AC203424.3_FG001	320	1003	1364	379	706	950	240	727	981	519	1490	1760	241	793	1073	145	569	507
AC203430.3_FG007	1	2	2	1	0	0	0	4	3	3	2	9	0	2	1	0	3	2
AC203437.2_FG002	0	0	0	0	0	0	0	0	0	0	0	0	0	0	0	0	0	0
AC203439.3_FG005	2	11	16	10	15	18	22	53	69	6	9	10	4	9	11	3	15	6
AC203531.3_FG002	0	0	0	0	1	0	0	0	1	0	0	0	1	0	0	0	0	0
AC203535.4_FG001	579	2095	2695	1324	2567	3045	295	1048	1260	1107	3232	3552	1087	2937	4204	427	1043	1052
AC203535.4_FG002	277	836	1038	687	1414	1630	280	529	833	389	944	1202	472	1856	2034	189	1312	1156
AC203535.4_FG004	3497	11053	14069	6743	11707	15111	2354	7225	9943	2744	5601	8256	4155	10300	17572	1408	11926	9847
AC203535.4_FG006	6	44	50	21	49	57	4	33	23	6	0	5	0	8	0	0	0	3
AC203535.4_FG007	73	460	457	458	881	1003	30	55	85	65	164	209	287	835	1026	25	63	53
AC203570.4_FG005	95	285	328	51	115	149	121	339	429	83	266	229	39	140	152	28	214	153
AC203571.3_FG001	74	285	258	97	160	202	75	169	185	93	156	328	62	256	286	15	120	102
AC203571.3_FG007	0	0	0	0	0	0	0	0	0	0	0	0	0	0	0	0	0	0
AC203672.3_FG001	0	0	0	0	0	0	0	0	0	0	0	0	0	0	0	0	0	0
AC203748.3_FG002	9	17	44	22	22	63	17	26	56	5	14	33	7	29	29	11	13	17
AC203752.5_FG002	43	109	128	132	302	265	36	50	111	54	198	188	63	229	313	22	40	30
AC203753.4_FG006	58	229	325	93	21	359	33	183	228	84	263	313	104	262	406	52	178	202
AC203753.4_FG007	0	0	0	0	0	0	0	0	0	0	0	1	0	0	0	0	0	0
AC203754.4_FG007	3	36	35	43	0	141	9	57	69	6	10	10	1	12	11	1	20	2
AC203754.4_FG008	0	18	6	20	36	28	4	11	12	23	59	45	2	23	44	6	1	4
AC203761.3_FG002	123	442	475	892	1847	2326	54	205	219	166	401	440	459	1857	2003	51	145	199
AC203768.3_FG005	195	734	826	154	93	338	123	228	775	14	11	29	9	20	34	8	27	20
AC203774.3_FG004	0	0	0	0	0	0	0	0	0	0	0	0	0	0	0	0	0	0
AC203777.3_FG001	0	0	0	0	0	0	0	0	0	0	0	0	0	0	0	0	0	0
AC203777.3_FG004	0	0	4	3	2	6	0	2	0	0	0	0	3	2	1	0	2	0
AC203790.3_FG004	0	5	3	7	13	11	1	4	1	0	0	0	1	0	0	0	0	0
AC203802.2_FG005	0	0	0	0	0	0	0	0	0	0	0	0	0	0	0	0	0	0
AC203804.4_FG008	0	1	3	3	0	6	0	4	0	0	2	7	2	8	8	0	1	2
AC203806.3_FG006	13	26	45	28	2	45	30	96	113	1	0	5	3	22	24	1	23	5
AC203831.3_FG002	4	14	12	4	0	15	0	3	8	0	0	3	0	2	9	0	2	7
AC203834.4_FG004	0	7	0	6	1	9	1	10	12	0	1	0	1	0	4	0	2	0
AC203841.3_FG002	140	302	420	115	274	291	34	135	189	105	282	329	78	242	364	53	207	190
AC203841.3_FG009	335	1289	1428	728	1369	1573	255	700	868	656	1642	2078	455	1168	1911	107	575	530
AC203847.3_FG004	0	1	0	0	0	0	0	0	0	0	0	0	0	0	0	0	0	0
AC203847.3_FG009	1	0	0	0	0	0	0	0	0	0	0	0	0	0	0	0	0	0
AC203855.2_FG001	0	0	0	0	0	0	0	0	0	0	0	0	0	0	0	0	0	0
AC203862.4_FG001	39	123	142	53	126	98	8	30	45	120	240	307	86	328	471	23	86	112
AC203862.4_FG002	108	337	411	290	670	770	118	415	438	133	472	475	154	631	755	106	418	352
AC203865.3_FG001	113	401	458	114	211	245	116	314	390	191	487	496	99	286	458	59	293	312
AC203900.3_FG006	2	32	31	12	46	48	2	4	8	24	93	79	12	22	38	0	4	0
AC203909.3_FG003	9	68	126	6	9	13	65	130	195	33	120	108	4	16	27	14	107	133
AC203909.3_FG006	58	218	243	157	580	368	68	236	279	109	433	393	81	408	328	27	187	154
AC203909.3_FG007	1	0	0	0	0	0	0	0	0	0	0	0	0	0	0	0	0	0
AC203909.3_FG010	0	0	0	0	0	0	0	0	0	0	0	0	0	0	0	0	0	0
AC203925.3_FG002	0	0	2	0	0	2	0	0	0	0	0	0	0	0	0	0	2	0
AC203928.4_FG001	0	0	0	0	0	0	0	0	0	0	0	0	0	0	0	0	0	0
AC203944.4_FG002	0	1	15	4	2	1	0	1	0	0	0	0	0	0	0	0	0	0
AC203955.3_FG002	1	0	1	1	4	1	2	4	1	0	1	2	4	9	7	3	40	26
AC203955.3_FG005	38	138	154	105	149	309	37	78	98	7	14	33	13	50	60	3	23	32
AC203956.3_FG004	75	202	324	206	360	420	38	127	176	5	33	50	5	29	71	1	16	26
AC203957.3_FG001	0	0	0	0	0	0	0	0	0	0	0	0	0	0	0	0	0	0
AC203957.3_FG004	131	512	657	571	1153	1332	645	2018	2780	162	315	373	229	540	732	82	468	376
AC203966.5_FG002	891	2765	3261	1184	5707	2436	509	2043	2128	544	1926	1803	468	1930	2277	313	1880	1755
AC203966.5_FG003	16	69	55	26	76	94	15	43	36	145	275	438	170	502	713	0	64	63
AC203966.5_FG005	145	467	660	16	11	23	49	189	276	155	553	577	2	21	34	19	186	149
AC203966.5_FG006	0	2	0	0	5	0	1	2	0	2	0	2	0	0	0	0	0	0
AC203972.3_FG001	81	294	389	252	540	760	28	56	88	305	853	916	193	584	835	50	217	184
AC203972.3_FG003	0	8	7	0	1	2	5	0	0	0	0	0	2	1	2	0	1	0
AC203976.4_FG001	0	1	1	1	0	3	0	0	0	0	0	0	0	0	0	0	0	0
AC203980.3_FG003	0	0	0	8	25	20	0	2	2	0	0	0	0	0	0	0	0	0
AC203985.4_FG001	695	2281	3051	930	1773	2208	1683	4583	6376	530	1634	1801	238	730	838	959	4446	3748
AC203985.4_FG005	212	669	847	343	636	752	292	807	1173	325	901	1073	215	399	773	88	679	494
AC203986.3_FG013	58	171	223	68	114	153	15	51	60	56	113	163	41	133	175	5	49	51
AC203989.4_FG001	68	295	306	392	608	919	63	188	215	189	452	592	227	639	738	38	197	150
AC204007.3_FG001	2	10	6	7	1	14	3	9	10	1	6	4	0	3	2	0	0	0
AC204007.3_FG008	0	3	0	4	12	4	7	2	8	118	355	374	33	125	104	0	2	2
AC204009.3_FG009	0	0	0	0	0	0	0	0	0	1	0	3	1	2	5	4	25	23
AC204015.3_FG006	0	0	4	1	11	3	1	1	6	0	0	0	0	0	0	2	0	0
AC204017.4_FG003	0	0	0	0	1	0	0	2	0	0	0	0	0	0	0	0	1	0
AC204035.3_FG003	2	9	14	17	7	46	0	9	6	0	10	6	11	48	28	1	2	5
AC204048.3_FG002	0	0	1	3	3	3	0	0	0	4	3	2	3	0	3	0	0	0
AC204050.4_FG006	6	6	12	9	16	19	6	35	49	2	12	12	6	14	39	0	21	25
AC204051.3_FG001	0	4	6	58	74	122	2	3	13	0	8	3	14	60	58	1	2	0
AC204060.3_FG010	0	0	0	0	0	2	4	1	4	0	1	0	0	0	0	0	0	0
AC204070.3_FG004	33	102	162	83	118	152	22	60	84	61	137	170	48	129	238	29	105	71
AC204088.3_FG010	0	0	0	0	0	0	0	0	0	0	0	0	0	0	0	0	0	0
AC204212.4_FG001	629	2719	3371	169	270	352	150	442	628	390	901	1116	171	242	563	38	324	213
AC204213.1_FG007	1	1	1	1	9	1	0	0	0	0	0	0	0	1	1	0	0	0
AC204231.3_FG010	0	0	9	4	10	9	6	34	33	4	8	20	6	13	10	19	38	47
AC204252.3_FG001	0	2	3	39	62	112	8	8	14	0	4	8	16	32	15	6	7	6
AC204254.3_FG001	0	3	4	0	2	0	0	1	0	6	11	10	5	12	5	0	0	0
AC204271.3_FG003	0	0	0	0	0	0	0	0	0	0	0	0	0	0	0	0	0	0
AC204277.3_FG006	550	1768	2219	501	921	1260	352	1026	1284	492	1308	1472	453	1472	1937	265	838	714
AC204292.4_FG002	30	87	104	51	112	135	18	46	33	37	68	126	25	110	132	8	26	36
AC204292.4_FG003	41	245	208	6	27	23	27	79	132	48	55	101	1	20	20	11	45	49
AC204292.4_FG005	0	0	0	4	3	6	0	1	6	1	0	2	5	4	9	1	0	0
AC204292.4_FG006	0	3	4	0	0	2	2	3	4	0	0	0	0	0	2	0	0	0
AC204298.3_FG006	42	124	162	56	194	190	13	78	91	45	196	206	25	168	136	7	80	83
AC204300.3_FG003	4	8	1	7	16	16	0	6	0	6	10	18	4	14	16	0	0	6
AC204300.3_FG009	0	0	12	3	15	18	4	6	4	8	14	12	0	11	6	0	0	8
AC204306.3_FG007	0	0	0	0	120	1	0	0	1	0	1	1	0	0	0	0	0	0
AC204311.4_FG004	80	153	188	126	267	363	18	83	140	70	184	233	39	181	284	47	140	124
AC204325.3_FG003	0	0	0	0	0	0	0	0	0	0	0	0	0	0	0	0	0	0
AC204351.3_FG004	0	0	0	0	1	1	0	0	0	0	0	0	0	0	0	0	0	0
AC204352.3_FG012	0	0	0	0	0	0	0	0	0	0	0	2	0	0	0	0	0	0
AC204359.3_FG004	0	0	0	0	0	0	0	1	0	0	0	0	0	2	1	0	3	1
AC204359.3_FG005	102	508	500	106	252	308	48	144	142	261	741	804	127	539	469	40	180	179
AC204377.3_FG001	0	0	0	0	0	0	0	0	0	0	0	0	0	0	0	0	0	0
AC204381.3_FG001	31	125	130	234	428	623	39	181	228	50	136	194	126	512	452	123	199	213
AC204383.2_FG002	0	0	0	0	0	0	0	0	0	0	0	0	0	0	0	0	0	0
AC204387.3_FG002	8	41	56	8	12	11	4	26	23	6	25	26	1	0	10	0	4	0
AC204437.3_FG004	1	12	9	9	15	22	0	6	0	7	4	4	2	5	6	0	2	4
AC204472.3_FG002	25	76	90	13	28	40	9	61	85	15	52	70	0	38	38	5	35	24
AC204476.3_FG004	0	2	0	0	0	0	0	0	0	0	0	0	0	0	0	0	0	0
AC204502.4_FG006	26	190	187	102	201	267	26	69	100	86	162	210	47	127	177	7	44	46
AC204515.4_FG003	0	0	0	0	0	0	0	0	0	0	0	0	0	0	0	0	0	0
AC204515.4_FG006	31	106	119	27	63	59	5	12	8	35	87	113	25	61	85	3	23	22
AC204519.3_FG003	3	8	16	0	1	2	4	8	1	4	10	7	2	2	4	0	1	0
AC204520.3_FG005	0	0	0	0	0	0	0	0	0	0	0	0	0	0	0	0	0	0
AC204530.4_FG002	127	426	690	315	739	839	60	221	242	377	944	1223	203	611	977	59	308	283
AC204530.4_FG003	8	28	18	8	20	38	0	7	13	2	12	8	1	10	9	3	62	40
AC204530.4_FG006	97	348	442	251	628	731	417	1423	1691	230	709	733	207	642	844	205	1193	1159
AC204539.4_FG001	28	42	72	13	87	66	15	44	74	20	73	96	18	52	56	16	70	94
AC204539.4_FG002	108	267	415	120	304	331	104	234	354	65	244	320	48	215	209	49	250	237
AC204539.4_FG003	244	678	910	270	697	617	202	596	759	200	460	473	109	354	435	88	472	364
AC204540.3_FG001	0	8	10	1	0	1	2	11	14	0	0	0	0	10	4	0	0	6
AC204552.3_FG001	0	14	8	3	4	7	1	8	10	0	0	0	0	0	0	0	0	0
AC204563.3_FG011	1	0	0	0	4	1	0	0	2	0	2	1	0	0	1	0	0	2
AC204569.3_FG002	0	0	0	0	0	2	0	2	3	0	0	2	1	1	1	1	0	0
AC204573.3_FG002	0	0	0	0	0	0	0	0	0	0	0	0	0	0	2	1	2	0
AC204573.3_FG015	0	0	0	0	0	2	0	0	0	0	0	0	0	0	1	0	0	0
AC204581.3_FG003	0	0	0	0	0	1	2	0	0	0	0	0	0	0	0	0	0	0
AC204591.3_FG002	0	0	0	0	0	0	0	0	0	0	0	0	0	0	0	0	0	0
AC204604.3_FG008	185	391	611	270	511	639	101	357	490	243	653	812	186	541	868	62	400	337
AC204605.3_FG008	0	0	0	0	1	0	0	0	0	0	1	0	0	0	0	0	0	0
AC204611.4_FG001	47	186	156	30	34	46	32	88	93	61	113	136	15	42	49	19	89	80
AC204618.3_FG001	0	0	0	0	0	0	0	0	0	0	0	0	0	0	0	0	0	0
AC204619.3_FG003	216	1089	826	229	481	439	122	402	365	414	697	1492	120	401	636	45	704	551
AC204621.4_FG006	0	0	0	0	0	0	0	0	0	0	5	2	1	1	6	1	6	7
AC204636.3_FG003	0	1	0	3	0	7	0	1	2	0	1	0	0	1	4	0	0	0
AC204641.5_FG001	99	286	366	259	590	546	74	195	291	104	254	297	21	77	104	22	44	74
AC204641.5_FG003	1	0	1	0	0	0	0	1	1	0	2	0	2	4	4	0	2	0
AC204659.3_FG005	3	65	40	30	155	146	90	182	282	30	27	50	41	106	117	33	170	199
AC204662.3_FG005	1	12	5	20	74	38	1	2	8	2	6	9	8	62	68	0	5	2
AC204679.3_FG003	0	0	0	0	0	0	0	0	0	0	0	0	0	0	0	0	0	0
AC204687.3_FG001	0	0	0	0	0	0	0	1	0	0	0	0	0	0	0	0	0	0
AC204690.4_FG005	9	25	15	16	37	29	3	7	13	17	16	22	15	18	31	1	6	8
AC204703.3_FG007	0	0	0	0	0	0	0	0	0	0	0	0	0	0	0	0	0	0
AC204707.4_FG001	0	0	0	0	0	0	0	0	0	0	0	0	0	0	0	0	0	0
AC204710.4_FG003	0	0	0	0	0	0	0	0	0	0	0	0	0	2	0	0	0	0
AC204711.3_FG002	90	370	424	515	904	1045	440	1096	1423	572	1410	1619	299	923	1253	79	667	637
AC204711.3_FG003	7	9	5	1	4	0	3	0	8	0	0	3	0	0	1	0	5	0
AC204712.3_FG002	22	65	65	67	39	76	23	54	98	58	175	232	28	75	129	3	36	50
AC204712.3_FG006	0	0	0	0	0	0	0	0	0	0	0	0	0	0	0	0	0	0
AC204717.3_FG005	21	115	191	97	122	171	36	133	209	37	172	175	29	111	139	28	80	93
AC204763.2_FG001	4	11	25	3	6	10	4	6	13	13	23	17	1	0	0	2	9	5
AC204768.3_FG001	2	0	0	2	5	1	0	0	2	0	0	0	1	3	0	0	0	0
AC204772.2_FG002	0	6	12	5	11	2	1	6	5	0	8	5	0	6	0	1	4	4
AC204821.3_FG004	0	0	0	0	0	0	0	1	0	0	0	0	0	0	0	0	0	0
AC204845.3_FG008	0	0	0	1	0	0	1	0	1	8	9	11	5	7	7	0	11	6
AC204868.3_FG004	1	7	10	7	16	21	6	9	17	17	28	37	8	11	26	0	12	10
AC204887.4_FG003	5	18	29	27	65	87	0	0	3	0	7	0	6	60	50	2	1	11
AC204891.4_FG001	30	101	110	22	47	50	35	72	118	37	96	138	17	39	85	18	64	58
AC204893.3_FG001	40	85	159	38	59	76	53	228	320	1	0	0	0	1	2	0	0	0
AC204897.3_FG007	13	31	38	2	10	12	14	36	27	12	34	19	3	17	9	5	24	31
AC204931.3_FG002	0	0	0	0	0	0	0	0	0	6	11	27	5	19	12	3	5	6
AC204931.3_FG004	0	1	3	1	1	2	3	1	3	0	0	2	0	2	0	0	2	0
AC204944.3_FG004	0	0	0	0	0	1	0	0	0	0	0	0	0	0	0	0	0	0
AC204953.3_FG002	0	1	0	25	47	81	0	1	1	0	5	0	58	161	184	0	0	0
AC205008.4_FG002	30	128	161	42	105	128	18	95	109	76	184	226	54	176	210	17	131	115
AC205012.3_FG002	2	13	8	22	43	44	55	111	173	12	26	31	2	16	44	0	20	13
AC205026.3_FG003	0	0	0	0	0	0	0	0	0	0	0	0	0	0	0	0	0	0
AC205033.4_FG004	32	116	126	49	92	128	106	300	327	42	144	190	21	165	106	84	335	365
AC205035.3_FG004	2	4	2	0	0	0	0	1	0	0	0	0	1	0	0	0	0	0
AC205057.3_FG002	57	171	224	508	1151	1152	208	469	721	107	259	370	181	580	669	42	562	483
AC205057.3_FG004	270	722	1069	267	435	598	3499	10103	14048	152	557	578	53	359	371	137	982	991
AC205060.2_FG002	36	91	139	29	74	93	18	87	79	14	43	14	8	23	38	1	28	27
AC205066.3_FG008	5	7	16	5	12	11	12	7	10	1	1	3	4	7	13	2	1	7
AC205077.3_FG003	534	1265	1772	819	1296	1835	201	761	934	1801	5529	6009	1032	4457	4290	920	2968	2711
AC205078.3_FG009	0	0	0	0	0	0	0	0	0	0	0	0	0	0	1	0	0	0
AC205100.3_FG001	1	0	3	2	4	5	0	4	0	6	7	5	2	0	3	1	0	1
AC205104.3_FG003	0	0	0	0	0	0	0	4	0	0	0	0	1	0	0	0	0	0
AC205106.3_FG004	0	0	0	0	0	0	0	0	0	0	0	0	0	0	0	3	1	1
AC205110.4_FG001	0	0	0	0	0	0	0	0	0	0	0	1	0	4	0	0	0	0
AC205122.4_FG003	1091	3954	5033	1653	2734	3443	1158	3227	4686	2876	7190	7868	1966	3704	7113	1327	9286	7760
AC205122.4_FG005	0	0	0	0	1	4	0	2	2	0	0	2	17	79	55	4	10	7
AC205122.4_FG006	0	0	0	0	0	0	0	0	0	0	0	2	0	0	0	1	1	2
AC205122.4_FG007	0	0	0	0	0	0	0	0	0	0	0	0	0	0	0	0	0	1
AC205122.4_FG008	0	0	0	0	0	0	0	0	0	0	0	0	0	0	0	0	0	0
AC205122.4_FG009	0	2	3	0	0	0	2	3	3	0	1	0	0	2	0	0	0	0
AC205122.4_FG010	3	10	22	2	3	3	2	0	2	20	53	77	4	11	10	2	2	11
AC205154.3_FG001	0	1	7	11	10	24	1	0	2	0	0	8	1	4	1	0	0	0
AC205154.3_FG005	0	2	0	0	0	5	0	0	0	4	3	0	0	0	2	0	4	0
AC205155.3_FG001	0	0	0	0	0	0	0	0	0	0	0	0	0	0	0	0	0	0
AC205158.3_FG004	0	0	2	2	1	4	0	0	2	0	0	0	0	5	6	0	0	0
AC205165.3_FG002	0	0	0	3	0	0	0	0	0	0	0	0	0	0	0	2	1	0
AC205171.3_FG001	0	0	0	0	0	0	0	0	0	0	0	0	0	0	0	0	0	0
AC205173.3_FG001	0	0	0	0	0	0	0	0	0	0	0	0	0	0	0	0	0	0
AC205175.3_FG001	0	6	0	3	5	8	4	9	8	0	0	4	2	2	2	4	1	1
AC205175.3_FG002	0	3	15	4	0	13	5	3	4	5	6	25	5	31	24	1	0	3
AC205250.3_FG004	0	0	0	0	0	0	0	1	0	1	0	0	0	0	0	0	2	8
AC205250.3_FG006	21	65	71	58	118	155	15	23	45	26	71	108	142	413	573	10	107	67
AC205251.3_FG002	0	0	0	0	0	0	0	3	0	0	3	3	0	1	8	0	0	3
AC205269.3_FG003	0	1	0	0	2	3	0	0	0	0	0	1	0	0	0	0	0	0
AC205274.3_FG001	0	1	0	0	0	0	0	0	1	3	7	9	0	2	0	0	0	0
AC205320.3_FG004	9	37	51	171	343	487	10	30	62	24	57	81	134	527	590	1	29	20
AC205324.3_FG003	11	49	54	29	37	71	3	14	33	17	46	82	17	66	65	18	30	16
AC205326.3_FG002	101	301	383	144	334	379	158	355	576	102	378	397	112	351	512	104	284	332
AC205331.3_FG004	0	0	0	0	0	0	0	0	0	0	0	0	0	0	0	0	0	0
AC205336.3_FG003	0	0	0	0	0	0	0	2	0	4	19	10	58	66	157	0	1	6
AC205345.3_FG002	12	53	68	46	53	77	20	51	68	18	71	84	12	69	121	7	51	57
AC205362.4_FG002	84	361	415	59	117	144	86	210	248	371	943	1194	42	222	209	75	365	344
AC205369.3_FG001	0	0	0	0	10	11	0	0	0	0	0	2	0	7	3	0	2	0
AC205376.4_FG003	206	680	751	602	1064	1293	153	497	580	140	435	425	160	376	619	92	655	676
AC205376.4_FG008	67	218	314	98	204	254	36	115	175	161	302	422	71	156	276	20	259	174
AC205379.3_FG012	5	10	14	1	0	4	2	3	0	7	7	12	2	6	4	0	2	0
AC205395.3_FG003	0	0	0	0	0	0	0	0	0	0	0	0	0	0	0	0	1	1
AC205405.3_FG001	0	0	0	0	0	0	0	0	0	0	0	0	0	0	0	0	0	0
AC205411.3_FG001	0	0	0	0	0	0	0	0	0	0	0	0	0	2	0	0	0	0
AC205413.4_FG001	11	20	29	1	3	7	0	6	18	37	92	93	31	92	137	8	23	15
AC205413.4_FG002	11	62	48	2	3	11	3	18	24	2	22	11	1	8	9	0	15	18
AC205413.4_FG003	39	138	129	0	23	27	30	58	118	6	17	19	0	14	13	9	38	9
AC205417.3_FG003	0	0	0	12	13	15	0	0	0	0	0	0	0	7	12	0	0	0
AC205419.3_FG001	1740	5686	7158	3372	6978	8231	931	3252	4302	2672	7020	8583	2288	6775	9474	949	2802	2702
AC205425.3_FG006	2	2	0	0	1	2	4	4	15	0	1	0	0	0	0	0	0	3
AC205466.3_FG003	0	0	0	0	0	0	0	0	1	1	0	1	0	0	0	0	0	1
AC205470.3_FG008	1	7	4	4	5	8	1	5	12	8	18	23	8	39	29	1	6	6
AC205471.4_FG003	18	83	114	87	143	220	50	166	171	24	51	52	36	125	143	37	135	85
AC205471.4_FG007	200	586	746	407	718	836	141	495	671	201	361	517	448	736	1473	60	458	416
AC205471.4_FG008	1	0	1	0	2	8	2	2	0	3	3	5	0	2	8	0	2	0
AC205476.3_FG007	0	0	1	1	0	0	0	2	0	0	0	0	0	0	0	0	0	0
AC205484.3_FG005	17	43	45	13	54	81	12	18	15	34	80	110	10	50	69	16	58	27
AC205485.3_FG011	4	22	16	50	55	156	0	5	12	7	8	28	5	19	36	9	9	4
AC205490.4_FG004	0	0	0	1	0	0	0	0	0	2	11	4	0	3	3	0	0	0
AC205496.3_FG002	21	88	123	24	53	82	36	103	134	0	0	0	0	1	0	0	0	0
AC205500.3_FG002	1	9	8	2	4	13	0	1	8	23	132	113	27	81	125	7	60	63
AC205502.4_FG004	2	21	22	16	32	28	9	13	23	24	56	81	51	135	132	26	203	148
AC205511.3_FG002	1	3	1	0	3	1	8	28	40	0	0	0	0	0	0	0	0	0
AC205513.3_FG003	1	0	0	0	0	0	0	0	0	0	0	0	0	0	0	0	0	0
AC205521.3_FG003	744	2766	3373	1511	3175	3927	577	1762	2279	1673	4480	5380	1102	3133	4521	237	1304	1080
AC205532.3_FG001	0	12	10	4	0	9	0	0	0	0	1	0	0	8	2	0	1	0
AC205534.3_FG001	0	0	0	0	0	1	0	0	0	0	0	0	0	8	8	0	0	0
AC205534.3_FG002	1	0	1	12	4	22	3	4	11	5	17	30	7	60	59	9	16	17
AC205544.3_FG004	0	1	3	0	1	0	1	0	0	6	32	11	12	11	21	0	2	8
AC205558.3_FG002	1	0	3	0	2	0	0	0	0	37	120	130	25	49	62	61	475	398
AC205560.3_FG003	4	21	19	79	108	167	2	5	8	1	9	7	11	70	49	0	2	0
AC205562.3_FG002	11	125	92	42	106	123	15	28	42	5	29	34	77	354	402	11	153	126
AC205567.3_FG002	0	5	7	0	2	0	0	0	2	0	0	0	1	0	0	0	0	0
AC205574.3_FG006	82	296	324	534	1124	1308	122	224	318	743	2012	2269	503	2159	2512	36	104	132
AC205591.4_FG006	0	0	0	0	0	0	0	0	0	0	0	0	0	0	0	0	0	0
AC205592.3_FG001	6	18	7	4	2	12	3	6	16	5	8	19	5	16	5	6	14	10
AC205595.3_FG007	0	0	0	0	0	0	0	0	0	0	0	0	0	0	0	0	0	0
AC205605.3_FG002	0	3	2	2	4	10	0	6	19	0	4	0	0	5	4	0	2	0
AC205608.4_FG004	1901	5630	8260	4536	9030	10586	464	1799	2254	2987	7694	8671	2429	5673	9197	424	1877	1733
AC205615.4_FG002	0	0	0	0	0	0	0	0	0	0	0	0	0	0	0	0	0	0
AC205619.3_FG003	2	0	1	0	0	0	0	0	2	0	0	0	0	0	0	0	0	0
AC205664.3_FG001	0	0	0	0	0	0	0	0	0	45	138	160	19	59	74	30	55	75
AC205672.3_FG001	0	0	0	0	0	2	0	0	0	0	0	0	0	0	0	0	0	0
AC205673.3_FG006	6	38	65	14	22	22	14	29	34	17	56	62	15	14	36	5	33	36
AC205677.3_FG001	629	2050	2557	884	1517	2199	366	1064	1458	1131	3117	3447	632	1861	2564	351	912	954
AC205695.3_FG008	0	0	0	0	0	0	0	0	0	0	0	0	0	0	0	0	0	0
AC205703.4_FG001	8	32	41	6	11	15	21	44	78	40	72	59	17	26	30	5	40	31
AC205703.4_FG002	834	2425	3069	2090	3484	5120	2535	7592	10600	1008	2784	3297	1089	3643	4839	1361	8387	7070
AC205703.4_FG005	118	367	502	334	632	714	73	290	458	114	283	262	70	254	358	13	79	71
AC205703.4_FG006	1811	6275	7361	3145	6660	8159	812	2819	3408	2179	4524	6027	1330	4268	5843	232	2148	1801
AC205703.4_FG010	486	1960	2479	537	1119	1297	638	2031	2664	585	1913	2157	343	1520	1583	478	816	823
AC205709.3_FG001	0	0	1	0	0	2	0	4	3	0	0	0	0	0	0	0	0	0
AC205712.3_FG003	3	4	4	1	1	6	1	1	1	3	4	17	0	3	6	0	2	1
AC205713.4_FG004	0	0	0	0	0	0	0	0	0	0	0	0	0	0	0	0	0	0
AC205722.3_FG004	0	0	0	0	0	0	0	0	0	0	0	0	0	0	0	1	2	0
AC205725.3_FG010	289	793	971	294	1099	669	238	671	888	457	1304	1350	210	725	887	201	687	578
AC205726.4_FG003	0	1	0	0	0	0	0	0	1	0	0	0	0	0	0	0	0	0
AC205730.3_FG001	3	6	3	20	60	42	23	67	99	2	6	16	4	13	37	35	28	40
AC205730.3_FG002	339	1097	1562	731	1431	1821	181	747	1023	340	1168	1410	330	1463	1505	368	867	691
AC205735.3_FG006	31	150	183	73	151	212	52	101	156	30	49	91	19	41	75	11	18	27
AC205813.4_FG008	0	0	0	0	0	0	0	0	0	0	0	0	0	0	0	0	0	0
AC205814.3_FG001	2	1	7	2	1	4	0	0	0	0	0	0	0	0	0	0	0	0
AC205833.3_FG002	6	12	29	20	4	40	1	8	14	7	7	10	9	23	29	0	4	7
AC205834.3_FG003	47	160	190	232	332	580	27	86	132	33	103	128	71	264	271	37	46	45
AC205853.3_FG014	5	8	7	8	104	54	15	70	57	25	64	97	15	83	70	41	45	41
AC205886.3_FG001	1409	4028	5421	2956	6866	7709	599	2331	3054	107	158	233	129	546	488	15	236	161
AC205888.4_FG004	36	71	152	60	65	206	19	62	89	25	47	77	10	57	64	10	17	32
AC205907.3_FG004	0	0	0	0	0	0	0	0	0	4	4	0	0	2	2	0	0	2
AC205968.3_FG001	11	45	68	17	22	29	5	4	9	12	18	35	7	39	50	1	15	7
AC205972.3_FG002	0	2	1	0	0	5	0	0	0	0	0	0	0	0	0	0	0	0
AC205976.3_FG004	0	0	0	13	4	3	0	0	5	1	0	0	0	4	3	0	0	0
AC205982.3_FG014	175	417	582	168	407	541	198	550	754	216	606	552	101	400	372	52	158	170
AC206030.4_FG001	47	226	288	173	476	467	5	16	9	91	257	355	24	107	106	7	35	28
AC206031.3_FG007	0	0	0	2	6	1	0	3	3	32	53	54	3	8	18	4	9	7
AC206156.3_FG003	0	0	0	0	0	0	0	0	0	0	0	0	0	0	0	0	0	0
AC206156.3_FG009	0	0	0	0	0	0	0	0	0	0	0	0	0	0	0	0	0	0
AC206160.3_FG001	0	0	0	0	0	0	0	0	0	0	0	1	0	0	0	0	0	0
AC206165.3_FG007	2	10	6	1	4	2	1	6	0	0	32	23	2	4	6	4	42	26
AC206165.3_FG009	0	0	3	0	0	0	0	0	2	0	0	0	0	0	0	0	1	2
AC206165.3_FG019	61	213	208	493	998	1419	78	136	189	28	63	48	54	250	259	39	110	86
AC206166.3_FG002	0	0	0	0	0	0	0	0	0	0	1	3	0	0	0	0	2	0
AC206168.2_FG003	3	22	29	4	2	5	1	6	11	5	19	25	4	6	8	2	1	1
AC206169.3_FG002	0	0	0	11	15	24	0	2	0	0	2	0	4	28	31	0	0	0
AC206184.4_FG002	0	0	0	0	0	0	0	0	0	0	0	0	0	0	0	0	0	2
AC206185.3_FG002	111	390	480	94	157	221	43	114	195	0	2	2	0	4	7	2	6	3
AC206186.3_FG001	0	0	0	0	1	2	0	0	0	0	0	0	2	0	0	0	0	0
AC206194.3_FG003	1	5	3	2	3	1	0	0	1	0	2	0	0	1	0	0	3	3
AC206198.3_FG001	147	480	577	312	741	957	66	242	266	160	533	437	190	671	769	35	122	143
AC206199.3_FG001	0	0	0	0	0	0	0	0	0	0	0	0	0	0	0	0	0	0
AC206199.3_FG005	1	11	10	15	31	40	0	0	3	1	5	9	14	64	27	2	3	2
AC206201.3_FG004	33	92	125	63	147	141	30	37	45	75	196	212	52	241	304	21	127	101
AC206201.3_FG009	14	93	113	67	42	170	22	35	52	23	35	54	18	90	76	17	26	36
AC206217.2_FG006	0	0	0	0	0	0	3	5	8	0	0	0	0	4	2	0	0	1
AC206223.3_FG001	112	323	463	111	214	340	60	139	198	289	565	764	109	290	476	45	276	231
AC206223.3_FG004	102	373	515	173	300	466	66	257	276	42	137	110	38	154	202	17	67	75
AC206223.3_FG006	49	197	213	67	196	198	91	191	310	163	501	582	48	209	262	24	198	178
AC206223.3_FG007	4	14	12	5	5	11	0	10	15	4	5	8	0	1	5	1	10	8
AC206223.3_FG008	4	14	30	5	7	13	9	23	15	10	4	7	7	5	12	5	27	19
AC206223.3_FG010	93	242	400	146	324	458	61	180	240	172	436	514	166	334	570	51	268	223
AC206227.4_FG001	0	0	0	0	0	0	0	0	0	0	0	0	0	0	0	0	0	0
AC206259.3_FG002	95	339	550	232	628	561	62	231	299	123	352	496	83	352	410	117	125	193
AC206259.3_FG003	2214	7930	10296	3852	8230	10155	1310	4224	5423	2440	7393	8747	1541	6814	7550	1534	2676	2833
AC206262.3_FG004	0	0	0	0	0	0	0	0	0	0	0	0	0	0	0	0	0	0
AC206265.3_FG006	31	83	76	3	9	16	9	28	38	7	31	12	0	2	4	0	20	17
AC206266.3_FG001	439	1419	1917	679	1331	1424	165	536	561	357	1258	1311	207	1096	1254	124	222	303
AC206273.3_FG004	54	176	174	76	89	101	34	100	106	21	47	60	18	34	38	8	39	50
AC206274.3_FG008	0	0	0	0	0	0	0	2	2	0	0	0	0	0	0	0	2	1
AC206285.3_FG003	0	6	2	0	0	2	0	0	0	0	2	0	0	0	4	0	0	0
AC206285.3_FG005	0	1	0	0	0	0	0	1	0	0	0	0	0	0	0	0	0	0
AC206312.3_FG008	0	0	0	0	2	4	1	2	2	0	0	0	0	0	0	0	0	0
AC206319.2_FG004	8	53	22	10	19	18	3	3	5	10	44	55	11	17	33	0	5	3
AC206325.3_FG003	7	5	13	0	0	3	2	1	4	0	3	0	0	4	3	0	1	1
AC206332.3_FG005	0	2	0	2	3	3	3	3	4	0	1	4	2	0	0	0	2	5
AC206349.2_FG002	0	0	0	0	0	0	0	0	0	0	0	0	0	0	0	0	0	0
AC206350.3_FG005	2	0	3	3	9	25	0	6	9	0	0	0	0	2	7	0	0	2
AC206392.3_FG004	0	2	0	0	1	1	0	0	0	0	6	2	1	6	8	1	1	2
AC206425.3_FG002	0	0	0	0	2	0	0	2	0	0	2	0	0	0	1	0	4	5
AC206425.3_FG004	8	21	14	17	73	38	3	9	16	17	29	28	5	18	26	0	22	21
AC206503.3_FG001	0	0	0	0	0	0	0	0	0	0	0	0	0	0	0	0	0	2
AC206514.2_FG002	0	0	0	0	0	0	0	0	0	0	0	0	0	0	0	0	0	0
AC206519.2_FG002	0	0	0	0	0	0	0	0	0	0	0	0	0	0	0	0	0	0
AC206547.2_FG002	7	26	18	25	19	31	1	7	16	2	8	16	15	27	18	0	9	11
AC206582.2_FG002	114	417	515	247	446	588	66	165	258	98	301	360	108	375	454	100	205	195
AC206610.4_FG004	0	0	0	0	0	0	0	0	0	0	0	0	0	0	0	0	4	0
AC206610.4_FG005	0	0	0	0	0	2	0	0	0	0	2	0	0	0	0	0	0	1
AC206611.3_FG002	0	2	0	0	1	1	0	0	0	0	0	0	0	0	0	0	0	0
AC206611.3_FG003	6	39	28	12	11	38	2	18	13	5	12	5	6	6	1	0	1	2
AC206634.3_FG004	64	167	219	110	169	284	38	96	108	8	8	16	30	36	30	4	10	10
AC206638.3_FG007	0	1	1	1	11	4	1	1	1	0	0	0	1	4	4	9	15	9
AC206638.3_FG015	0	2	2	2	0	0	0	6	0	0	0	0	0	0	0	0	1	0
AC206642.4_FG001	747	2007	2724	1218	2000	3028	455	1616	2184	1347	3269	3453	1054	2095	3689	288	1915	1504
AC206647.3_FG003	0	0	0	0	0	0	0	0	0	0	0	0	0	0	0	0	0	0
AC206655.3_FG004	0	0	0	0	0	0	1	0	0	0	0	0	0	0	0	0	0	2
AC206695.3_FG001	0	0	0	0	0	0	0	0	0	0	0	0	0	0	0	0	0	0
AC206698.2_FG002	0	0	0	0	0	0	0	0	0	0	0	0	0	0	0	0	0	1
AC206700.3_FG003	4	6	18	2	2	4	3	10	13	3	4	1	5	7	22	0	4	0
AC206749.3_FG003	0	0	0	0	0	0	0	0	0	0	0	0	0	0	0	0	0	0
AC206763.3_FG002	0	0	0	0	0	0	0	0	0	0	0	0	0	0	0	0	0	0
AC206764.4_FG001	25	121	126	291	650	642	7	41	58	58	171	213	298	841	1176	22	66	73
AC206764.4_FG003	35	102	97	102	208	244	9	35	63	41	40	93	11	43	70	2	12	21
AC206768.3_FG005	26	102	127	40	85	99	13	39	25	19	56	78	10	56	45	8	69	29
AC206768.3_FG006	0	0	0	0	0	0	0	0	0	0	0	0	0	0	0	0	0	0
AC206780.3_FG004	41	70	160	56	78	123	17	45	77	72	219	273	46	165	177	61	110	122
AC206788.3_FG008	10	29	48	12	10	15	4	14	14	9	22	11	2	6	6	2	11	7
AC206788.3_FG015	395	1550	1789	324	884	875	330	894	1224	623	1707	2061	778	2928	3402	253	1575	1454
AC206831.3_FG015	0	0	0	0	0	0	0	0	0	0	0	0	0	0	0	1	3	0
AC206832.3_FG004	0	0	2	0	0	0	44	79	145	0	0	0	0	0	0	0	0	0
AC206840.3_FG002	91	234	292	107	247	306	48	138	192	198	483	519	120	366	584	32	302	221
AC206898.3_FG006	18	18	24	23	15	37	3	33	36	24	60	35	30	53	87	8	18	13
AC206901.3_FG005	44	156	134	56	100	125	40	129	107	32	88	98	22	52	83	12	45	50
AC206941.2_FG002	0	0	0	0	0	0	0	1	0	0	1	0	0	0	0	2	0	0
AC206946.2_FG009	0	0	0	0	0	0	0	0	0	0	0	0	0	0	0	0	0	0
AC206951.3_FG014	0	1	7	1	2	1	0	1	4	0	0	0	0	0	0	0	0	0
AC206951.3_FG016	2	10	16	6	12	18	32	74	87	0	3	2	0	3	2	3	22	5
AC206951.3_FG017	495	1847	1872	3401	7371	8299	2483	6116	8209	514	1276	2113	4499	12095	18345	612	4979	4610
AC206952.3_FG001	0	0	0	0	0	0	0	0	0	0	0	0	0	0	0	0	0	1
AC206968.3_FG001	0	0	0	0	0	0	0	0	0	0	0	0	0	0	0	0	0	0
AC206968.3_FG003	1046	3643	4550	1941	3879	4003	709	2431	3074	1910	5597	5830	1383	3166	5854	490	3006	2716
AC206969.3_FG001	1	2	7	2	2	32	2	19	48	0	13	9	2	1	14	4	3	3
AC206980.3_FG007	0	1	1	1	3	7	2	20	14	10	15	9	1	13	19	2	3	5
AC206989.4_FG002	217	660	802	251	502	540	133	438	631	242	627	846	126	477	577	122	371	350
AC206999.1_FG002	578	1751	2308	430	686	1286	3095	8878	12134	1	2	1	1	22	4	0	1	14
AC206999.1_FG007	0	0	0	0	0	0	0	0	0	0	0	1	0	0	1	0	0	0
AC207011.3_FG001	70	210	299	87	15	207	36	133	161	0	0	0	0	0	0	0	0	0
AC207019.3_FG003	0	0	0	0	0	0	0	0	0	0	0	0	0	0	0	0	0	2
AC207024.3_FG002	4	29	16	4	7	0	1	11	9	25	40	53	8	15	30	6	44	21
AC207043.3_FG002	26	49	75	119	327	334	139	348	411	7	34	52	208	533	726	55	359	303
AC207043.3_FG004	4	7	18	12	17	16	0	20	14	0	5	1	0	19	14	1	1	6
AC207080.3_FG005	30	80	102	72	52	165	16	35	91	33	78	115	27	115	196	6	30	51
AC207104.3_FG001	0	0	0	0	0	0	0	0	0	0	0	0	0	0	0	0	0	0
AC207107.4_FG001	0	0	0	0	0	0	0	0	0	0	0	1	0	0	1	0	0	0
AC207107.4_FG002	5	5	2	4	24	8	1	0	2	0	0	0	0	1	0	0	0	0
AC207119.3_FG001	0	0	0	1	3	0	0	0	0	2	0	1	1	5	1	2	1	1
AC207188.3_FG002	2	1	2	0	2	5	0	6	1	2	4	4	0	0	0	0	2	2
AC207189.4_FG002	0	8	13	0	1	8	11	21	35	0	2	1	3	16	20	9	55	60
AC207205.3_FG004	6	17	20	3	13	12	6	37	48	2	0	0	0	6	6	0	0	3
AC207206.3_FG001	0	0	0	0	0	0	0	0	0	0	0	4	0	0	0	0	1	0
AC207206.3_FG003	0	0	0	0	0	0	2	0	0	0	0	0	0	0	0	0	0	0
AC207225.3_FG001	0	0	0	0	0	0	0	0	0	0	0	0	0	0	0	0	0	0
AC207225.3_FG003	53	102	186	78	199	350	25	77	92	75	233	255	83	314	347	25	105	90
AC207231.3_FG001	0	0	0	0	0	0	0	0	0	0	0	0	0	0	0	0	0	0
AC207254.3_FG005	0	2	5	1	0	0	0	0	3	4	6	7	0	18	9	0	1	0
AC207260.3_FG003	1	3	9	1	0	8	1	4	5	63	148	168	26	107	117	38	105	121
AC207260.3_FG004	0	0	0	0	0	0	0	0	0	0	0	0	0	0	0	0	0	0
AC207265.3_FG002	2424	8237	10603	3025	6148	7433	1086	3994	4883	2412	5962	7220	1468	5228	6697	1070	3630	3313
AC207309.3_FG007	59	264	267	68	138	161	135	276	412	99	136	236	23	85	136	52	373	335
AC207309.3_FG010	0	0	0	0	1	0	0	0	0	0	0	0	0	0	0	0	0	0
AC207321.3_FG003	5	35	49	21	37	40	5	18	25	16	38	42	3	66	60	14	17	12
AC207328.3_FG003	2	2	16	1	2	4	0	7	8	2	2	4	0	0	0	0	2	3
AC207342.3_FG001	0	0	0	0	0	0	0	0	0	0	0	0	0	0	0	0	0	0
AC207342.3_FG007	61	260	370	142	258	299	78	211	323	149	362	398	81	309	399	30	178	149
AC207342.3_FG008	2928	9701	11495	5768	12267	13737	2031	6592	8105	1944	5406	5866	3687	12132	14711	862	5824	5144
AC207347.3_FG005	458	1293	1847	406	755	912	201	599	845	487	1142	1264	173	594	837	154	732	672
AC207383.3_FG003	3	1	8	0	3	2	0	3	6	0	0	0	0	0	0	0	0	1
AC207389.3_FG004	0	0	0	0	0	0	2	13	8	0	0	0	0	0	0	2	22	12
AC207397.3_FG001	4	15	9	9	0	9	0	12	1	0	3	4	1	0	11	2	3	0
AC207427.3_FG005	40	80	133	94	119	235	18	42	61	69	122	166	54	144	157	16	45	58
AC207454.3_FG004	0	4	4	2	5	6	0	5	4	0	0	0	0	0	0	0	0	0
AC207472.3_FG001	5	6	48	23	13	63	21583	86355	92412	4	0	0	0	52	67	9254	118657	151212
AC207533.2_FG002	3	45	24	23	45	69	4	17	26	15	58	72	12	71	65	14	21	15
AC207544.3_FG011	0	0	0	0	0	0	0	0	0	0	0	0	0	0	0	0	0	1
AC207546.3_FG004	23	69	98	37	82	143	13	54	92	3	34	44	4	35	40	8	20	3
AC207549.3_FG010	0	0	0	0	0	0	0	0	0	0	0	0	0	0	0	0	0	0
AC207575.3_FG004	1	4	6	2	2	6	0	1	1	0	0	0	0	0	0	0	0	0
AC207619.3_FG001	0	0	0	0	31	0	0	0	0	1	3	5	1	0	2	2	5	4
AC207620.2_FG007	0	0	0	0	0	2	0	0	1	0	0	2	8	12	16	0	0	0
AC207628.4_FG002	402	1148	1525	875	1558	1895	686	2395	2700	1032	3528	3671	712	2370	3178	198	1347	1265
AC207628.4_FG003	43	86	101	102	238	208	8	44	64	46	125	178	48	189	222	16	40	25
AC207628.4_FG005	0	1	3	6	12	27	2	11	5	12	49	42	17	36	69	3	15	15
AC207628.4_FG009	907	3857	4527	1183	1574	2768	700	2381	2937	2568	6580	8034	2307	6202	9516	1557	6429	5552
AC207628.4_FG010	99	250	340	41	104	88	41	137	151	112	254	303	38	123	140	15	104	88
AC207628.4_FG011	1076	3172	4191	2233	3987	4994	1890	5689	7118	2869	9065	9618	2050	6049	8586	619	3338	3271
AC207649.3_FG002	5	14	25	4	9	15	7	10	23	0	1	1	0	1	2	0	0	0
AC207652.3_FG001	65	182	214	296	520	685	49	187	295	143	494	547	193	571	680	75	228	164
AC207655.2_FG003	27	94	129	37	68	82	15	64	78	0	0	1	0	2	0	0	0	0
AC207656.3_FG002	558	1967	2398	2206	4587	5381	79	265	350	854	2011	2434	1645	4107	6072	62	302	281
AC207722.2_FG009	125199	421433	524939	158278	329773	408330	61237	190369	241808	129432	306657	392393	141735	391052	560031	45892	365548	301179
AC207728.2_FG003	91	371	395	220	317	563	149	408	573	101	210	289	47	200	275	109	259	227
AC207732.3_FG010	20	63	75	27	72	80	14	39	52	28	72	79	23	49	83	7	24	18
AC207733.3_FG001	0	1	0	0	0	0	0	2	2	0	0	0	0	0	0	0	0	0
AC207733.3_FG007	0	0	0	0	0	0	0	0	0	0	0	0	0	0	0	0	0	0
AC207740.3_FG005	0	0	0	0	0	0	0	0	0	0	0	0	0	0	0	0	0	0
AC207755.3_FG005	322	911	970	917	1934	1979	163	453	471	427	898	1131	485	1645	2007	31	367	314
AC207756.3_FG001	65	195	225	87	135	197	62	213	293	125	338	468	49	189	251	80	286	245
AC207767.2_FG001	14	63	74	107	102	272	9	40	74	41	109	111	35	152	157	28	25	43
AC207784.3_FG007	0	0	0	0	0	0	0	0	0	0	0	0	0	0	0	0	0	0
AC207790.2_FG001	0	0	0	0	0	0	0	0	0	0	0	0	0	0	0	0	0	0
AC207793.3_FG002	1	0	2	2	2	2	0	3	2	57	210	207	79	292	345	18	31	20
AC207798.2_FG003	19	55	59	37	67	55	25	70	77	20	94	92	15	68	75	3	49	39
AC207803.3_FG003	67	327	400	156	344	360	26	74	106	119	266	310	83	300	418	73	110	98
AC207814.3_FG002	0	0	0	0	0	0	0	0	0	0	0	0	0	0	0	0	0	0
AC207814.3_FG003	1	3	2	1	0	4	1	6	5	0	4	6	0	0	4	1	2	1
AC207888.3_FG009	0	0	2	0	0	4	0	4	1	3	7	14	0	2	7	3	2	2
AC207890.3_FG002	1735	7768	8799	8777	16087	21708	760	2681	3534	3424	9022	10917	8981	27972	36786	1001	2564	2426
AC207896.4_FG003	0	0	0	0	0	0	0	0	0	0	0	0	0	0	0	0	0	0
AC208023.3_FG001	741	2203	2903	1330	2315	2743	574	1594	2495	1509	2973	3656	1041	2044	3668	265	2137	1814
AC208026.3_FG005	4	20	19	20	26	27	12	54	78	0	0	3	0	3	17	3	0	0
AC208031.3_FG002	22	77	103	12	23	47	2	14	9	53	130	154	12	31	58	1	11	5
AC208031.3_FG005	4	10	12	5	5	17	2	6	1	7	19	14	3	12	21	0	4	1
AC208035.3_FG002	0	0	0	0	0	0	0	0	0	0	0	0	0	0	0	0	0	0
AC208042.3_FG005	0	0	0	0	0	0	0	0	1	0	1	1	0	1	1	0	3	0
AC208079.3_FG001	0	0	0	0	0	0	0	0	0	0	0	0	0	0	0	0	0	0
AC208082.3_FG008	0	0	0	0	0	0	0	0	0	0	2	0	0	0	0	0	0	0
AC208109.2_FG004	0	0	0	0	0	0	0	0	0	0	0	0	0	0	0	0	0	0
AC208110.2_FG001	0	0	0	0	0	0	0	0	0	0	2	0	0	3	2	0	0	0
AC208110.2_FG005	0	1	0	0	0	0	0	0	2	3	0	0	1	4	0	0	2	0
AC208110.2_FG006	1322	4204	5278	244	416	539	215	753	905	3669	10100	11275	527	1785	2336	970	2079	2133
AC208110.2_FG007	552	1520	1903	460	866	1184	203	452	776	1394	3366	4018	408	744	1442	71	908	756
AC208110.2_FG011	0	0	0	0	0	0	0	0	0	0	2	4	0	4	7	0	2	2
AC208113.3_FG001	0	0	0	0	0	0	0	0	0	0	0	0	0	0	0	0	0	0
AC208113.3_FG005	53	209	248	55	140	149	71	196	237	61	204	215	51	135	179	34	257	190
AC208113.3_FG009	52	172	256	52	153	134	222	642	959	62	176	189	24	94	156	78	549	405
AC208122.2_FG003	0	0	0	0	0	0	0	0	0	0	0	0	0	0	0	0	0	0
AC208126.3_FG001	0	0	8	0	0	0	0	1	0	0	0	0	0	0	0	0	0	0
AC208201.3_FG001	287	946	1168	441	807	959	222	610	818	344	757	1028	295	600	1074	76	545	485
AC208201.3_FG002	80	436	433	1167	2351	2589	234	588	867	133	292	391	928	2773	3773	45	250	218
AC208201.3_FG003	709	2189	2746	621	1316	1521	244	766	927	1520	2861	4106	581	2432	2605	152	1044	814
AC208204.3_FG006	767	1995	2783	521	1233	1364	269212	815423	1050154	1053	3191	3497	404	2473	8355	83639	765783	642885
AC208212.3_FG001	5	16	28	21	35	64	4	8	16	19	68	59	56	104	135	7	14	18
AC208217.3_FG001	1	11	9	6	5	8	1	4	7	5	7	6	4	5	9	1	11	10
AC208221.3_FG002	288	559	1033	92	166	183	193	591	709	0	8	23	6	2	4	1	3	2
AC208308.3_FG003	0	0	4	4	7	8	0	0	0	0	0	0	1	12	5	0	0	0
AC208308.3_FG004	0	0	1	17	22	37	1	6	6	2	10	0	21	116	86	1	4	11
AC208327.4_FG002	6	8	8	1	15	10	8	13	25	5	16	18	1	12	9	5	9	7
AC208327.4_FG003	675	2327	3049	2006	3314	4455	495	1472	1897	739	2190	2261	761	2069	3165	172	833	681
AC208327.4_FG006	517	1545	1946	301	570	718	658	1592	2276	510	1475	1564	241	577	862	339	2159	1922
AC208337.2_FG003	31	56	50	35	181	64	3	32	18	23	83	105	21	80	78	9	19	23
AC208338.3_FG010	1	9	15	2	1	20	2	5	2	0	0	0	0	0	0	0	0	0
AC208341.4_FG005	310	1128	1253	278	612	729	248	756	1091	329	887	1020	200	580	787	112	880	680
AC208341.4_FG006	54	209	263	99	185	173	36	111	130	56	213	254	37	111	202	9	123	142
AC208341.4_FG007	0	2	0	3	7	13	0	10	7	5	8	0	0	8	7	3	0	0
AC208341.4_FG008	33	130	159	76	34	142	19	50	73	57	127	169	38	176	169	27	97	79
AC208346.3_FG004	122	343	493	146	327	405	132	317	450	194	545	650	95	366	475	54	393	357
AC208348.3_FG012	33	89	128	104	212	230	28	90	101	70	167	156	38	181	185	8	39	46
AC208358.3_FG005	102	470	557	207	314	379	76	244	378	162	579	607	120	324	426	28	141	103
AC208406.3_FG004	13	73	55	97	190	200	7	41	43	46	147	161	56	161	230	8	41	30
AC208411.3_FG013	2	4	9	8	7	12	0	5	2	4	5	27	1	8	11	1	8	7
AC208418.3_FG009	24	73	123	60	70	127	33	66	95	44	69	109	21	71	112	9	44	30
AC208422.3_FG001	0	0	0	0	0	0	0	0	0	0	0	0	0	0	0	0	0	0
AC208422.3_FG002	0	0	0	0	0	0	0	0	0	0	0	0	0	0	0	0	0	0
AC208423.3_FG002	0	2	1	3	0	4	0	0	2	0	0	0	2	2	1	1	0	0
AC208434.3_FG001	7	15	19	7	4	10	2	9	17	2	5	8	2	6	4	3	5	9
AC208434.3_FG007	0	0	0	0	0	0	1	5	6	0	2	0	0	2	0	0	0	0
AC208436.3_FG007	12	35	27	36	76	56	25	28	85	37	145	127	25	96	84	10	25	30
AC208440.3_FG003	375	1439	1782	1024	1853	2245	240	794	1076	540	1638	1634	432	1565	2002	254	799	726
AC208445.3_FG001	0	0	0	0	2	0	0	0	0	0	0	1	0	0	1	0	0	0
AC208445.3_FG006	0	0	0	0	2	0	0	0	0	0	0	2	0	0	0	0	0	0
AC208453.3_FG003	0	0	0	0	0	0	0	0	0	0	0	0	0	2	0	0	0	0
AC208454.3_FG002	0	0	0	5	1	17	0	3	2	1	0	0	3	0	2	0	4	1
AC208458.3_FG011	0	0	4	0	0	0	0	1	2	0	0	0	0	0	0	0	0	0
AC208516.2_FG008	0	0	0	0	0	0	0	3	0	0	0	0	0	0	3	2	1	5
AC208521.3_FG002	0	2	0	3	9	1	0	0	1	0	0	0	1	1	8	0	0	0
AC208530.3_FG003	3	2	8	0	2	2	0	2	1	4	1	3	0	3	0	0	2	0
AC208539.3_FG002	0	0	0	0	0	0	0	0	0	0	0	0	0	0	0	0	0	0
AC208539.3_FG003	0	0	0	0	0	0	9	44	43	0	0	0	0	0	0	2	31	28
AC208559.3_FG003	19	121	141	51	98	151	22	88	136	0	2	0	0	1	0	0	2	0
AC208564.3_FG004	0	0	0	0	0	0	0	0	0	0	1	3	0	3	0	0	2	0
AC208571.4_FG001	668	2121	3182	1267	1905	3130	318	1021	1394	891	2202	2680	639	2331	2922	598	1714	1477
AC208576.3_FG001	0	3	8	6	69	37	0	0	5	8	9	22	2	43	64	10	2	6
AC208577.3_FG005	7	40	32	4	5	15	85	155	265	8	13	25	5	7	6	12	33	36
AC208579.3_FG001	0	0	0	0	0	0	0	5	1	0	0	0	0	0	0	0	4	0
AC208606.3_FG007	0	5	7	1	3	3	0	1	8	0	0	0	0	0	0	0	0	0
AC208610.3_FG010	0	2	2	0	0	3	15	41	76	0	0	6	0	2	6	10	32	31
AC208625.3_FG004	0	12	7	0	2	2	1	2	9	0	0	2	0	0	0	0	0	0
AC208630.3_FG001	0	0	0	0	0	0	0	0	0	0	0	0	0	0	0	0	0	0
AC208641.3_FG009	0	0	0	0	0	0	0	0	0	0	0	0	0	0	0	0	0	0
AC208644.2_FG005	0	0	0	0	4	0	0	0	0	0	0	7	3	4	3	0	3	0
AC208649.4_FG003	9	22	24	8	10	24	4	4	12	7	17	23	4	11	31	2	6	5
AC208663.3_FG002	0	0	0	0	0	0	0	0	0	0	0	0	0	0	0	0	0	0
AC208678.3_FG002	0	0	0	0	0	0	0	0	0	0	0	0	0	0	0	0	2	0
AC208680.3_FG001	0	0	0	0	0	0	0	0	0	0	0	0	0	0	0	0	0	0
AC208702.3_FG007	0	0	0	2	1	0	0	0	2	2	3	1	2	9	14	0	2	2
AC208711.3_FG005	8	11	13	42	80	78	1	8	18	6	34	42	16	51	40	3	0	18
AC208724.3_FG001	62	141	198	191	179	401	31	116	164	152	244	351	151	433	513	87	227	211
AC208826.3_FG003	0	0	0	0	0	0	0	0	0	0	0	0	0	0	0	0	0	0
AC208826.3_FG004	9	35	43	27	31	65	2	13	20	0	4	6	2	10	6	1	3	4
AC208848.3_FG005	0	2	4	10	3	12	0	1	2	1	2	2	3	2	0	0	0	1
AC208855.3_FG002	8	18	24	25	44	64	6	18	18	13	72	47	30	85	111	760	2404	2192
AC208860.3_FG002	23	94	96	51	92	106	17	33	42	24	106	117	42	207	238	21	113	84
AC208892.3_FG005	0	0	0	0	0	3	1	1	13	0	1	0	0	0	0	0	10	2
AC208895.3_FG001	0	0	0	0	0	0	0	0	0	0	0	0	0	0	0	0	0	0
AC208895.3_FG004	0	0	0	0	0	0	0	0	0	0	0	0	0	0	0	0	0	0
AC208897.3_FG003	80	156	275	7	28	34	54	192	270	55	163	181	18	85	75	41	169	174
AC208897.3_FG004	234	1418	1421	145	265	297	257	602	845	716	1959	2010	466	1516	1753	653	2458	2265
AC208905.3_FG004	1	0	0	4	12	6	2	2	6	0	1	1	2	4	7	0	5	1
AC208915.3_FG010	92435	319674	372376	55549	127251	146176	39159	137802	158814	155440	444469	507242	76589	223503	309149	18452	197774	177632
AC208916.3_FG003	0	0	1	0	1	0	0	0	0	0	4	0	2	0	4	2	0	2
AC208920.3_FG001	1	2	1	1	7	7	0	4	2	0	6	1	2	11	19	1	11	3
AC208930.3_FG007	2	0	0	1	0	0	2	1	0	0	0	1	0	1	0	1	1	0
AC208974.3_FG001	0	0	0	0	0	1	0	0	0	0	1	3	0	2	0	0	3	1
AC209015.3_FG004	0	0	2	0	0	0	0	0	0	0	0	0	0	0	1	0	0	1
AC209016.3_FG010	0	0	0	0	0	0	0	0	0	0	0	0	0	0	0	0	0	0
AC209029.2_FG002	0	0	2	0	0	3	2	2	1	0	2	1	0	2	2	0	3	0
AC209050.3_FG001	0	0	0	0	2	0	0	0	1	1	0	0	0	0	2	0	6	0
AC209050.3_FG003	5	545	291	85	219	215	11	71	78	4	45	34	245	660	898	6	59	67
AC209051.3_FG003	0	0	0	0	0	0	0	0	0	0	0	0	0	0	0	0	0	0
AC209062.3_FG002	0	0	4	1	0	0	0	2	2	0	0	2	0	0	1	0	0	2
AC209073.3_FG001	0	1	0	0	0	0	1	1	0	0	0	0	0	1	0	0	0	0
AC209073.3_FG002	0	0	0	0	0	0	0	0	0	0	0	1	1	0	0	0	0	3
AC209074.3_FG007	29	76	115	24	30	55	11	42	59	0	1	1	0	0	3	0	4	1
AC209080.3_FG004	35	111	113	43	89	73	33	45	68	66	136	174	28	92	95	23	93	81
AC209093.3_FG006	15	28	47	5	13	26	17	25	32	0	1	5	0	1	2	0	1	0
AC209168.3_FG007	0	0	0	0	0	0	0	0	0	0	0	0	0	0	0	0	0	0
AC209169.3_FG007	0	0	0	0	3	1	0	1	0	2	3	6	1	5	3	0	2	4
AC209177.3_FG001	0	0	0	0	0	0	0	0	0	3	0	4	0	0	0	0	0	0
AC209206.3_FG004	4	0	7	0	2	3	7	11	25	11	31	64	8	18	22	22	107	90
AC209206.3_FG011	328	1232	1403	776	1691	1794	158	387	509	1278	3974	4172	682	2707	3208	109	394	357
AC209206.3_FG014	0	0	2	2	0	0	0	2	0	0	2	2	0	0	0	0	0	0
AC209208.3_FG001	887	2918	3560	979	1973	2304	828	2624	3677	989	2792	3121	637	2541	2903	1117	3065	2644
AC209208.3_FG002	6119	19359	24929	7946	14945	18601	28537	74520	104548	14289	37990	41275	5626	16503	22904	30644	186850	156927
AC209208.3_FG003	9	45	54	59	130	146	36	126	155	14	34	37	14	37	49	17	48	48
AC209208.3_FG004	1	9	22	14	6	27	0	1	9	0	0	0	0	1	0	1	0	0
AC209208.3_FG005	260	775	1082	232	512	655	115	298	438	440	1177	1384	175	524	909	64	336	277
AC209212.3_FG005	2	15	41	24	47	86	4	11	8	12	30	71	12	35	13	33	13	25
AC209213.4_FG002	118	375	434	106	237	338	152	458	536	2	8	10	4	9	4	1	3	3
AC209215.4_FG004	2	2	16	30	16	58	12	7	0	0	0	6	0	5	0	2	0	0
AC209215.4_FG006	23	56	102	72	98	106	18	48	73	11	37	37	12	23	40	3	12	15
AC209242.3_FG003	222	806	980	519	977	1123	156	472	618	396	1096	1171	310	949	1455	67	552	486
AC209257.4_FG003	7	72	70	18	64	59	20	57	75	42	90	181	19	112	122	3	88	48
AC209257.4_FG004	0	0	0	0	0	0	0	1	0	0	2	0	0	4	5	0	3	0
AC209257.4_FG006	6	9	5	2	4	0	1	8	8	2	32	23	20	49	62	1	9	19
AC209257.4_FG008	113	588	594	330	837	890	72	251	330	142	374	523	134	611	628	52	286	229
AC209332.3_FG011	51	119	148	40	74	108	12	70	66	42	101	159	33	127	123	38	93	110
AC209356.4_FG001	0	0	0	0	0	0	0	0	0	0	0	0	0	0	0	0	2	0
AC209364.3_FG004	64	188	223	101	202	313	59	148	189	36	62	93	36	93	67	42	64	54
AC209364.3_FG007	0	0	0	0	0	0	12	35	53	0	0	0	0	1	0	0	2	4
AC209364.3_FG009	35	69	69	8	32	22	6	32	65	75	119	176	8	54	59	7	54	43
AC209374.4_FG002	500	1997	2160	840	2045	1989	387	1231	1413	572	1220	1741	470	1593	2150	201	1490	1280
AC209377.3_FG003	40	161	156	21	41	55	11	75	93	72	195	234	7	29	53	12	61	67
AC209381.3_FG002	0	0	0	0	2	0	0	0	1	3	0	0	3	18	32	0	0	0
AC209381.3_FG007	0	0	0	1	5	1	0	0	0	0	0	0	0	5	4	0	0	0
AC209438.4_FG002	0	0	0	0	0	0	0	0	0	0	1	1	0	0	0	0	0	0
AC209460.3_FG002	176	688	874	434	673	1060	101	323	410	208	458	503	191	619	899	136	362	365
AC209463.4_FG013	20	61	99	43	67	85	0	17	35	3	3	10	2	13	6	2	2	4
AC209624.2_FG001	0	5	0	2	4	0	2	0	0	0	1	1	0	0	1	0	0	0
AC209624.2_FG003	0	0	0	0	0	0	0	0	0	0	0	0	0	0	0	0	0	0
AC209626.2_FG013	159	466	704	288	573	620	205	815	1184	147	484	556	190	462	816	104	746	670
AC209629.2_FG003	0	0	0	0	0	0	0	0	0	0	0	0	0	0	0	0	0	0
AC209629.2_FG007	0	0	1	0	0	0	0	0	2	1	0	2	0	3	0	0	0	0
AC209636.2_FG003	178	504	689	83	182	189	149	394	491	384	603	959	96	326	405	76	983	885
AC209647.2_FG001	0	0	0	0	0	0	0	0	0	0	0	0	0	0	0	0	0	1
AC209647.2_FG002	0	0	0	0	0	0	0	0	0	0	0	0	0	0	0	0	0	0
AC209651.2_FG001	20	41	58	17	20	93	71	170	275	1	6	3	6	1	0	1	1	2
AC209664.3_FG002	180	589	668	280	598	719	204	586	751	367	997	1217	209	1008	1031	69	408	398
AC209675.3_FG001	5	10	23	10	13	23	5	7	6	0	0	0	0	0	0	0	0	0
AC209697.3_FG005	0	0	0	0	0	0	0	0	0	0	0	2	0	0	0	0	0	0
AC209698.3_FG004	0	0	0	0	2	0	0	3	4	0	0	3	0	1	2	2	0	2
AC209704.3_FG003	12	25	31	12	3	28	7	7	13	1	5	2	1	3	3	5	7	9
AC209705.3_FG004	483	1474	1789	808	1959	2217	139	429	666	602	1440	1645	481	1802	2070	259	573	555
AC209710.4_FG002	0	0	0	1	0	5	0	0	0	0	0	0	0	4	2	0	0	0
AC209718.1_FG009	5	3	6	65	176	248	2	7	14	20	20	20	11	81	62	2	4	0
AC209723.3_FG003	0	0	0	8	7	24	0	0	0	0	0	2	0	10	6	0	0	0
AC209723.3_FG004	0	0	0	0	0	0	0	0	0	0	0	0	0	0	0	0	0	0
AC209729.3_FG003	20	67	93	53	46	176	33	61	156	62	108	161	10	124	160	46	97	86
AC209732.3_FG001	12	25	39	25	24	73	4	14	28	7	13	21	3	8	9	0	4	4
AC209734.3_FG005	0	0	0	0	0	0	0	0	0	0	0	0	0	0	0	0	0	0
AC209737.3_FG006	4	18	15	4	6	6	3	6	4	5	6	18	2	13	15	0	7	8
AC209738.3_FG005	1	0	1	2	3	0	1	1	3	0	1	1	0	2	2	0	5	0
AC209739.3_FG003	0	4	3	0	0	2	0	5	0	7	22	29	0	17	19	0	10	5
AC209744.3_FG001	0	0	0	0	0	0	0	0	0	0	0	0	0	0	0	0	0	0
AC209755.3_FG001	0	0	0	0	0	1	0	1	0	0	0	0	0	0	0	0	0	0
AC209768.3_FG005	0	0	1	0	8	3	14	19	14	0	0	0	2	4	2	0	3	2
AC209768.3_FG016	0	5	1	0	3	2	0	1	5	0	0	0	0	1	1	0	0	0
AC209778.3_FG002	1	3	4	4	1	5	2	5	1	3	7	2	0	9	10	0	2	0
AC209780.2_FG003	1	1	2	157	452	469	5	16	21	0	0	2	61	460	406	0	3	6
AC209784.3_FG007	218	268	699	47	139	302	76188	230582	304692	27	291	224	19	581	3179	77878	367993	318856
AC209784.3_FG011	46	198	311	118	300	321	45	146	194	63	125	137	59	155	162	18	99	46
AC209810.3_FG002	0	0	0	0	2	0	0	1	0	0	0	0	0	2	0	0	0	3
AC209811.3_FG001	0	0	0	0	0	0	0	0	0	0	0	0	0	0	0	0	0	0
[truncated: 37,657 more rows]
